# Supplementary material for: Randomised controlled trial of weekly chloroquine to re-establish normal erythron iron flux and haemoglobin recovery in postmalarial anaemia
Source: PubMed Central journal article supplement — BMJ Open. 2013 Jul 4;3(7):e002666. doi: 10.1136/bmjopen-2013-002666 (PMC3703580; doi:10.1136/bmjopen-2013-002666), 2013-07-04
Supplement: bmjopen-2013-002666.draft_revisions.pdf [file bmjopen-2013-002666.draft_revisions.pdf]

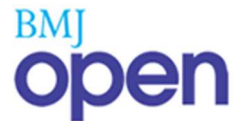

**Randomised controlled trial of weekly chloroquine to re-establish normal erythron iron flux and haemoglobin recovery in post-malarial anaemia**

|                                 |                                                                                                                                                                                                                                                                                                                                                                                                                                                                                                                                       |
|---------------------------------|---------------------------------------------------------------------------------------------------------------------------------------------------------------------------------------------------------------------------------------------------------------------------------------------------------------------------------------------------------------------------------------------------------------------------------------------------------------------------------------------------------------------------------------|
| Journal:                        | <i>BMJ Open</i>                                                                                                                                                                                                                                                                                                                                                                                                                                                                                                                       |
| Manuscript ID:                  | bmjopen-2013-002666                                                                                                                                                                                                                                                                                                                                                                                                                                                                                                                   |
| Article Type:                   | Research                                                                                                                                                                                                                                                                                                                                                                                                                                                                                                                              |
| Date Submitted by the Author:   | 31-Jan-2013                                                                                                                                                                                                                                                                                                                                                                                                                                                                                                                           |
| Complete List of Authors:       | Nweneke, Chidi; MRC Keneba, Cox, Sharon; London School of Hygiene & Tropical Medicine, MRC International Nutrition Group; Muhimbili Wellcome Programme, Doherty, Conor; Royal Hospital for Sick Children, Fulford, Anthony; London School of Hygiene and Tropical Medicine, MRC International Nutrition Group<br>Moore, Sophie; London School of Hygiene and Tropical Medicine, MRC International Nutrition Group<br>Prentice, Andrew; London School of Hygiene and Tropical Medicine, MRC International Nutrition Group; MRC Keneba, |
| <b>Primary Subject Heading</b>: | Haematology (incl blood transfusion)                                                                                                                                                                                                                                                                                                                                                                                                                                                                                                  |
| Secondary Subject Heading:      | Epidemiology, Nutrition and metabolism, Infectious diseases                                                                                                                                                                                                                                                                                                                                                                                                                                                                           |
| Keywords:                       | TROPICAL MEDICINE, Clinical trials < THERAPEUTICS, Anaemia < HAEMATOLOGY                                                                                                                                                                                                                                                                                                                                                                                                                                                              |
|                                 |                                                                                                                                                                                                                                                                                                                                                                                                                                                                                                                                       |

SCHOLARONE™  
Manuscripts

1  
2  
3  
4 **Randomised controlled trial of weekly chloroquine to re-establish normal erythron iron flux and**  
5  
6 **haemoglobin recovery in post-malarial anaemia**  
7  
8

9  
10 Chidi V Nweneka<sup>1</sup>, Sharon E Cox<sup>1,3</sup>, Conor P Doherty<sup>2</sup>, Anthony J Fulford<sup>1</sup>, Sophie E Moore<sup>1</sup>, Andrew M.  
11  
12 Prentice<sup>1</sup>  
13

14  
15 **Affiliations**

16  
17 Medical Research Council (MRC) International Nutrition Group, London School of Hygiene & Tropical  
18  
19 Medicine, London, UK & MRC Keneba, The Gambia (CVN, SEC, SEM, AMP)  
20  
21 Department of Paediatrics, Royal Hospital for Sick Children, Glasgow, UK (CPD)  
22  
23 Muhimbili Wellcome Programme, Muhimbili University of Health & Allied Sciences, Dar es Salaam,  
24  
25 Tanzania. (SEC)  
26  
27  
28  
29

30 **Correspondence and reprint request to:**

31  
32 Andrew M. Prentice, MRC International Nutrition Group, LSHTM, Keppel Street, London WC1E 7HT, UK.  
33  
34 E-mail: [Andrew.Prentice@lshtm.ac.uk](mailto:Andrew.Prentice@lshtm.ac.uk) Tel: +44-20-7958-8140 Fax: +44-20-7958-8111  
35  
36

37  
38 **Sources of support:** This study was supported by the UK Medical Research Council (MC-A760-5QX00).  
39  
40 The funder had no role in the design, analysis or reporting of this trial.  
41  
42  
43  
44

45 **Running head:** Chloroquine in post-malarial anaemia  
46  
47  
48

49 **Abbreviations used:** ACT, co-artemether; CQ-SP, chloroquine plus sulphadoxine-pyrimethamine; Hb,  
50  
51 haemoglobin; MCH, mean cell haemoglobin; MCV, mean cell volume; RCT, randomised controlled trial;  
52  
53 SMA, severe malarial anaemia; ZnPP, zinc protoporphyrin.  
54  
55  
56  
57  
58  
59  
60

1  
2  
3  
4 **Trial registration:** The clinical trial registration number is NCT00473837 (ClinicalTrials.gov).  
5  
6  
7  
8  
9  
10  
11  
12  
13  
14  
15  
16  
17  
18  
19  
20  
21  
22  
23  
24  
25  
26  
27  
28  
29  
30  
31  
32  
33  
34  
35  
36  
37  
38  
39  
40  
41  
42  
43  
44  
45  
46  
47  
48  
49  
50  
51  
52  
53  
54  
55  
56  
57  
58  
59  
60

For peer review only

## Abstract

**Objective:** To determine if low-dose weekly chloroquine (CQ) therapy improves recovery from malaria-associated anaemia.

**Design:** A proof of concept randomised clinical trial.

**Setting:** West Kiang District, Lower River Region, The Gambia

**Participants:** Children resident in participating communities, aged 12-72 months with uncomplicated malaria identified using active case detection over two consecutive malaria transmission seasons.

**Interventions:** In 2007 eligible children were randomised to chloroquine-sulphadoxine/pyrimethamine (CQ-SP) or co-artemether (ACT) anti-malarial therapy, and after parasite clearance on Day 3 subsequently re-randomised (double-blind) to weekly low-dose CQ (5mg/kg) or placebo. In 2008 all eligible children were treated with ACT and subsequently randomised to CQ or placebo.

**Outcome measures:** The primary outcome was change in haemoglobin from baseline (Day 3 of anti-malarial treatment) to Day 90 in the weekly CQ or placebo treatment arms. Secondary outcomes were changes in urinary neopterin as a marker of macrophage activation, markers of erythropoietic response and prevalence of sub-microscopic parasitaemia. Change in haemoglobin in the placebo arm by initial anti-malarial treatment was also assessed.

**Results:** In 2007 101 children with uncomplicated malaria were randomised to anti-malarial treatment with CQ-SP or ACT and 65 subsequently randomised to weekly CQ or placebo. In 2008 all children received ACT anti-malarial treatment and 31 subsequently randomised to weekly CQ or placebo. Follow up to Day 90 was 96%. There was no effect of weekly CQ vs. placebo on change in haemoglobin at Day 90, (CQ: +10.04 g/L [95% CI:6.66/13.42] vs. placebo: +7.61 g/L [95% CI:2.88/12.35]). There was also no effect on any of the secondary outcomes assessed, or effect of initial anti-malarial therapy on haemoglobin recovery. Higher Day 90 haemoglobin was independently correlated with older age, not being stunted, higher haemoglobin at Day 0 and adequate iron status at Day 3.

1  
2  
3 **Conclusions:** Weekly low-dose CQ after effective anti-malarial treatment is not effective in  
4  
5 improving recovery from post-malaria anaemia.  
6  
7  
8  
9  
10  
11  
12  
13  
14  
15  
16  
17  
18  
19  
20  
21  
22  
23  
24  
25  
26  
27  
28  
29  
30  
31  
32  
33  
34  
35  
36  
37  
38  
39  
40  
41  
42  
43  
44  
45  
46  
47  
48  
49  
50  
51  
52  
53  
54  
55  
56  
57  
58  
59  
60

For peer review only

## Article Focus

- To determine if 3 months of low-dose weekly chloroquine (CQ) (5mg/kg) therapy after effective treatment of uncomplicated malaria can improve haemoglobin recovery after malaria-associated anaemia in rural African children.
- To test the hypothesis that chloroquine may enhance haematologic recovery after a malaria episode through its anti-inflammatory and immuno-modulatory actions, anti-macrophageal iron loading effect, and anti-malarial effect (despite widespread resistance).

## Key Messages

- Weekly low-dose CQ after effective anti-malarial treatment was not effective in improving recovery from mild to moderate post-malaria anaemia.
- Weekly low dose CQ at 5mg/kg had no clear effects on erythropoietic responses as determined by reticulocyte percentage, or immune-mediated inflammation as assessed by urinary neopterin, a marker of macrophage activation.

## Strengths and limitations

- The strengths of this study are its randomised design and double blinding of the allocation to weekly CQ or placebo and that few subjects were lost to follow-up. The continuous follow-up and active case detection for all children ensured that malaria infections were detected early and within similar time-frames, plus resurgent or new clinical infections were excluded from the analysis of haemoglobin change. A strict malaria case definition was adhered to and the measurement of sub-microscopic parasitaemia over time allowed the effects of incomplete treatment to be modelled.
- A limitation of the study was the need to recruit participants over 2 malaria transmission seasons and the significantly reduced malaria transmission rate in 2008 which also appeared to affect the severity of malaria in terms of parasite densities at first detection and

1  
2  
3 haemoglobin concentrations, with significantly lower baseline Hb in 2008. Related to this  
4  
5 limitation is the effect on the reduced number of participants recruited in 2008.  
6

- 7  
8 • It is possible that the relatively low dose of CQ we used was insufficient to mediate the  
9  
10 effects that we were testing for and we were unable to conduct pilot studies of CQ drug  
11  
12 dosage and duration to determine the potential best treatment regime to test or of the  
13  
14 timings of evaluation of possible mechanisms of effect.  
15  
16 • The change in design in 2008 to all children receiving ACT anti-malarial treatment did not  
17  
18 affect the analysis of the primary outcome. The change did, however, limit our ability to  
19  
20 determine the effect of initial anti-malaria therapy on haemoglobin response in the placebo  
21  
22 group. An effect of anti-malarial treatment CQ on Hb, when in the context of adequate  
23  
24 parasite clearance as was observed, might have been expected to occur in the early period  
25  
26 of recovery.  
27  
28  
29  
30  
31  
32  
33  
34  
35  
36  
37  
38  
39  
40  
41  
42  
43  
44  
45  
46  
47  
48  
49  
50  
51  
52  
53  
54  
55  
56  
57  
58  
59  
60

## Introduction

The precise contribution of malaria to anaemia is difficult to calculate mainly because many anaemia-causing conditions co-exist in children living in malaria-endemic countries.<sup>1</sup> Murphy and Breman<sup>2</sup> estimate the annual incidence of severe malaria anaemia (SMA) to be 1.42 to 5.66 million resulting in between 194,000 to 974,000 deaths in children younger than five years. SMA increases the risk of death in children with malaria<sup>3</sup>, many of whom die shortly after admission before blood transfusion can be commenced<sup>4,5</sup> and after discharge in the community<sup>6</sup>. In addition, blood transfusion, the standard treatment for severe malaria anaemia exposes the child to the risk of transfusion-related infections like Human Immunodeficiency Virus (HIV) and hepatitis<sup>7</sup>. Among a nationally representative sample of children aged one to five years in The Gambia in 1999, 76% had a haemoglobin (Hb) less than 11g/dl and 15% had Hb less than 7g/dl<sup>8</sup>. It is likely that most of the cases of moderate to severe anaemia were due in great part to malaria<sup>9-11</sup>. A better understanding of the pathogenesis of malaria anaemia is required to improve its prevention and management.

Multiple immune and non-immune-mediated mechanisms cause anaemia during and after a malaria episode<sup>12</sup> including the destruction of non-parasitized erythrocytes which may account for more than 90% of erythrocyte loss<sup>13,14</sup>. One important component is inflammation-induced iron delocalisation which is characterised by sequestration of iron by the monocyte-macrophage system and hepatocytes, resulting in a state of pseudo-iron deficiency; a state that reverses after the inflammation has subsided<sup>12</sup>. The trans-membrane protein ferroportin is the exclusive route for cellular iron efflux and is responsible for releasing absorbed iron from enterocytes and sequestered iron from macrophages<sup>12,15,16</sup>. Hepcidin, the master-regulator of iron metabolism which responds both to iron status and inflammation<sup>15</sup>, blocks ferroportin. Clinically, malaria-induced inflammation has been shown to be associated with a hepcidin-mediated reduction in intestinal absorption of iron.<sup>17</sup> Inflammatory cytokines, particularly IL-6 and IL-1 stimulate hepcidin release<sup>18,19</sup> resulting both in reduced iron absorption of dietary iron and impaired macrophageal release of iron; the latter effect being quantitatively much more significant as macrophageal iron recycling and transport to the



1  
2  
3 erythron is 25-30 fold greater than the influx of dietary iron. In this way hepcidin is the mediator of  
4  
5 the anaemia of chronic disease<sup>15</sup>. TNF- $\alpha$  could also play a role in ferroportin-mediated iron transfer  
6  
7 independent of hepcidin<sup>20</sup>. Rapid resolution of malaria-induced inflammation could therefore limit  
8  
9 the degree and duration of malaria anaemia by reducing the duration of iron delocalisation.  
10

11 Chloroquine is a cheap and safe antimalarial with proven anti-inflammatory properties; and  
12  
13 has been shown to reduce iron delocalisation *in vitro*<sup>21 22</sup>. We hypothesised that chloroquine may  
14  
15 enhance haematologic recovery after a malaria episode through its anti-inflammatory and immuno-  
16  
17 modulatory actions, anti-macrophageal iron loading effect, and anti-malarial effect (despite  
18  
19 widespread resistance). We designed a proof of concept study to investigate the potential use of  
20  
21 chloroquine in the management of mild post malaria anaemia.  
22  
23  
24  
25  
26  
27  
28  
29  
30  
31  
32  
33  
34  
35  
36  
37  
38  
39  
40  
41  
42  
43  
44  
45  
46  
47  
48  
49  
50  
51  
52  
53  
54  
55  
56  
57  
58  
59  
60

## Materials and Methods

### Study Design and population

This study was a population-based randomised, controlled trial (RCT) in children aged 12 to 72 months conducted over two malaria seasons in 2007 and 2008 in West Kiang District, Lower River Region, The Gambia. The study was initially designed and conducted as a 2x2 randomised placebo-controlled trial in 2007 but had to be changed, due to changes in national malaria treatment guidelines, to a two-arm RCT during the 2<sup>nd</sup> malaria transmission season in 2008. In the 2x2 phase of the study, children with malaria were initially openly randomised to receive a therapeutic dose regime of chloroquine plus sulphadoxine-pyrimethamine (CQ-SP) or co-artemether (ACT) (Day 0). After treatment, on Day 3, children were subsequently randomised (double blind) to weekly chloroquine or placebo until Day 90 (**Figure 1**). In the two-arm phase, all enrolled children with malaria were treated with ACT and then randomised and followed up as before (**Figure 1**). A combination of active and passive case detection was used to identify children in participating communities with malaria using a standard case definition of clinical malaria (see below).

The climate of this district is typical of sub-Saharan Africa with a long dry season lasting from November to June and a relatively short rainy season lasting from July to October. Malaria transmission is seasonal, hyperendemic and follows the rainy season, occurring between July and December. The prevalence of children experiencing one or more malaria episodes among a cohort of 1002 children aged between 1-6 years under active malaria surveillance during a population-based study in 2003 was 34% (Doherty et al. Unpublished data). During the study period standard malaria control activities in the district consisted of insecticide treated bednet distribution and case finding and treatment. In 2008 the standard first-line antimalarial treatment regimen for uncomplicated malaria in The Gambia was changed from CQ-SP to co-artemether.

### *Inclusion & exclusion criteria*

Eligibility for malaria surveillance and subsequent possible enrolment into the RCT included all children in the participating communities, aged between 12 and 72 months at the start of the

1  
2  
3 surveillance period and who were not severely wasted, defined as weight-for-height Z scores less  
4  
5 than -3SD.  
6

7  
8 Inclusion criteria for enrolment included: 1) uncomplicated malaria at Day 0, defined as a  
9  
10 history of fever 48 hours prior to presentation or a measured temperature of 37.5°C or more with  
11  
12 peripheral parasitaemia (asexual forms of *P. falciparum*  $\geq 500/\mu\text{L}$  by microscopy) on Day 0 of the  
13  
14 study; and 2) for randomisation to the post-malaria intervention, children had to have a Hb between  
15  
16 69g/L - 110g/L on Day 3 with no peripheral parasitaemia.  
17

18  
19 Children were excluded from the RCT if they were: 1) unable to take oral medications; 2) had  
20  
21 features of severe malaria;<sup>1</sup> 3) had a known haemoglobinopathy; 4) were enrolled in another  
22  
23 project; 5) had already received antimalarial drugs from other sources outside the project team; or  
24  
25 6) were prescribed other drugs with potential antimalarial or anti-anaemic effects such as co-  
26  
27 trimoxazole and haematinics.  
28

29  
30 Following randomisation to weekly CQ or placebo children were withdrawn from the study  
31  
32 if: 1) they developed a second malaria episode or had life-threatening symptoms, more severe  
33  
34 disease or serious adverse reactions; 2) left the study area for more than 14 days; 3) received  
35  
36 antimalarials from other sources; or 4) Hb fell below 70g/L.  
37

### 38 ***Field and clinical procedures***

39  
40 To effect the surveillance protocol, the study villages were divided into geographically  
41  
42 adjacent clusters supervised by a resident study nurse who visited each village morning and evening  
43  
44 and provided 24-hour clinical coverage to all enrolled children in their cluster. The active surveillance  
45  
46 consisted of twice weekly temperature monitoring of enrolled children by village assistants; while  
47  
48 the passive surveillance consisted of mothers referring sick children to the visiting study nurse.  
49  
50 Children with fever – reported or measured – were screened for malaria using a rapid diagnostic test  
51  
52 (MRDT) (Cortez diagnostics, INC, USA) after clinical evaluation. Children testing negative to the  
53  
54 MRDT were treated based on the likely diagnosis from the symptoms and signs. Children testing  
55  
56 positive to the MRDT were commenced on antimalarials immediately (either CQ-SP or ACT in 2007,  
57  
58  
59  
60

1  
2  
3 and ACT in 2008 for three days) and directly observed by the study nurse and managed as  
4 appropriate. Finger prick blood samples (days 7, 15, 30 & 70) were collected in an EDTA microtainer  
5 while venous blood (2mls – days 0 & 90; and 5mls – days 3 & 45) samples were collected in an EDTA  
6 vacutainer and sent to the study laboratory on the same day. Co-morbidities were treated as  
7 appropriate, avoiding co-trimoxazole and haematinics. For the subsequent visits after initial malaria  
8 diagnosis at Day 0, children were seen by the study nurse and blood samples and clinical data  
9 collected as per protocol. Only children who fulfilled the inclusion criteria for advancement to the  
10 weekly chloroquine/weekly placebo phase of the study were sampled after Day 3. These children  
11 were also followed up on days 15, 30, 45, 70 (except in 2008) and 90.

### 22 ***Randomisation and blinding***

23  
24  
25 The randomisation to malaria treatment group in 2007 (CQ-SP or ACT) was open (non-  
26 blinded to trial staff, investigators or participants) and was done by sequential assignment as  
27 children were identified. The block randomisation to the post-malaria treatment of weekly CQ or  
28 placebo in both 2007 and 2008 was double blinded and was carried out in blocks of eight. The  
29 randomisation codes were generated by a staff member independent of the study team and held by  
30 the external trial monitor. Treatment codes were labelled A to H and placed in sequentially  
31 numbered, opaque sealed envelopes held by the study nurses. Allocation to the treatment was by  
32 matching the code in the envelope to a bottle of the intervention labelled with the same code and  
33 then labelled with the subject ID.

### 44 ***Interventions***

45  
46 For children openly randomised to malaria treatment at Day 0 with CQ-SP, children received  
47 chloroquine syrup (Chlormal®, Medreich Sterilab Ltd, Avalahalli, Bangalore, India) consisting of 50mg  
48 chloroquine base per 5mls as chloroquine phosphate at a dose of 10mg/kg for 3 days (days 0-2). SP  
49 (Micro Laboratories, India) was co-administered as a 525 mg tablet (500mg sulfadoxine and 25mg  
50 pyrimethamine) on Day 0 only at a dose of ½ tablet/10kg. Children who were randomised to ACT  
51 treatment in 2007 and all children in 2008 received co-artemether (Coartem®) tablets (Beijing  
52  
53  
54  
55  
56  
57  
58  
59  
60

1  
2  
3 Novartis Pharma Ltd, Beijing China for Novartis Pharma AG, Basle, Switzerland) as blister packets of 6  
4  
5 tablets per card with each tablet containing 20mg artemether and 120mg lumefantrine. The  
6  
7 treatment dose comprised a stat dose on Day 0 and then 8 hours later, followed by twice daily doses  
8  
9 for the next two days with doses depending on body weight (5 - <15 kg – one tablet/dose; 15 - <25kg  
10  
11 – 2 tablets/dose; 25 - <35kg – 3 tablets per dose).

12  
13  
14 During the second blinded phase of the trial children received either weekly CQ syrup (as  
15  
16 above) but at a dose of 5mg/kg or matching placebo syrup (prepared by Royal Victoria Teaching  
17  
18 Hospital pharmaceutical laboratory in collaboration with Atlantic Pharmaceuticals Limited,  
19  
20 Latrikunda Sabiji, The Gambia) The syrups were in similar amber coloured bottles with matching caps  
21  
22 and labels. Doses were administered in the child's home under direct observation by the study  
23  
24 nurses who waited for at least 10 minutes after administering the drugs to ensure that they were  
25  
26 not vomited.  
27  
28

### 29 30 **Primary and secondary outcomes**

31  
32 The primary outcome measure was Hb change from Day 3 post treatment of malaria episode  
33  
34 to Day 90 in the weekly CQ and placebo arms.  
35

36  
37 The secondary outcomes were to compare between the weekly CQ and placebo arms: (1-i)  
38  
39 changes in erythropoietic response between Day 3 and Day 30; and (1-ii) between day 3 and day 90;  
40  
41 (2) changes in urinary neopterin from Day 3 to Day 30 as a marker of macrophage activation; (3)  
42  
43 prevalence of sub-microscopic malaria parasitaemia using PCR at each time point, and; (4) Hb  
44  
45 change from Day 3 to Day 90 in the two placebo arms to investigate the effects of initial malaria  
46  
47 treatment therapy.  
48

### 49 50 **Sample size**

51  
52 During initial study design we used a working assumption of a standard deviation (SD) for  
53  
54 change in Hb of 15 g/l<sup>23</sup>. With power 80% and significance level set at 5% we estimated the sample  
55  
56 sizes required to detect varying effect sizes for the primary outcome. A sample size of 65 per arm  
57  
58  
59  
60

1  
2  
3 was estimated to be able to detect an effect size of 7.5g/l. This sample size was estimated to be  
4  
5 achievable and the effect size likely be clinically significant.  
6  
7

#### 8 **Laboratory procedures:**

9  
10 Table 1 describes the different laboratory analysis conducted. Zinc protoporphyrin (ZnPP) as  
11  
12 a marker of iron status was measured on fresh whole blood using a fluorometer (AVIV Biomedicals,  
13  
14 Lakewood, NJ, USA). Full blood count (FBC), haemoglobin and automated reticulocyte count were  
15  
16 performed using a Cell Dyne 3700 (Abbott Laboratories. Abbott Park, Illinois, USA). Iron deficiency  
17  
18 was defined using 3 parameters; mean cell volume (MCV), mean cell haemoglobin (MCH) and ZnPP.  
19  
20 The cut off values for the different parameters employed were:  $\geq 61 \mu\text{mol/mol}$  of Hb for ZnPP<sup>24</sup>,  $\leq 73 \text{fl}$   
21  
22 for MCV<sup>25</sup> and  $\leq 25 \text{pg}$  for MCH<sup>25</sup>. Combining these parameters has been shown to increase their  
23  
24 sensitivity and specificity to identify iron deficiency<sup>26</sup>. Malaria parasites were identified in a thick  
25  
26 peripheral blood smear stained with Giemsa overnight and read by light microscope with x100  
27  
28 magnification in oil immersion. Parasite DNA extraction and subsequent quantitative PCR  
29  
30 amplification were carried out using established protocols<sup>27</sup>. In brief, DNA extraction was done using  
31  
32 the Qlamp DNA Mini Kit (Qiagen<sup>TM</sup> Ltd. UK) according to the manufacturer's instructions with minor  
33  
34 modifications. Extracted DNA samples were stored at  $-20^\circ\text{C}$ . Quantification of parasite density was  
35  
36 done with a TaqMan assay employing a fluorogenic probe to detect specific parasite products and  
37  
38 using an Opticon<sup>®</sup> 2 Real Time PCR machine and Opticon<sup>TM</sup> version 3.1 software (Bio-Rad  
39  
40 Laboratories, Inc., USA). Primers and probes were synthesized by Applied Biosystems, UK. Urinary  
41  
42 neopterin levels were measured using an ELISA technique (BRAHMS Neopterin EIA, B.R.A.H.M.S,  
43  
44 Germany). The stored urine was allowed to thaw at room temperature and then diluted 1:100 and  
45  
46 the rest of the procedure was according to the manufacturer's instructions.  
47  
48  
49

#### 50 **Statistical analysis:**

51  
52 Summary statistics are presented as means and standard deviations (SD) for normally  
53  
54 distributed continuous variables, and counts and percentages for discrete variables. Neopterin and  
55  
56 parasite count were not normally distributed and were log transformed ( $\log_e$  for neopterin and  $\log_{10}$   
57  
58  
59  
60

1  
2  
3 for parasite count). The geometric means and 95% confidence intervals are presented for log-  
4  
5 transformed variables. Two-sided student's t tests were used to compare results between two  
6  
7 treatment arms.  
8

9  
10 Visual inspection of Hb change between baseline at Day 3 and later time points by treatment  
11  
12 arm suggested that by Day 30, Hb change in both treatment arms had reached a plateau. Therefore  
13  
14 Hb data from Day 30 to Day 90 were pooled for subsequent analysis. This pooled Hb is referred to as  
15  
16 'final Hb'. To fully determine the effect of treatment group on Hb change we used random effects  
17  
18 models. Initial malaria treatment group (CQ-SP vs ACT), Hb at recruitment (Day 0 Hb), baseline Hb  
19  
20 (Day 3), age in months, year of study, and the child's village were included in models "*a-priori*" and  
21  
22 hence adjusted for.  
23

24  
25 Linear regression was used to investigate further potential predictors of Hb change in the  
26  
27 study population. First, simple linear regression was used to assess the association of each predictor  
28  
29 variable with Hb. Thereafter, all variables with a P-value of 0.1 or less were included in a multiple  
30  
31 linear regression to assess confounding. The final regression model consisted of only the variables  
32  
33 that maintained a significant association with Hb in the multiple regression models. All analyses  
34  
35 were carried out using STATA version 8 (StataCorp, College Station, TX, USA).  
36

### 37 38 **Ethical clearance**

39  
40 The Scientific Coordinating Committee of the Medical Research Council (UK), The Gambia,  
41  
42 and the MRC/Gambia Government Joint Ethical Committee approved the study (SCC 1076). Written  
43  
44 informed consent was obtained from parents/guardians of the children prior to enrolment. The  
45  
46 clinical trial registration number is NCT00473837 (ClinicalTrials.gov).  
47  
48  
49  
50  
51  
52  
53  
54  
55  
56  
57  
58  
59  
60

## Results

### Characteristics of the study population under malaria surveillance

**Figure 1** describes the flow of participants and reasons for exclusions in the study. In 2007, 1445 of 1817 (80%) potentially eligible children identified through the Keneba MRC DSS database from 14 villages were included in the malaria surveillance. In 2008, 1220 of the 1413 (86%) identified children from 5 of the original villages were included in the malaria surveillance (smaller villages were excluded as they had contributed few cases in 2007). **Table 2** describes the characteristics of the children placed under surveillance for malaria. The proportion of children with a positive malaria rapid test during surveillance (only first event per child counted) fell from 7.3% (105/1445) in 2007 to 4% (49/1220) in 2008. In the first year of the study, 101 (96%) of the children with a positive malaria rapid test were randomised to CQ-SP or ACT treatment, and 65 (64%) subsequently randomised at Day 3 to weekly chloroquine or placebo, with all children completing follow up until Day 30 and 33/34 completing follow-up until Day 90 in the weekly CQ and 28/31 in the weekly placebo group. In the second year of the study 31 of the 49 (63%) cases with a first positive malaria rapid test were subsequently randomised to weekly CQ or placebo after treatment with ACT, all of whom completed follow up until Day 90 (16 CQ & 15 placebo). After determining a lack of change between Day 30 and Day 90 Hb measurements across all treatment groups it was decided to include the 4 children who were excluded after Day 30 of follow-up due to development of a second malarial episode, in the analysis of “final Hb” by use of Hb at Day 30. Thus 96 children were included in the analysis of the primary and secondary outcomes, except for the analysis of effect of initial malaria treatment within the placebo arms which included 31 children.

**Table 3** describes the characteristics of participants randomised to weekly chloroquine and weekly placebo for both years combined. Demographic and anthropometric characteristics were similar between the groups as was baseline Hb at Day 3. The prevalence of iron deficiency measured at baseline was 43.1% (28/65) in 2007 and 58.1% (18/31) in 2008 with a similar prevalence between the CQ/placebo groups within each year (data not shown) and in both years combined. However



1  
2  
3 parasite density was lower in the placebo group (**Table 3**). No adverse events were reported in  
4  
5 either treatment group.  
6

### 7 8 **Effect of weekly CQ on haemoglobin change during follow-up**

9  
10 To assess the effect of weekly chloroquine on Hb recovery after clearance of peripheral  
11  
12 parasitaemia, we compared change in Hb from Day 3 to Day 90 and Day 3 to Day 30 in the two arms.  
13  
14 No significant differences in Hb change between the two groups were observed, either for the data  
15  
16 pooled for both study years or for each study year separately (Day 90, CQ: +10.04 g/L [95% CI:6.66,  
17  
18 13.42] vs. placebo: +7.61 g/L [95% CI:2.88, 12.35]) (**Figure 2**). However, at Day 15, children receiving  
19  
20 weekly CQ had an increase of 3.5 g/L (95% CI: 0.5, 6.4) compared to 0.8g/L (95% CI: -2.3, 3.9) in  
21  
22 children in the placebo arm, but this difference did not reach statistical significance ( $p=0.2$ ). The  
23  
24 overall result was unchanged when adjusting for factors determined '*a priori*' (Hb at recruitment  
25  
26 (Day 0), Hb at baseline (Day 3), age (in months), year of study, initial treatment received (CQ-SP vs  
27  
28 ACT), and village group) using a random effects model. Furthermore, adding parasite density at  
29  
30 recruitment, presence of sub-microscopic parasitaemia at any time point during follow-up, and  
31  
32 presence of iron deficiency had no effect on the estimates of effect for CQ vs. placebo treatment  
33  
34 during follow-up (data not shown).  
35  
36

### 37 38 **Predictors of final haemoglobin at Day 90**

39  
40 In the absence of an effect of weekly CQ on Hb change after successful malaria treatment,  
41  
42 we assessed what other factors might determine final Hb. Using simple linear regression significant  
43  
44 positive associations were observed for parasite density at Day 0, better nutritional status, age, Hb  
45  
46 at Day 0 at malaria diagnosis and Day 3 of successful treatment. Presence of iron deficiency at  
47  
48 baseline was associated with significantly lower final Hb. There was no apparent effect of initial  
49  
50 malaria treatment (CQ-SP vs. ACT) (**Table 4a**). In a final multiple regression model, Hb at Day 0 was  
51  
52 the strongest predictor of final Hb and other independent predictors of final haemoglobin were  
53  
54 presence of iron deficiency at Day 3, degree of stunting (height-for-age Z score), and age (in  
55  
56  
57  
58  
59  
60

1  
2  
3 months). Children with higher Hb at diagnosis and older children had greater final Hb. Children with  
4 iron deficiency at Day 3 had significantly lower final Hb with a mean difference of 12.1g/L (**Table 4b**).

### 8 **Effect of initial anti-malaria treatment (CQ-SP vs ACT) on haemoglobin change**

9  
10 A secondary outcome of this study was Hb change from Day 3 to Day 30 and Day 90 in the  
11 placebo arm to determine whether initial anti-malaria treatment (CQ-SP or ACT) treatment affected  
12 macrophage iron loading in acute clinical malaria and its subsequent release. **Figure 3** depicts Hb  
13 change during follow up from Day 0 to Day 90 in the placebo arm by initial antimalarial treatment  
14 received. From Day 30 onwards there was a larger response in children who received anti-malaria  
15 therapy with CQ-SP compared to ACT. However, the drop in Hb from Day 0 to Day 3 and Day 7 in  
16 children who were initially treated with ACT was smaller than the drop in children initially treated  
17 with CQ-SP, although the difference was not significant resulting in similar levels of final Hb as  
18 indicated in the analysis to determine independent predictors of final Hb, in which Hb at Day 0 was  
19 the strongest predictor.  
20  
21  
22  
23  
24  
25  
26  
27  
28  
29  
30

### 31 **Sub-microscopic parasitaemia, inflammation, bone marrow response, haemoglobin change and** 32 **treatment groups**

33  
34  
35  
36 Sub-microscopic parasitaemia was commonest in the first seven days of acute phase follow  
37 up (days 3-15). By Day 30, most were negative (77%). The prevalence of sub-microscopic  
38 parasitaemia at days 30 and 90 combined was 15.1% and there was no evidence of an effect of post-  
39 malaria treatment group or of initial anti-malarial treatment (**Figure 4a & 4b**). Most of the sub-  
40 microscopic parasitaemia at these time points was of a very low level (one to two parasites per  
41 microliter). However, higher parasite density at diagnosis was associated with an increased  
42 likelihood of subsequent sub-microscopic parasitaemia at day 30 or 90 with a one log increase in  
43 parasite count increasing the odds of having sub-microscopic parasitaemia by 1.6 (P=0.005).  
44  
45  
46  
47  
48  
49  
50  
51  
52  
53 Although the presence/absence of sub-microscopic parasitaemia during follow up (days 30 & 90)  
54 was not associated with final Hb (**Table 4**), in children with high qPCR (quantitative PCR parasite  
55 count) parasite count (> 500/ $\mu$ L, N=3) at Day 30, Hb at Day 30 was significantly lower compared to  
56  
57  
58  
59  
60

1  
2  
3 children with one to two parasites/ $\mu$ L or none at Day 30 (82.3g/L vs 102.8g/L;  $p = 0.01$ ). Similarly, the  
4  
5 mean Hb change was also reduced in those with persistent high parasitaemia at Day 30 (-5.0g/L vs.  
6  
7 8.5g/L; mean Hb difference (95%CI): 13.5g/L (-0.3, 27.3);  $p = 0.06$ ). Bone marrow response as  
8  
9 assessed by percentage of reticulocytes peaked at Day 15 (4.5% in both treatment groups  
10  
11 combined), compared to similar levels of around 2% at all other measured time points (Days 3, 7, 15  
12  
13 & 90). There was no evidence of an effect of either post-malaria treatment group or of initial anti-  
14  
15 malarial therapy (**Figure 5**) on bone marrow response (data not shown). Urinary neopterin, a  
16  
17 product of activated macrophages and therefore a marker of a pro-inflammatory immune status,  
18  
19 was strongly associated with qPCR parasite count at Day 30 (regression coefficient: 0.2 (95%CI: 0.08,  
20  
21 0.33),  $p = 0.003$ ; adjusted  $R^2 = 0.4091$ ) and was also associated with Hb at Day 30. There was no  
22  
23 evidence of an effect of post-malaria treatment group or of initial anti-malarial treatment on  
24  
25 neopterin concentrations (**Figure 6a & 6b**).  
26  
27  
28  
29  
30  
31  
32  
33  
34  
35  
36  
37  
38  
39  
40  
41  
42  
43  
44  
45  
46  
47  
48  
49  
50  
51  
52  
53  
54  
55  
56  
57  
58  
59  
60

## Discussion

Chloroquine is used in the treatment of several diseases in addition to its antimalarial use<sup>28</sup>  
<sup>29</sup>. However, we believe this to be the first study to assess its potential role in the management of  
post-malaria anaemia. We hypothesised that since malarial anaemia is essentially a systemic  
inflammatory response to infection<sup>12</sup>, chloroquine, by suppressing plasmodium-induced  
inflammation, could enhance erythropoietic recovery. We tested this hypothesis by comparing two  
groups of children – one group receiving weekly chloroquine and the other group weekly placebo  
after complete clearance of peripheral parasitaemia as determined by microscopy. The primary  
outcome measure was the recovery in Hb at Days 30 and 90 compared to Day 3 Hb levels. Our  
results showed no significant difference in the Hb change between the two groups. The data was  
interrogated further by a random effects model taking into account random measurement errors  
and missing data. This confirmed that weekly chloroquine at 5mg/kg body weight did not improve  
Hb recovery after uncomplicated clinical malaria. There was a suggestion that weekly CQ may have  
increased the rate of recovery in Hb change at Day 15 accompanied by non-significantly increased  
reticulocyte percentage.

A limitation of the study was the need to recruit participants over 2 malaria transmission  
seasons. In 2008 there was a reduced malaria transmission rate and thus fewer cases available for  
recruitment and also an apparent effect on the severity of malaria in terms of parasite densities at  
first detection and effect on haemoglobin concentrations, with a significantly higher baseline Hb in  
2008. However, the change in design that was necessitated in 2008 did not change the primary  
outcome analysis .

The change in design in 2008 to all children receiving ACT anti-malarial treatment did not  
affect the analysis of the primary outcome. The change did, however, limit our ability to determine  
the effect of initial anti-malaria therapy on haemoglobin response in the placebo group. An effect of  
anti-malarial treatment CQ on Hb, when in the context of adequate parasite clearance as was  
observed, might have been expected to occur in the early period of recovery.

1  
2  
3 The recommended anti-inflammatory dose of CQ is 3-4mg/kg/day. However, due to lack of  
4 safety data for this condition and considering potential adverse effects, particularly retinal damage,  
5 we used the lower prophylactic dose of 5mg/kg/week. Using this low dose might have contributed  
6 to our inability to detect an effect of CQ. Drenou et al<sup>30</sup> reported the successful control of  
7 sideroblastic anaemia (a condition of reduced incorporation of iron into haem in the presence of  
8 sufficient or high iron) was for six years on 100mg daily chloroquine without need for blood  
9 transfusion.

10 We had hypothesized that chloroquine will impede macrophageal iron sequestration during  
11 the acute clinical episode and improve iron availability for the process of erythropoiesis. Urinary  
12 excretion of neopterin is markedly increased in individuals infected with malaria, and corresponds to  
13 concurrent activation of T cells and macrophages<sup>31-33</sup>. We measured the urinary neopterin at Days 3,  
14 15 and 30 and expected to see a more rapid decline in neopterin level in the weekly chloroquine  
15 group than in the weekly placebo group; but no difference between the treatment groups was  
16 observed. It is possible that a difference may have occurred at an intermediate time point between  
17 Day 3 and Day 15, when levels had already almost normalised. Indeed, Brown et al<sup>33</sup> showed that in  
18 a group of volunteers experimentally infected with *plasmodium* parasites, the timing of maximum  
19 neopterin excretion coincided with the treatment and elimination of parasitaemia. In our study, this  
20 would coincide with study Days 0 to 3. In future, it might be more informative to carry out more  
21 measurements during the first week of malaria diagnosis.

22 The participants were followed up for 90 days because reports had suggested that Hb  
23 continues to fall even after successful malaria treatment primarily due to continuing inflammation<sup>34</sup>  
24<sup>35</sup>. In this study we found no evidence of persistent inflammation, except in the few cases with  
25 remaining parasitaemia at Day 30, who also had decreased absolute Hb and Hb change at Day 30  
26 compared with children with no parasitaemia or parasite counts of 1-2/microlitre.

27 Our observation that children with higher Hb at diagnosis had greater Hb recovery is  
28 potentially paradoxical as one would have expected the reverse through statistical regression to the  
29

1  
2  
3 mean and greater 'catch up' in children with lower starting Hb at Day 3. However, as the majority of  
4 iron used for Hb recovery is recycled<sup>24</sup>, those with higher Hb at Day 0 have more iron available for  
5 recovery. Our non-provision of exogenous iron during the study may have restricted the ability of  
6 the more anaemic children to respond appropriately as suggested by our observation of reduced Hb  
7 recovery in children with apparent iron deficiency at Day 0. An earlier study in Gambian children  
8 showed improved haematological recovery in children treated for malaria and co-supplemented  
9 with iron compared to placebo<sup>36</sup>. However, we have also shown in Gambian children reduced iron  
10 absorption from supplementation in post-malarial anaemia, whilst also experiencing greater Hb  
11 recovery compared to supplemented children with iron-deficiency anaemia. Thus causing us to  
12 question the efficacy of iron supplementation given within 2 weeks of anti-malarial treatment<sup>24</sup>.  
13 Without the inclusion of a further randomised treatment arm of post-malarial treatment iron  
14 supplementation it is not possible to make further recommendations concerning the recent  
15 argument for the provision of iron supplementation to children in malaria endemic areas with  
16 regular malaria surveillance and treatment facilities<sup>37</sup>.

17  
18  
19  
20  
21  
22  
23  
24  
25  
26  
27  
28  
29  
30  
31  
32  
33  
34 Our finding that stunted children recovered Hb poorly is consistent with an earlier report of  
35 stunting being a determinant of the severity of malaria-associated anaemia<sup>38</sup>. In our population this  
36 effect was independent of iron status.

37  
38  
39  
40 Age has been shown to be strongly associated with risk of severe anaemia in children with  
41 acute malaria; the risk decreasing with increasing age<sup>39</sup>. In addition, we have shown in this study that  
42 older children recover better from anaemia after an acute malaria episode than younger children.  
43 Paying special attention to younger children with malaria anaemia could reduce malaria related  
44 mortality in children.

45  
46  
47  
48  
49  
50  
51 In conclusion, weekly chloroquine administered for three months to children with mild  
52 malaria anaemia at a dose of 5mg/kg/week resulted in no improvement in erythropoietic recovery  
53 compared to placebo. Older children, children with higher initial Hb, less stunting at diagnosis, and  
54 without iron deficiency had better Hb recovery post-malaria. Similar to other reports in the  
55  
56  
57  
58  
59  
60

1  
2  
3 literature, urinary neopterin was elevated during acute malaria. The role of iron deficiency in  
4 erythropoietic recovery post malaria noted in this study suggests areas for further detailed  
5 investigation of the clinical value in administering both antimalarial and iron supplementation to  
6 children with malaria anaemia residing in areas of high iron deficiency and malaria burden.  
7  
8  
9  
10  
11  
12  
13  
14  
15  
16  
17  
18  
19  
20  
21  
22  
23  
24  
25  
26  
27  
28  
29  
30  
31  
32  
33  
34  
35  
36  
37  
38  
39  
40  
41  
42  
43  
44  
45  
46  
47  
48  
49  
50  
51  
52  
53  
54  
55  
56  
57  
58  
59  
60

For peer review only

### Acknowledgements

The authors wish to acknowledge the contribution of all the members of the field team – Kabiru Ceesay, Edrisa Sinjanka, Lamin Ceesay, Lamin Sowe, Kalilu Sanneh, Bakary Sarr, Muhammed Sidibeh, Yahya Sanyang, the data staff especially Jahid Hassan and Musa Jarjou, the laboratory staff especially Musa Colley, Karamo Camara, Mustapha Bittaye, and Ebrimah Danso, all the drivers of the MRC Keneba, Ms Cheryl Eniyou O, Mrs Fatou Noho, Ms Jankey Jagne, all the village assistants, and the study subjects and their parents.

### Authorship contributions

CVN, CPD and AMP conceived the study with input from SEC. CVN led all practical aspects of the work with logistic and funding support from SEM and AMP. CVN, SEC and AJF were responsible for the statistical analysis and interpretation. CVN and SEC drafted the paper with input and approval from all authors.

### Disclosure of Conflicts of Interest

The authors have no conflict of interest.

### Data sharing

The original dataset is available on request to the corresponding author and permission is dependent on the nature and purpose of intended use.

### References

1. Severe falciparum malaria. World Health Organization, Communicable Diseases Cluster. *Trans R Soc Trop Med Hyg* 2000;94 Suppl 1:S1-90.
2. Murphy SC, Breman JG. Gaps in the childhood malaria burden in Africa: cerebral malaria, neurological sequelae, anemia, respiratory distress, hypoglycemia, and complications of pregnancy. *Am J Trop Med Hyg* 2001;64(1-2 Suppl):57-67.
3. Brabin BJ, Premji Z, Verhoeff F. An analysis of anemia and child mortality. *J Nutr* 2001;131(2S-2):636S-45S; discussion 46S-48S.
4. Bojang KA, Palmer A, Boele van Hensbroek M, Banya WA, Greenwood BM. Management of severe malarial anaemia in Gambian children. *Trans R Soc Trop Med Hyg* 1997;91(5):557-61.
5. Mulenga M, Malunga F, Bennett S, Thuma PE, Shulman C, Fielding K, et al. A randomised, double-blind, placebo-controlled trial of atovaquone-proguanil vs. sulphadoxine-pyrimethamine in



- 1  
2  
3 the treatment of malarial anaemia in Zambian children. *Trop Med Int Health*  
4 2006;11(11):1643-52.
- 5 6. Phiri KS, Calis JC, Faragher B, Nkhoma E, Ng'oma K, Mangochi B, et al. Long term outcome of  
6 severe anaemia in Malawian children. *PLoS ONE* 2008;3(8):e2903.
- 7 7. Lackritz EM. Prevention of HIV transmission by blood transfusion in the developing world:  
8 achievements and continuing challenges. *Aids* 1998;12 Suppl A:S81-6.
- 9 8. NaNA. Nationwide survey on the prevalence of Vitamin A and Iron deficiency in women and  
10 children in The Gambia. National Nutrition Survey. Banjul: National Nutrition  
11 Agency/Medical Research Council, 2001.
- 12 9. Abdalla SH. Iron and folate status in Gambian children with malaria. *Ann Trop Paediatr*  
13 1990;10(3):265-72.
- 14 10. Bojang KA, Van Hensbroek MB, Palmer A, Banya WA, Jaffar S, Greenwood BM. Predictors of  
15 mortality in Gambian children with severe malaria anaemia. *Ann Trop Paediatr*  
16 1997;17(4):355-9.
- 17 11. Brewster DR, Greenwood BM. Seasonal variation of paediatric diseases in The Gambia, west  
18 Africa. *Ann Trop Paediatr* 1993;13(2):133-46.
- 19 12. Nweneka CV, Doherty CP, Cox S, Prentice A. Iron delocalisation in the pathogenesis of malarial  
20 anaemia. *Trans R Soc Trop Med Hyg* 2010;104(3):175-84.
- 21 13. Evans KJ, Hansen DS, van Rooijen N, Buckingham LA, Schofield L. Severe malarial anemia of low  
22 parasite burden in rodent models results from accelerated clearance of uninfected  
23 erythrocytes. *Blood* 2006;107(3):1192-9.
- 24 14. Price RN, Simpson JA, Nosten F, Luxemburger C, Hkirjaroen L, ter Kuile F, et al. Factors  
25 contributing to anemia after uncomplicated falciparum malaria. *Am J Trop Med Hyg*  
26 2001;65(5):614-22.
- 27 15. Ganz T. Molecular pathogenesis of anemia of chronic disease. *Pediatr Blood Cancer*  
28 2006;46(5):554-7.
- 29 16. Ganz T. Heparin and its role in regulating systemic iron metabolism. *Hematology Am Soc*  
30 *Hematol Educ Program* 2006:29-35, 507.
- 31 17. Prentice AM, Doherty CP, Abrams SA, Cox SE, Atkinson SH, Verhoef H, et al. Heparin is the major  
32 predictor of erythrocyte iron incorporation in anemic African children. *Blood*  
33 2012;119(8):1922-8.
- 34 18. Nemeth E, Rivera S, Gabayan V, Keller C, Taudorf S, Pedersen BK, et al. IL-6 mediates  
35 hypoferrremia of inflammation by inducing the synthesis of the iron regulatory hormone  
36 hepcidin. *J Clin Invest* 2004;113(9):1271-6.
- 37 19. Lee P, Peng H, Gelbart T, Wang L, Beutler E. Regulation of hepcidin transcription by interleukin-1  
38 and interleukin-6. *Proc Natl Acad Sci U S A* 2005;102(6):1906-10.
- 39 20. Atkinson SH, Rockett KA, Morgan G, Bejon PA, Sirugo G, O'Connell MA, et al. Tumor necrosis  
40 factor SNP haplotypes are associated with iron deficiency anemia in West African children.  
41 *Blood* 2008;112(10):4276-83.
- 42 21. Legssyer R, Ward RJ, Crichton RR, Boelaert JR. Effect of chronic chloroquine administration on  
43 iron loading in the liver and reticuloendothelial system and on oxidative responses by the  
44 alveolar macrophages. *Biochem Pharmacol* 1999;57(8):907-11.
- 45 22. Ghigo D, Aldieri E, Todde R, Costamagna C, Garbarino G, Pescarmona G, et al. Chloroquine  
46 stimulates nitric oxide synthesis in murine, porcine, and human endothelial cells. *J Clin Invest*  
47 1998;102(3):595-605.
- 48 23. Atkinson SH, Rockett K, Sirugo G, Bejon PA, Fulford A, O'Connell MA, et al. Seasonal childhood  
49 anaemia in West Africa is associated with the haptoglobin 2-2 genotype. *PLoS Med*  
50 2006;3(5):e172.
- 51 24. Doherty CP, Cox SE, Fulford AJ, Austin S, Hilmers DC, Abrams SA, et al. Iron incorporation and  
52 post-malaria anaemia. *PLoS One* 2008;3(5):e2133.
- 53  
54  
55  
56  
57  
58  
59  
60

- 1  
2  
3  
4  
5  
6  
7  
8  
9  
10  
11  
12  
13  
14  
15  
16  
17  
18  
19  
20  
21  
22  
23  
24  
25  
26  
27  
28  
29  
30  
31  
32  
33  
34  
35  
36  
37  
38  
39  
40  
41  
42  
43  
44  
45  
46  
47  
48  
49  
50  
51  
52  
53  
54  
55  
56  
57  
58  
59  
60
25. Worwood M. The laboratory assessment of iron status--an update. *Clin Chim Acta* 1997;259(1-2):3-23.
  26. Hershko C, Bar-Or D, Gaziel Y, Naparstek E, Konijn AM, Grossowicz N, et al. Diagnosis of iron deficiency anemia in a rural population of children. Relative usefulness of serum ferritin, red cell protoporphyrin, red cell indices, and transferrin saturation determinations. *Am J Clin Nutr* 1981;34(8):1600-10.
  27. Nwakanma DC, Gomez-Escobar N, Walther M, Crozier S, Dubovsky F, Malkin E, et al. Quantitative detection of Plasmodium falciparum DNA in saliva, blood, and urine. *J Infect Dis* 2009;199(11):1567-74.
  28. Cooper RG, Magwere T. Chloroquine: novel uses & manifestations. *Indian J Med Res* 2008;127(4):305-16.
  29. Wallace DJ. The use of chloroquine and hydroxychloroquine for non-infectious conditions other than rheumatoid arthritis or lupus: a critical review. *Lupus* 1996;5 Suppl 1:S59-64.
  30. Drenou B, Guyader D, Turlin B, Fauchet R. Treatment of sideroblastic anemia with chloroquine. *N Engl J Med* 1995;332(9):614.
  31. Reibnegger G, Boonpucknavig V, Fuchs D, Hausen A, Schmutzhard E, Wachter H. Urinary neopterin is elevated in patients with malaria. *Trans R Soc Trop Med Hyg* 1984;78(4):545-6.
  32. Fuchs D, Hausen A, Reibnegger G, Werner ER, Dierich MP, Wachter H. Neopterin as a marker for activated cell-mediated immunity: application in HIV infection. *Immunol Today* 1988;9(5):150-5.
  33. Brown AE, Herrington DA, Webster HK, Clyde DF, Szein MB, Davis JR, et al. Urinary neopterin in volunteers experimentally infected with Plasmodium falciparum. *Trans R Soc Trop Med Hyg* 1992;86(2):134-6.
  34. Dondorp AM, Nyanoti M, Kager PA, Mithwani S, Vreeken J, Marsh K. The role of reduced red cell deformability in the pathogenesis of severe falciparum malaria and its restoration by blood transfusion. *Trans R Soc Trop Med Hyg* 2002;96(3):282-6.
  35. Biemba G, Gordeuk VR, Thuma PE, Mabeza GF, Weiss G. Prolonged macrophage activation and persistent anaemia in children with complicated malaria. *Trop Med Int Health* 1998;3(1):60-5.
  36. van Hensbroek MB, Morris-Jones S, Meisner S, Jaffar S, Bayo L, Dackour R, et al. Iron, but not folic acid, combined with effective antimalarial therapy promotes haematological recovery in African children after acute falciparum malaria. *Trans R Soc Trop Med Hyg* 1995;89(6):672-6.
  37. Ojukwu JU, Okebe JU, Yahav D, Paul M. Oral iron supplementation for preventing or treating anaemia among children in malaria-endemic areas. *Cochrane Database Syst Rev* 2009(3):CD006589.
  38. Verhoef H, West CE, Veenemans J, Beguin Y, Kok FJ. Stunting may determine the severity of malaria-associated anemia in African children. *Pediatrics* 2002;110(4):e48.
  39. Reyburn H, Mbatia R, Drakeley C, Bruce J, Carneiro I, Olomi R, et al. Association of transmission intensity and age with clinical manifestations and case fatality of severe Plasmodium falciparum malaria. *Jama* 2005;293(12):1461-70.

1  
2  
3  
4  
5  
6  
7  
8  
9  
10  
11  
12  
13  
14  
15  
16  
17  
18  
19  
20  
21  
22  
23  
24  
25  
26  
27  
28  
29  
30  
31  
32  
33  
34  
35  
36  
37  
38  
39  
40  
41  
42  
43  
44  
45  
46  
47  
48  
49  
50  
51  
52  
53  
54  
55  
56  
57  
58  
59  
60

For peer review only

## TABLES

Table 1: Laboratory investigations conducted

| Investigations                                     | Specimen | Days collected <sup>†</sup>      | Purpose                                                                    |
|----------------------------------------------------|----------|----------------------------------|----------------------------------------------------------------------------|
| Microscopy for malaria parasite                    | Blood    | Days 0, 3, 7, 15, 30, 45, 70, 90 | To assess parasitaemia                                                     |
| Erythrocyte zinc protoporphyrin                    | Blood    | Days 0 & 3                       | To assess iron status                                                      |
| Full blood count                                   | Blood    | Days 0, 3, 7, 15, 30, 45, 70, 90 | To assess Hb change over time                                              |
| Automated reticulocyte percentage                  | Blood    | Days 3, 7, 15, 30, 45, 70, 90    | To monitor bone marrow response                                            |
| Quantitative PCR for <i>P.falciparum</i> parasites | Blood    | Days 0, 3, 7, 15, 30, 45, 70, 90 | To assess sub-microscopic parasitaemia                                     |
| Urinary neopterin concentration                    | Urine    | Days 3, 15, 30                   | To assess macrophage activation as measure of immune mediated inflammation |

<sup>†</sup> No blood was collected on days 7 and 70 in 2008

**Table 2: Baseline characteristics of all participants under surveillance**

|                                                                         | 2007         | 2008         | Combined     |
|-------------------------------------------------------------------------|--------------|--------------|--------------|
|                                                                         | N=1445       | N=1220       | N=2665       |
| Mean Age in months (SD)                                                 | 42.2 (17.2)  | 40.7 (17.7)  | 41.5 (17.5)  |
| Mean Weight-for-Height Z-scores (SD)                                    | -1.06 (0.84) | -1.02 (0.85) | -1.04 (0.84) |
| Mean Weight-for-Age Z-scores (SD)                                       | -1.48 (0.97) | -1.50 (0.94) | -1.49 (0.95) |
| Mean Height-for-Age Z-scores (SD)                                       | -1.06 (1.21) | -1.17 (1.13) | -1.11 (1.17) |
| Mean Body Mass Index (kg/m <sup>2</sup> ) (SD)                          | 14.6 (1.3)   | 14.7 (1.4)   | 14.6 (1.4)   |
| Prevalence of a malaria rapid test positive result during surveillance* | 105 (7.3)    | 49 (4.0)     | 154 (5.8)    |

\*only the first positive result is counted.

**Table 3: Baseline characteristics of children randomised to weekly chloroquine and weekly placebo in 2007 and 2008, pooled**

| Parameter                                                            | Chloroquine group<br>N=50  | Placebo group<br>N=46        |
|----------------------------------------------------------------------|----------------------------|------------------------------|
| Male sex (%)                                                         | 28 (56.0)                  | 24 (52.2)                    |
| Age in months, mean (SD)                                             | 41.9 (18.1)                | 38.7 (17.8)                  |
| Height-for-Age Z-scores, mean (SD)                                   | -1.19 (0.91)               | -0.94 (1.20)                 |
| Weight-for-Age Z-scores, mean (SD)                                   | -1.44 (0.95)               | -1.35 (0.87)                 |
| Weight-for-Height z scores, mean (SD)                                | -0.94 (0.90)               | -0.96 (0.79)                 |
| BMI (kg/m <sup>2</sup> ), mean (SD)                                  | 14.7 (1.4)                 | 14.7 (1.3)                   |
| Parasite density at recruitment (day 0),<br>geometric mean, (95% CI) | 47,783<br>(31,617 - 71120) | 32,496<br>(21,910, - 47,507) |
| Hb [g/L] at recruitment (Day 0), mean (SD)                           | 103.9 (14.2)               | 101.5 (14.8)                 |
| Hb [g/L] at baseline (Day 3), mean (SD)                              | 93.4 (9.6)                 | 93.7 (10.2)                  |
| Iron deficient <sup>1</sup> at baseline (Day 3) (%)                  | 23 (46)                    | 23 (50)                      |

<sup>1</sup> Iron deficiency was defined as  $Z_{\text{np}} \geq 61 \mu\text{mol/mol}$  of Hb &  $\text{MCV} \leq 73 \text{fl}$  &  $\text{MCH} \leq 25 \text{pg}$

**Table 4a: Predictors of final haemoglobin at day 90 using univariable linear regression**

| Parameter                                                                   | Regression coefficient (95%CI) | P-value |
|-----------------------------------------------------------------------------|--------------------------------|---------|
| Parasite count at recruitment (day 0)                                       | 3.5 (1.1, 5.8)                 | 0.004   |
| Sex                                                                         | -0.4 (-3.3, 2.5)               | 0.8     |
| Iron deficiency at baseline (day 3)                                         | -12.1 (-14.7, -9.5)            | <0.001  |
| Height-for-Age Z-scores (HAZ) <-2                                           | 3.2 (1.8, 4.6)                 | <0.001  |
| Weight-for-Age Z-scores (WAZ) <-2                                           | 2.6 (1.0, 4.2)                 | 0.001   |
| Weight-for-Height (WHZ) z scores <-2                                        | 0.1 (-1.6, 1.8)                | 0.9     |
| Age in months                                                               | 0.4 (0.3, 0.4)                 | <0.001  |
| Initial anti-malaria treatment arm                                          | 1.2 (-2.1, 4.4)                | 0.5     |
| CQ vs. placebo randomisation group                                          | -0.5 (-3.4, 2.5)               | 0.8     |
| Hb [g/L] at recruitment (day 0)                                             | 0.6 (0.5, 0.6)                 | <0.001  |
| Hb [g/L] at baseline (day 3)                                                | 0.7 (0.6, 0.8)                 | <0.001  |
| Village                                                                     | 1.9 (0.9, 3.0)                 | <0.001  |
| Presence of sub-microscopic parasitaemia at any time point during follow-up | 0.6 (-7.1, 8.2)                | 0.9     |
| Year of study                                                               | -1.3 (-4.4, 1.8)               | 0.4     |

**Table 4b: Independent predictors of final haemoglobin (day 90) using multivariable linear regression**

| <b>Parameter</b>            | <b>Regression coefficient<br/>(95% CI)</b> | <b>P value</b> |
|-----------------------------|--------------------------------------------|----------------|
| Day 0 Hb                    | 0.44 (0.36-0.52)                           | <0.001         |
| Presence of iron deficiency | -3.0 (-5.57, -0.43)                        | 0.022          |
| Height-for-age Z score <-2  | 1.48 (0.41, 2.56)                          | 0.007          |
| Age in months               | 0.21 (0.14, 0.28)                          | <0.001         |

*Model: Adjusted  $r^2=0.46$ ,  $F=76.6$ ,  $Prob>F <0.001$*



## Figure Legends

Figure 1: CONSORT Flow Diagram describing participants' movements in 2007 & 2008

Figure 2 Mean change in haemoglobin concentration at day 30 and day 90 from baseline at day 3 by treatment group for each year of study and for both years combined.

*Error bars represent the 95% confidence intervals*

Figure 3 Mean change in hemoglobin in the placebo arm by initial anti-malarial treatment group in 2007 study.

*Change in Hemoglobin at day 3 is compared to haemoglobin concentration at presentation with malaria and initiation of anti-malaria treatment. Thereafter the comparison is with baseline levels at day 3 after completion of anti-malarial treatment. Error bars represent the 95% confidence intervals*

Figure 4a. Percentage of participants with sub-microscopic malaria (qPCR) over time by post-malaria treatment group

Figure 4b. Percentage of participants with sub-microscopic malaria (qPCR) over time in the placebo group (2007 study) by initial anti-malaria treatment

Figure 5. Reticulocyte percentage as an indicator of bone marrow response by treatment group for both years combined.

Figure 6a. Urinary neopterin by post-malaria treatment group

Figure 6b. Urinary neopterin in the placebo group (2007 study) by initial anti-malaria treatment

Figure 1

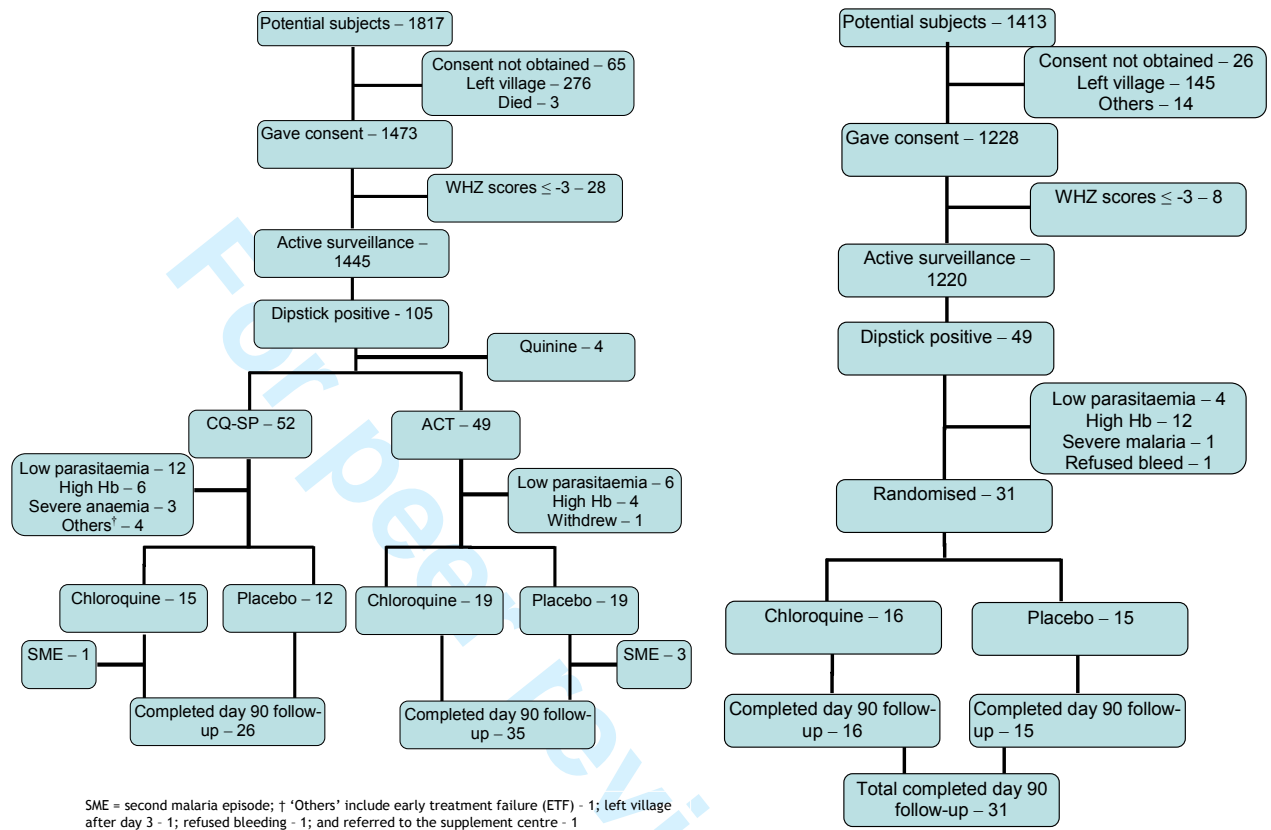

Figure 2 Mean change in haemoglobin concentration at day 30 and day 90 from baseline at day 3 by treatment group for each year of study and for both years combined.

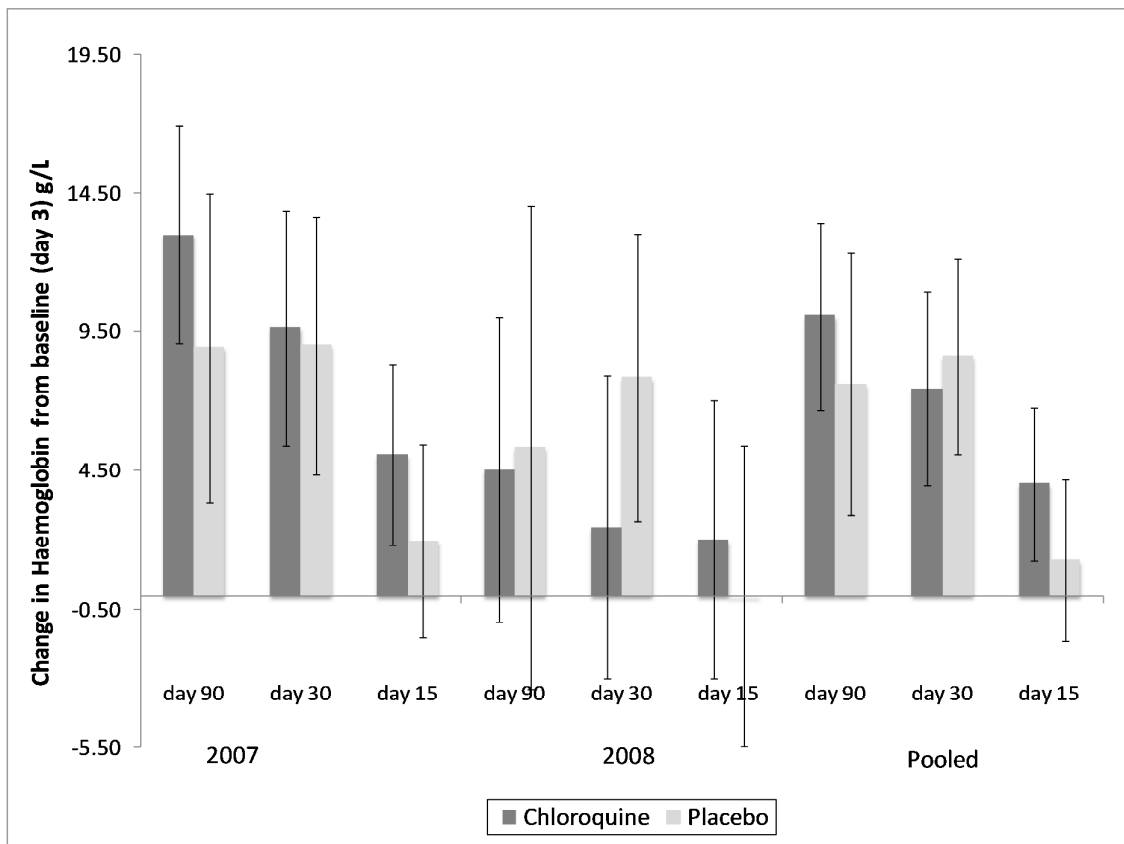

Error bars represent the 95% confidence intervals

Review only

Figure 3 Mean change in hemoglobin in the placebo arm by initial anti-malarial treatment group in 2007 study.

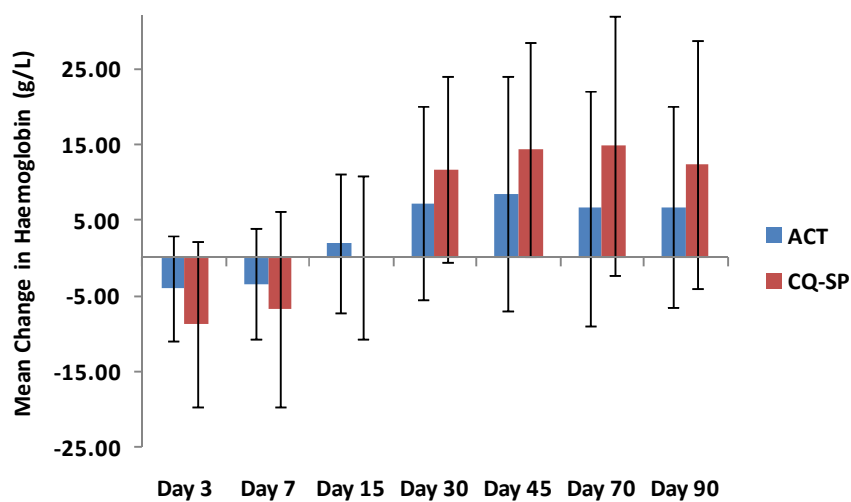

Change in Hemoglobin at day 3 is compared to haemoglobin concentration at presentation with malaria and initiation of anti-malaria treatment. Thereafter the comparison is with baseline levels at day 3 after completion of anti-malarial treatment. Error bars represent the 95% confidence intervals

review only

Figure 4a. Percentage of participants with sub-microscopic malaria (qPCR) over time by post-malaria treatment group

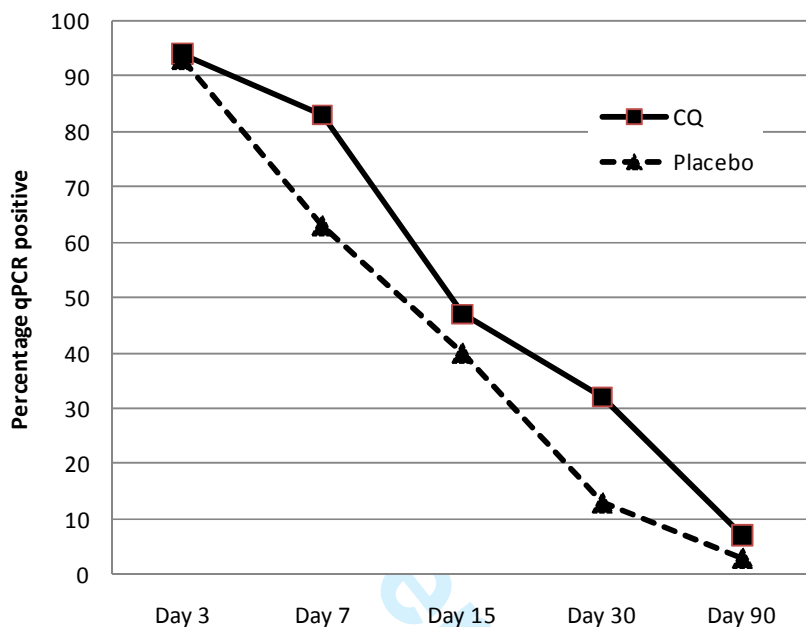

Figure 4b. Percentage of participants with sub-microscopic malaria (qPCR) over time in the placebo group (2007 study) by initial anti-malaria treatment

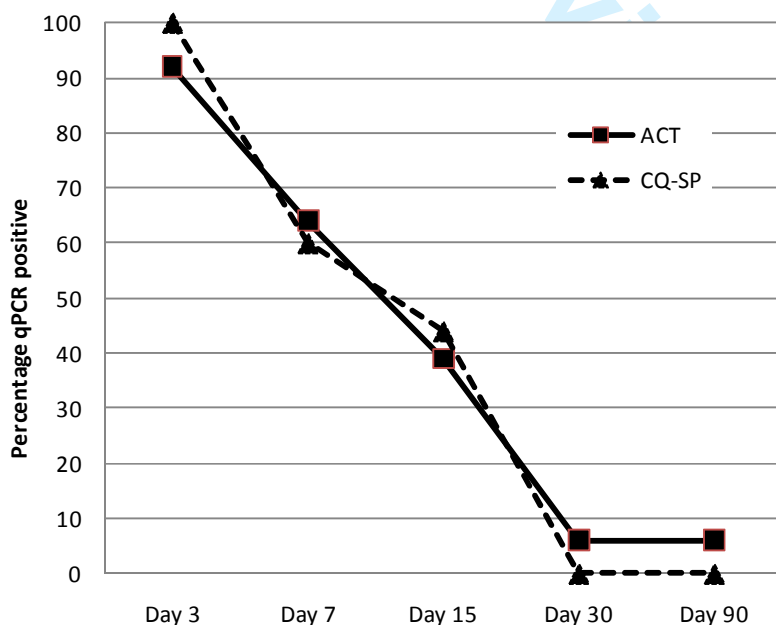

1  
2  
3  
4  
5  
6  
7  
8  
9  
10  
11  
12  
13  
14  
15  
16  
17  
18  
19  
20  
21  
22  
23  
24  
25  
26  
27  
28  
29  
30  
31  
32  
33  
34  
35  
36  
37  
38  
39  
40  
41  
42  
43  
44  
45  
46  
47  
48  
49  
50  
51  
52  
53  
54  
55  
56  
57  
58  
59  
60

Figure 5. Reticulocyte percentage as an indicator of bone marrow response by treatment group for both years combined.

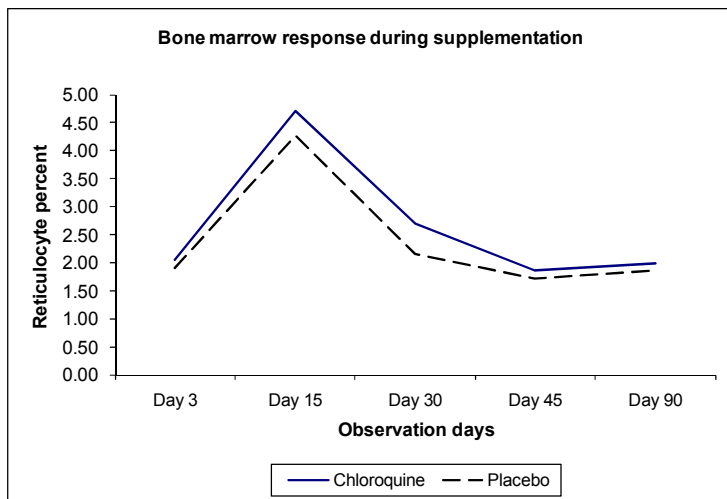

For peer review only

Figure 6a. Urinary neopterin by post-malaria treatment group

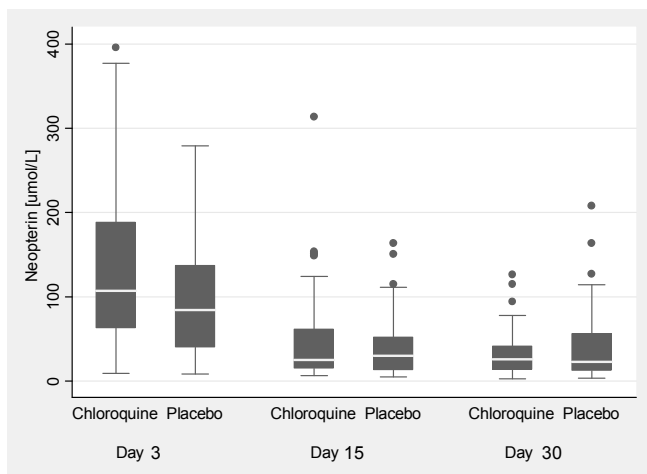

Figure 6b. Urinary neopterin in the placebo group (2007 study) by initial anti-malaria treatment

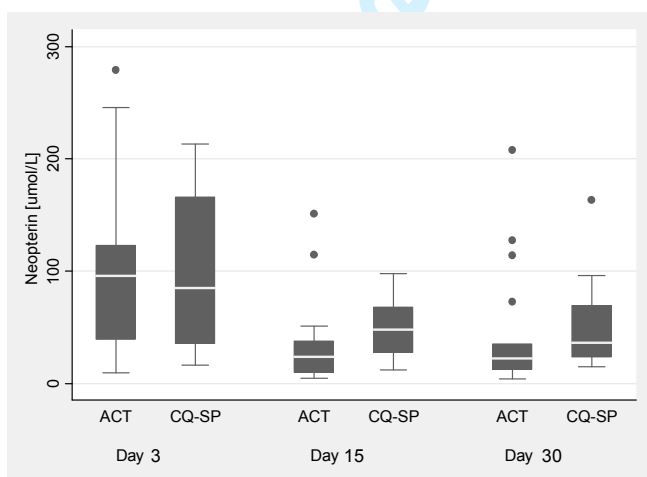

Pre-view only

1  
2  
3  
4  
5  
6  
7  
8  
9  
10  
11  
12  
13  
14  
15  
16  
17  
18  
19  
20  
21  
22  
23  
24  
25  
26  
27  
28  
29  
30  
31  
32  
33  
34  
35  
36  
37  
38  
39  
40  
41  
42  
43  
44  
45  
46  
47  
48  
49  
50  
51  
52  
53  
54  
55  
56  
57  
58  
59  
60

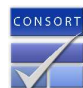

## CONSORT 2010 checklist of information to include when reporting a randomised trial\*

| Section/Topic                    | Item No | Checklist item                                                                                                                                                                              | Reported on page No |
|----------------------------------|---------|---------------------------------------------------------------------------------------------------------------------------------------------------------------------------------------------|---------------------|
| <b>Title and abstract</b>        |         |                                                                                                                                                                                             |                     |
|                                  | 1a      | Identification as a randomised trial in the title                                                                                                                                           | 1                   |
|                                  | 1b      | Structured summary of trial design, methods, results, and conclusions (for specific guidance see CONSORT for abstracts)                                                                     | 2-3                 |
| <b>Introduction</b>              |         |                                                                                                                                                                                             |                     |
| Background and objectives        | 2a      | Scientific background and explanation of rationale                                                                                                                                          | 6-7                 |
|                                  | 2b      | Specific objectives or hypotheses                                                                                                                                                           | 7                   |
| <b>Methods</b>                   |         |                                                                                                                                                                                             |                     |
| Trial design                     | 3a      | Description of trial design (such as parallel, factorial) including allocation ratio                                                                                                        | 8                   |
|                                  | 3b      | Important changes to methods after trial commencement (such as eligibility criteria), with reasons                                                                                          | 8                   |
| Participants                     | 4a      | Eligibility criteria for participants                                                                                                                                                       | 8-9                 |
|                                  | 4b      | Settings and locations where the data were collected                                                                                                                                        | 8                   |
| Interventions                    | 5       | The interventions for each group with sufficient details to allow replication, including how and when they were actually administered                                                       | 10-11 & 9-10        |
| Outcomes                         | 6a      | Completely defined pre-specified primary and secondary outcome measures, including how and when they were assessed                                                                          | 11, 9-10, & 12      |
|                                  | 6b      | Any changes to trial outcomes after the trial commenced, with reasons                                                                                                                       | N/A                 |
| Sample size                      | 7a      | How sample size was determined                                                                                                                                                              | 11-12               |
|                                  | 7b      | When applicable, explanation of any interim analyses and stopping guidelines                                                                                                                | N/A                 |
| <b>Randomisation:</b>            |         |                                                                                                                                                                                             |                     |
| Sequence generation              | 8a      | Method used to generate the random allocation sequence                                                                                                                                      | 10                  |
|                                  | 8b      | Type of randomisation; details of any restriction (such as blocking and block size)                                                                                                         | 10                  |
| Allocation concealment mechanism | 9       | Mechanism used to implement the random allocation sequence (such as sequentially numbered containers), describing any steps taken to conceal the sequence until interventions were assigned | 10                  |
| Implementation                   | 10      | Who generated the random allocation sequence, who enrolled participants, and who assigned participants to interventions                                                                     | 10                  |
| Blinding                         | 11a     | If done, who was blinded after assignment to interventions (for example, participants, care providers, those                                                                                | 10                  |



|                                                      |     |                                                                                                                                                   |                                 |
|------------------------------------------------------|-----|---------------------------------------------------------------------------------------------------------------------------------------------------|---------------------------------|
|                                                      |     | assessing outcomes) and how                                                                                                                       |                                 |
|                                                      | 11b | If relevant, description of the similarity of interventions                                                                                       | 10-11                           |
| Statistical methods                                  | 12a | Statistical methods used to compare groups for primary and secondary outcomes                                                                     | 12-13                           |
|                                                      | 12b | Methods for additional analyses, such as subgroup analyses and adjusted analyses                                                                  | 12-13                           |
| <b>Results</b>                                       |     |                                                                                                                                                   |                                 |
| Participant flow (a diagram is strongly recommended) | 13a | For each group, the numbers of participants who were randomly assigned, received intended treatment, and were analysed for the primary outcome    | 14 & Fig1                       |
|                                                      | 13b | For each group, losses and exclusions after randomisation, together with reasons                                                                  | 14                              |
| Recruitment                                          | 14a | Dates defining the periods of recruitment and follow-up                                                                                           | 8 & 4                           |
|                                                      | 14b | Why the trial ended or was stopped                                                                                                                | N/A                             |
| Baseline data                                        | 15  | A table showing baseline demographic and clinical characteristics for each group                                                                  | 14-15 & Table 3                 |
| Numbers analysed                                     | 16  | For each group, number of participants (denominator) included in each analysis and whether the analysis was by original assigned groups           | 15-18                           |
| Outcomes and estimation                              | 17a | For each primary and secondary outcome, results for each group, and the estimated effect size and its precision (such as 95% confidence interval) | 15-18 Tables 3,4a, 4b, Figs 2-6 |
|                                                      | 17b | For binary outcomes, presentation of both absolute and relative effect sizes is recommended                                                       | N/A                             |
| Ancillary analyses                                   | 18  | Results of any other analyses performed, including subgroup analyses and adjusted analyses, distinguishing pre-specified from exploratory         | N/A                             |
| Harms                                                | 19  | All important harms or unintended effects in each group (for specific guidance see CONSORT for harms)                                             | N/A                             |
| <b>Discussion</b>                                    |     |                                                                                                                                                   |                                 |
| Limitations                                          | 20  | Trial limitations, addressing sources of potential bias, imprecision, and, if relevant, multiplicity of analyses                                  | 2, 19-21                        |
| Generalisability                                     | 21  | Generalisability (external validity, applicability) of the trial findings                                                                         | 19-21                           |
| Interpretation                                       | 22  | Interpretation consistent with results, balancing benefits and harms, and considering other relevant evidence                                     | 19-21                           |
| <b>Other information</b>                             |     |                                                                                                                                                   |                                 |
| Registration                                         | 23  | Registration number and name of trial registry                                                                                                    | 1                               |
| Protocol                                             | 24  | Where the full trial protocol can be accessed, if available                                                                                       | N/A                             |
| Funding                                              | 25  | Sources of funding and other support (such as supply of drugs), role of funders                                                                   | 1                               |

1  
2  
3  
4  
5  
6  
7  
8  
9  
10  
11  
12  
13  
14  
15  
16  
17  
18  
19  
20  
21  
22  
23  
24  
25  
26  
27  
28  
29  
30  
31  
32  
33  
34  
35  
36  
37  
38  
39  
40  
41  
42  
43  
44  
45  
46  
47  
48  
49

\*We strongly recommend reading this statement in conjunction with the CONSORT 2010 Explanation and Elaboration for important clarifications on all the items. If relevant, we also recommend reading CONSORT extensions for cluster randomised trials, non-inferiority and equivalence trials, non-pharmacological treatments, herbal interventions, and pragmatic trials. Additional extensions are forthcoming: for those and for up to date references relevant to this checklist, see [www.consort-statement.org](http://www.consort-statement.org).

For peer review only



**Randomised controlled trial of weekly chloroquine to re-establish normal erythron iron flux and haemoglobin recovery in post-malarial anaemia**

|                                 |                                                                                                                                                                                                                                                                                                                                                                                                                                                                                                                                       |
|---------------------------------|---------------------------------------------------------------------------------------------------------------------------------------------------------------------------------------------------------------------------------------------------------------------------------------------------------------------------------------------------------------------------------------------------------------------------------------------------------------------------------------------------------------------------------------|
| Journal:                        | <i>BMJ Open</i>                                                                                                                                                                                                                                                                                                                                                                                                                                                                                                                       |
| Manuscript ID:                  | bmjopen-2013-002666.R1                                                                                                                                                                                                                                                                                                                                                                                                                                                                                                                |
| Article Type:                   | Research                                                                                                                                                                                                                                                                                                                                                                                                                                                                                                                              |
| Date Submitted by the Author:   | 11-Apr-2013                                                                                                                                                                                                                                                                                                                                                                                                                                                                                                                           |
| Complete List of Authors:       | Cox, Sharon; London School of Hygiene & Tropical Medicine, MRC International Nutrition Group; Muhimbili Wellcome Programme, Nweneka, Chidi; MRC Keneba, Doherty, Conor; Royal Hospital for Sick Children, Fulford, Anthony; London School of Hygiene and Tropical Medicine, MRC International Nutrition Group<br>Moore, Sophie; London School of Hygiene and Tropical Medicine, MRC International Nutrition Group<br>Prentice, Andrew; London School of Hygiene and Tropical Medicine, MRC International Nutrition Group; MRC Keneba, |
| <b>Primary Subject Heading</b>: | Haematology (incl blood transfusion)                                                                                                                                                                                                                                                                                                                                                                                                                                                                                                  |
| Secondary Subject Heading:      | Epidemiology, Nutrition and metabolism, Infectious diseases, Pharmacology and therapeutics                                                                                                                                                                                                                                                                                                                                                                                                                                            |
| Keywords:                       | TROPICAL MEDICINE, Clinical trials < THERAPEUTICS, Anaemia < HAEMATOLOGY                                                                                                                                                                                                                                                                                                                                                                                                                                                              |
|                                 |                                                                                                                                                                                                                                                                                                                                                                                                                                                                                                                                       |

SCHOLARONE™  
Manuscripts

1  
2  
3  
4 **Randomised controlled trial of weekly chloroquine to re-establish normal erythron iron flux and**  
5  
6 **haemoglobin recovery in post-malarial anaemia**  
7  
8

9 Sharon E Cox<sup>1,3\*</sup>, Chidi V Nweneke<sup>1\*</sup>, Conor P Doherty<sup>2</sup>, Anthony J Fulford<sup>1</sup>, Sophie E Moore<sup>1</sup>, Andrew M.  
10 Prentice<sup>1</sup>  
11  
12  
13

14  
15 **Affiliations**

16 Medical Research Council (MRC) International Nutrition Group, London School of Hygiene & Tropical  
17 Medicine, London, UK & MRC Keneba, The Gambia (CVN, SEC, SEM, AMP)  
18 Department of Paediatrics, Royal Hospital for Sick Children, Glasgow, UK (CPD)  
19 Muhimbili Wellcome Programme, Muhimbili University of Health & Allied Sciences, Dar es Salaam,  
20 Tanzania. (SEC)  
21  
22  
23  
24  
25  
26  
27  
28  
29

30 \* Chidi V Nweneke & Sharon E Cox contributed equally to this manuscript.  
31  
32

33 **Correspondence and reprint request to:**

34 Andrew M. Prentice, MRC International Nutrition Group, LSHTM, Keppel Street, London WC1E 7HT, UK.  
35  
36 E-mail: [Andrew.Prentice@lshtm.ac.uk](mailto:Andrew.Prentice@lshtm.ac.uk) Tel: +44-20-7958-8140 Fax: +44-20-7958-8111  
37  
38  
39  
40

41 **Sources of support:** This study was supported by the UK Medical Research Council (MC-A760-5QX00).  
42

43 The funder had no role in the design, analysis or reporting of this trial.  
44  
45  
46  
47

48 **Running head:** Chloroquine in post-malarial anaemia  
49  
50  
51

52 **Abbreviations used:** ACT, co-artemether; CQ-SP, chloroquine plus sulphadoxine-pyrimethamine; Hb,  
53 haemoglobin; MCH, mean cell haemoglobin; MCV, mean cell volume; RCT, randomised controlled trial;  
54  
55 SMA, severe malarial anaemia; ZnPP, zinc protoporphyrin.  
56  
57  
58  
59  
60

1  
2  
3  
4  
5  
6 **Trial registration:** The clinical trial registration number is NCT00473837 (ClinicalTrials.gov).  
7  
8  
9  
10  
11  
12  
13  
14  
15  
16  
17  
18  
19  
20  
21  
22  
23  
24  
25  
26  
27  
28  
29  
30  
31  
32  
33  
34  
35  
36  
37  
38  
39  
40  
41  
42  
43  
44  
45  
46  
47  
48  
49  
50  
51  
52  
53  
54  
55  
56  
57  
58  
59  
60

## Abstract

**Objective:** To determine if low-dose weekly chloroquine (CQ) therapy improves recovery from malaria-associated anaemia.

**Design:** Proof of concept randomised clinical trial.

**Setting:** West Kiang District, Lower River Region, The Gambia

**Participants:** Children resident in participating communities, aged 12-72 months with uncomplicated malaria identified using active case detection over two consecutive malaria transmission seasons.

**Interventions:** In 2007 eligible children were randomised to chloroquine-sulphadoxine/pyrimethamine (CQ-SP) or co-artemether (ACT) anti-malarial therapy, and after parasite clearance on Day 3 subsequently re-randomised (double-blind) to weekly low-dose CQ (5mg/kg) or placebo. In 2008 all eligible children were treated with ACT and subsequently randomised to CQ or placebo.

**Outcome measures:** The primary outcome was change in haemoglobin from baseline (Day 3 of anti-malarial treatment) to Day 90 in the CQ and placebo treatment arms. Secondary outcomes were changes in urinary neopterin as a marker of macrophage activation, markers of erythropoietic response and prevalence of sub-microscopic parasitaemia. Change in haemoglobin in the placebo arm by initial anti-malarial treatment was also assessed.

**Results:** In 2007 101 children with uncomplicated malaria were randomised to anti-malarial treatment with CQ-SP or ACT and 65 subsequently randomised to weekly CQ or placebo. In 2008 all children received ACT anti-malarial treatment and 31 subsequently randomised to weekly CQ or placebo. Follow up to Day 90 was 96%. There was no effect of weekly CQ vs. placebo on change in haemoglobin at Day 90, (CQ: +10.04 g/L [95% CI:6.66/13.42] vs. placebo: +7.61 g/L [95% CI:2.88/12.35]). There was no effect on the secondary outcomes assessed, or effect of initial anti-malarial therapy on haemoglobin recovery. Higher Day 90 haemoglobin independently correlated with older age, not being stunted, higher haemoglobin at Day 0 and adequate iron status at Day 3.

1  
2  
3 **Conclusions:** Weekly low-dose CQ after effective anti-malarial treatment is not effective in  
4  
5 improving recovery from post-malaria anaemia.  
6  
7  
8  
9  
10  
11  
12  
13  
14  
15  
16  
17  
18  
19  
20  
21  
22  
23  
24  
25  
26  
27  
28  
29  
30  
31  
32  
33  
34  
35  
36  
37  
38  
39  
40  
41  
42  
43  
44  
45  
46  
47  
48  
49  
50  
51  
52  
53  
54  
55  
56  
57  
58  
59  
60

For peer review only

## Article Focus

- To determine if 3 months of low-dose weekly chloroquine (CQ) (5mg/kg) therapy after effective treatment of uncomplicated malaria can improve haemoglobin recovery after malaria-associated anaemia in rural African children.
- To test the hypothesis that chloroquine may enhance haematologic recovery after a malaria episode through its anti-inflammatory and immuno-modulatory actions, anti-macrophageal iron loading effect, and anti-malarial effect (despite widespread resistance).

## Key Messages

- Weekly low-dose CQ after effective anti-malarial treatment was not effective in improving recovery from mild to moderate post-malaria anaemia.
- Weekly low dose CQ at 5mg/kg had no clear effects on erythropoietic responses as determined by reticulocyte percentage, or immune-mediated inflammation as assessed by urinary neopterin, a marker of macrophage activation.

## Strengths and limitations

- The strengths of this study are its randomised design and double blinding of the allocation to weekly CQ or placebo and that few subjects were lost to follow-up. The continuous follow-up and active case detection for all children ensured that malaria infections were detected early and within similar time-frames, plus resurgent or new clinical infections were excluded from the analysis of haemoglobin change. A strict malaria case definition was adhered to and the measurement of sub-microscopic parasitaemia over time allowed the effects of incomplete treatment to be modelled.
- A limitation of the study was the need to recruit participants over 2 malaria transmission seasons and the significantly reduced malaria transmission rate in 2008 and thus reduced recruitment which also appeared to affect the severity of malaria in terms of parasite



1  
2  
3 densities at first detection and haemoglobin concentrations. However, the confidence  
4  
5 intervals of the effect size in the final multivariable analysis do not include the clinically  
6  
7 significant effect size included in the sample size calculation and thus our observation is  
8  
9 unlikely to be due to a type II error as a result of lack of power to detect a true effect.

- 10  
11 • It is possible that the relatively low dose of CQ we used was insufficient to mediate the  
12  
13 effects that we were testing for and we were unable to conduct pilot studies of CQ drug  
14  
15 dosage and duration to determine the potential best treatment regime to test or of the  
16  
17 timings of evaluation of possible mechanisms of effect.
- 18  
19 • The change in design in 2008 to all children receiving ACT anti-malarial treatment did not  
20  
21 affect the analysis of the primary outcome. The change did, however, limit our ability to  
22  
23 determine the effect of initial anti-malaria therapy on haemoglobin response in the placebo  
24  
25 group. An effect of anti-malarial treatment CQ on Hb, when in the context of adequate  
26  
27 parasite clearance as was observed, might have been expected to occur in the early period  
28  
29 of recovery.  
30  
31  
32  
33  
34  
35  
36  
37  
38  
39  
40  
41  
42  
43  
44  
45  
46  
47  
48  
49  
50  
51  
52  
53  
54  
55  
56  
57  
58  
59  
60

## Introduction

The precise contribution of malaria to anaemia is difficult to calculate mainly because many anaemia-causing conditions co-exist in children living in malaria-endemic countries.<sup>1</sup> Murphy and Breman<sup>2</sup> estimate the annual incidence of severe malaria anaemia (SMA) to be 1.42 to 5.66 million resulting in between 194,000 to 974,000 deaths in children younger than five years. SMA increases the risk of death in children with malaria<sup>3</sup>, many of whom die shortly after admission before blood transfusion can be commenced<sup>4,5</sup> and after discharge in the community<sup>6</sup>. In addition, blood transfusion, the standard treatment for severe malaria anaemia exposes the child to the risk of transfusion-related infections like Human Immunodeficiency Virus (HIV) and hepatitis<sup>7</sup>. Among a nationally representative sample of children aged one to five years in The Gambia in 1999, 76% had a haemoglobin (Hb) less than 11g/dl and 15% had Hb less than 7g/dl<sup>8</sup>. It is likely that most of the cases of moderate to severe anaemia were due in great part to malaria<sup>9-11</sup>. A better understanding of the pathogenesis of malaria anaemia is required to improve its prevention and management.

Multiple immune and non-immune-mediated mechanisms cause anaemia during and after a malaria episode<sup>12</sup> including the destruction of non-parasitized erythrocytes which may account for more than 90% of erythrocyte loss<sup>13,14</sup>. One important component is inflammation-induced iron delocalisation which is characterised by sequestration of iron by the monocyte-macrophage system and hepatocytes, resulting in a state of pseudo-iron deficiency; a state that reverses after the inflammation has subsided<sup>12</sup>. The trans-membrane protein ferroportin is the exclusive route for cellular iron efflux and is responsible for releasing absorbed iron from enterocytes and sequestered iron from macrophages<sup>12,15,16</sup>. Hepcidin, the master-regulator of iron metabolism which responds both to iron status and inflammation<sup>15</sup>, blocks ferroportin. Clinically, malaria-induced inflammation has been shown to be associated with a hepcidin-mediated reduction in intestinal absorption of iron.<sup>17</sup> Inflammatory cytokines, particularly IL-6 and IL-1 stimulate hepcidin release<sup>18,19</sup> resulting both in reduced iron absorption of dietary iron and impaired macrophageal release of iron; the latter effect being quantitatively much more significant as macrophageal iron recycling and transport to the

1  
2  
3 erythron is 25-30 fold greater than the influx of dietary iron. In this way hepcidin is the mediator of  
4  
5 the anaemia of chronic disease<sup>15</sup>. TNF- $\alpha$  could also play a role in ferroportin-mediated iron transfer  
6  
7 independent of hepcidin<sup>20</sup>. Rapid resolution of malaria-induced inflammation could therefore limit  
8  
9 the degree and duration of malaria anaemia by reducing the duration of iron delocalisation.  
10

11 Chloroquine is a cheap and safe antimalarial with proven anti-inflammatory properties; and  
12  
13 has been shown to reduce iron delocalisation *in vitro*<sup>21 22</sup>. We hypothesised that chloroquine may  
14  
15 enhance haematologic recovery after a malaria episode through its anti-inflammatory and immuno-  
16  
17 modulatory actions, anti-macrophageal iron loading effect, and anti-malarial effect (despite  
18  
19 widespread resistance). We designed a proof of concept study to investigate the potential use of  
20  
21 chloroquine in the management of mild post malaria anaemia.  
22  
23  
24  
25  
26  
27  
28  
29  
30  
31  
32  
33  
34  
35  
36  
37  
38  
39  
40  
41  
42  
43  
44  
45  
46  
47  
48  
49  
50  
51  
52  
53  
54  
55  
56  
57  
58  
59  
60

## Materials and Methods

### Study Design and population

This study was a population-based randomised, controlled trial (RCT) in children aged 12 to 72 months conducted over two malaria seasons in 2007 and 2008 in West Kiang District, Lower River Region, The Gambia. The study was initially designed and conducted as a 2x2 randomised placebo-controlled trial in 2007 but had to be changed, due to changes in national malaria treatment guidelines, to a two-arm RCT during the 2<sup>nd</sup> malaria transmission season in 2008. In the 2x2 phase of the study, children with malaria were initially openly randomised to receive a therapeutic dose regime of chloroquine plus sulphadoxine-pyrimethamine (CQ-SP) or co-artemether (ACT) (Day 0). After treatment, on Day 3, children were subsequently randomised (double blind) to weekly chloroquine or placebo until Day 90 (**Figure 1**). In the two-arm phase, all enrolled children with malaria were treated with ACT and then randomised and followed up as before (**Figure 1**). A combination of active and passive case detection was used to identify children in participating communities with malaria using a standard case definition of clinical malaria (see below).

The climate of this district is typical of sub-Saharan Africa with a long dry season lasting from November to June and a relatively short rainy season lasting from July to October. Malaria transmission is seasonal, hyperendemic and follows the rainy season, occurring between July and December. The prevalence of children experiencing one or more malaria episodes among a cohort of 1002 children aged between 1-6 years under active malaria surveillance during a population-based study in 2003 was 34% (Doherty et al. Unpublished data). During the study period standard malaria control activities in the district consisted of insecticide treated bednet distribution and case finding and treatment. In 2008 the standard first-line antimalarial treatment regimen for uncomplicated malaria in The Gambia was changed from CQ-SP to co-artemether.

### *Inclusion & exclusion criteria*

Eligibility for malaria surveillance and subsequent possible enrolment into the RCT included all children in the participating communities, aged between 12 and 72 months at the start of the

1  
2  
3 surveillance period and who were not severely wasted, defined as weight-for-height Z scores less  
4  
5 than -3SD.  
6

7  
8 Inclusion criteria for enrolment included: 1) uncomplicated malaria at Day 0, defined as a  
9  
10 history of fever 48 hours prior to presentation or a measured temperature of 37.5°C or more with  
11  
12 peripheral parasitaemia (asexual forms of *P. falciparum*  $\geq 500/\mu\text{L}$  by microscopy) on Day 0 of the  
13  
14 study; and 2) for randomisation to the post-malaria intervention, children had to have a Hb between  
15  
16 69g/L - 110g/L on Day 3 with no peripheral parasitaemia.  
17

18  
19 Children were excluded from the RCT if they were: 1) unable to take oral medications; 2) had  
20  
21 features of severe malaria;<sup>1</sup> 3) had a known haemoglobinopathy; 4) were enrolled in another  
22  
23 project; 5) had already received antimalarial drugs from other sources outside the project team; or  
24  
25 6) were prescribed other drugs with potential antimalarial or anti-anaemic effects such as co-  
26  
27 trimoxazole and haematinics.  
28

29  
30 Following randomisation to weekly CQ or placebo children were withdrawn from the study  
31  
32 if: 1) they developed a second malaria episode or had life-threatening symptoms, more severe  
33  
34 disease or serious adverse reactions; 2) left the study area for more than 14 days; 3) received  
35  
36 antimalarials from other sources; or 4) Hb fell below 70g/L.  
37

### 38 ***Field and clinical procedures***

39  
40 To effect the surveillance protocol, the study villages were divided into geographically  
41  
42 adjacent clusters supervised by a resident study nurse who visited each village morning and evening  
43  
44 and provided 24-hour clinical coverage to all enrolled children in their cluster. The active surveillance  
45  
46 consisted of twice weekly temperature monitoring of enrolled children by village assistants; while  
47  
48 the passive surveillance consisted of mothers referring sick children to the visiting study nurse.  
49  
50 Children with fever – reported or measured – were screened for malaria using a rapid diagnostic test  
51  
52 (MRDT) (Cortez diagnostics, INC, USA) after clinical evaluation. Children testing negative to the  
53  
54 MRDT were treated based on the likely diagnosis from the symptoms and signs. Children testing  
55  
56 positive to the MRDT were commenced on antimalarials immediately (either CQ-SP or ACT in 2007,  
57  
58  
59  
60

1  
2  
3 and ACT in 2008 for three days) and directly observed by the study nurse and managed as  
4 appropriate. Finger prick blood samples (days 7, 15, 30 & 70) were collected in an EDTA microtainer  
5 while venous blood (2mls – days 0 & 90; and 5mls – days 3 & 45) samples were collected in an EDTA  
6 vacutainer and sent to the study laboratory on the same day. Co-morbidities were treated as  
7 appropriate, avoiding co-trimoxazole and haematinics. For the subsequent visits after initial malaria  
8 diagnosis at Day 0, children were seen by the study nurse and blood samples and clinical data  
9 collected as per protocol. Only children who fulfilled the inclusion criteria for advancement to the  
10 weekly chloroquine/weekly placebo phase of the study were sampled after Day 3. These children  
11 were also followed up on days 15, 30, 45, 70 (except in 2008) and 90.

### 22 ***Randomisation and blinding***

23  
24  
25 The randomisation to malaria treatment group in 2007 (CQ-SP or ACT) was open (non-  
26 blinded to trial staff, investigators or participants) and was done by sequential assignment as  
27 children were identified. The block randomisation to the post-malaria treatment of weekly CQ or  
28 placebo in both 2007 and 2008 was double blinded and was carried out in blocks of eight. The  
29 randomisation codes were generated by a staff member independent of the study team and held by  
30 the external trial monitor. Treatment codes were labelled A to H and placed in sequentially  
31 numbered, opaque sealed envelopes held by the study nurses. Allocation to the treatment was by  
32 matching the code in the envelope to a bottle of the intervention labelled with the same code and  
33 then labelled with the subject ID.

### 44 ***Interventions***

45  
46 For children openly randomised to malaria treatment at Day 0 with CQ-SP, children received  
47 chloroquine syrup (Chlormal<sup>®</sup>, Medreich Sterilab Ltd, Avalahalli, Bangalore, India) consisting of 50mg  
48 chloroquine base per 5mls as chloroquine phosphate at a dose of 10mg/kg for 3 days (days 0-2). SP  
49 (Micro Laboratories, India) was co-administered as a 525 mg tablet (500mg sulfadoxine and 25mg  
50 pyrimethamine) on Day 0 only at a dose of ½ tablet/10kg. Children who were randomised to ACT  
51 treatment in 2007 and all children in 2008 received co-artemether (Coartem<sup>®</sup>) tablets (Beijing  
52  
53  
54  
55  
56  
57  
58  
59  
60

1  
2  
3 Novartis Pharma Ltd, Beijing China for Novartis Pharma AG, Basle, Switzerland) as blister packets of 6  
4  
5 tablets per card with each tablet containing 20mg artemether and 120mg lumefantrine. The  
6  
7 treatment dose comprised a stat dose on Day 0 and then 8 hours later, followed by twice daily doses  
8  
9 for the next two days with doses depending on body weight (5 - <15 kg – one tablet/dose; 15 - <25kg  
10  
11 – 2 tablets/dose; 25 - <35kg – 3 tablets per dose).

12  
13  
14 During the second blinded phase of the trial children received either weekly CQ syrup (as  
15  
16 above) but at a dose of 5mg/kg or matching placebo syrup (prepared by Royal Victoria Teaching  
17  
18 Hospital pharmaceutical laboratory in collaboration with Atlantic Pharmaceuticals Limited,  
19  
20 Latrikunda Sabiji, The Gambia) The syrups were in similar amber coloured bottles with matching caps  
21  
22 and labels. Doses were administered in the child's home under direct observation by the study  
23  
24 nurses who waited for at least 10 minutes after administering the drugs to ensure that they were  
25  
26 not vomited.  
27  
28

### 29 30 **Primary and secondary outcomes**

31  
32 The primary outcome measure was Hb change from Day 3 post treatment of malaria episode  
33  
34 to Day 90 in the weekly CQ and placebo arms.  
35

36  
37 The secondary outcomes were to compare between the weekly CQ and placebo arms: (1-i)  
38  
39 changes in erythropoietic response between Day 3 and Day 30; and (1-ii) between day 3 and day 90;  
40  
41 (2) changes in urinary neopterin from Day 3 to Day 30 as a marker of macrophage activation; (3)  
42  
43 prevalence of sub-microscopic malaria parasitaemia using PCR at each time point, and; (4) Hb  
44  
45 change from Day 3 to Day 90 in the two placebo arms to investigate the effects of initial malaria  
46  
47 treatment therapy.  
48

### 49 50 **Sample size**

51  
52 During initial study design we used a working assumption of a standard deviation (SD) for  
53  
54 change in Hb of 15 g/l<sup>23</sup>. With power 80% and significance level set at 5% we estimated the sample  
55  
56 sizes required to detect varying effect sizes for the primary outcome. A sample size of 65 per arm  
57  
58  
59  
60

1  
2  
3 was estimated to be able to detect an effect size of 7.5g/l. This sample size was thought to be  
4  
5 achievable and the effect size of likely public health significance.  
6

7  
8 **Laboratory procedures:**

9  
10 Table 1 describes the different laboratory analysis conducted. Zinc protoporphyrin (ZnPP) as  
11  
12 a marker of iron status was measured on fresh whole blood using a fluorometer (AVIV Biomedicals,  
13  
14 Lakewood, NJ, USA). Full blood count (FBC), haemoglobin and automated reticulocyte count were  
15  
16 performed using a Cell Dye 3700 (Abbott Laboratories. Abbott Park, Illinois, USA). Iron deficiency  
17  
18 was defined using 3 parameters; mean cell volume (MCV), mean cell haemoglobin (MCH) and ZnPP.  
19  
20 The cut off values for the different parameters employed were:  $\geq 61 \mu\text{mol/mol}$  of Hb for ZnPP<sup>24</sup>,  $\leq 73 \text{fl}$   
21  
22 for MCV<sup>25</sup> and  $\leq 25 \text{pg}$  for MCH<sup>25</sup>. Combining these parameters has been shown to increase their  
23  
24 sensitivity and specificity to identify iron deficiency<sup>26</sup>. Malaria parasites were identified in a thick  
25  
26 peripheral blood smear stained with Giemsa overnight and read by light microscope with x100  
27  
28 magnification in oil immersion. Parasite DNA extraction and subsequent quantitative PCR  
29  
30 amplification were carried out using established protocols<sup>27</sup>. In brief, DNA extraction was done using  
31  
32 the Qlamp DNA Mini Kit (Qiagen<sup>TM</sup> Ltd. UK) according to the manufacturer's instructions with minor  
33  
34 modifications. Extracted DNA samples were stored at  $-20^\circ\text{C}$ . Quantification of parasite density was  
35  
36 done with a TaqMan assay employing a fluorogenic probe to detect specific parasite products and  
37  
38 using an Opticon<sup>®</sup> 2 Real Time PCR machine and Opticon<sup>TM</sup> version 3.1 software (Bio-Rad  
39  
40 Laboratories, Inc., USA). Primers and probes were synthesized by Applied Biosystems, UK. Urinary  
41  
42 neopterin levels were measured using an ELISA technique (BRAHMS Neopterin EIA, B.R.A.H.M.S,  
43  
44 Germany). The stored urine was allowed to thaw at room temperature and then diluted 1:100 and  
45  
46 the rest of the procedure was according to the manufacturer's instructions.  
47  
48  
49

50  
51 **Statistical analysis:**

52  
53 Delta haemoglobin summary statistics are presented as means and standard deviations (SD)  
54  
55 for normally distributed continuous variables, and counts and percentages for discrete variables.  
56  
57 Neopterin and parasite count were not normally distributed and were log transformed ( $\log_e$  for  
58  
59  
60



1  
2  
3 neopterin and  $\log_{10}$  for parasite count). The geometric means and 95% confidence intervals are  
4  
5 presented for log-transformed variables. Two-sided student's t tests were used to compare results  
6  
7 between two treatment arms.  
8

9  
10 Visual inspection of Hb change between baseline at Day 3 and later time points by treatment  
11  
12 arm suggested that by Day 30, Hb change in both treatment arms had reached a plateau. To fully  
13  
14 determine the effect of treatment group on Hb change we used random effects models using the  
15  
16 repeat measures at day 30 and day 90. Initial malaria treatment group (CQ-SP vs ACT), Hb at  
17  
18 recruitment (Day 0 Hb), baseline Hb (Day 3), age in months, year of study, and the child's village  
19  
20 were included in models "*a priori*" and hence adjusted for.  
21

22  
23 Linear regression was used to investigate further potential predictors of Hb change in the  
24  
25 study population. First, simple linear regression was used to assess the association of each predictor  
26  
27 variable with Hb. Thereafter, all variables with a P-value of 0.1 or less were included in a multiple  
28  
29 linear regression to assess confounding. The final regression model consisted of only the variables  
30  
31 that maintained a significant association with Hb in the multiple regression models. All analyses  
32  
33 were carried out using STATA version 8 (StataCorp, College Station, TX, USA).  
34

### 35 36 **Ethical clearance**

37  
38 The Scientific Coordinating Committee of the Medical Research Council (UK), The Gambia,  
39  
40 and the MRC/Gambia Government Joint Ethical Committee approved the study (SCC 1076). Written  
41  
42 informed consent was obtained from parents/guardians of the children prior to enrolment. The  
43  
44 clinical trial registration number is NCT00473837 (ClinicalTrials.gov).  
45  
46  
47  
48  
49  
50  
51  
52  
53  
54  
55  
56  
57  
58  
59  
60

## Results

### Characteristics of the study population under malaria surveillance

**Figure 1** describes the flow of participants and reasons for exclusions in the study. In 2007, 1445 of 1817 (80%) potentially eligible children identified through the Keneba MRC DSS database from 14 villages were included in the malaria surveillance. In 2008, 1220 of the 1413 (86%) identified children from 5 of the original villages were included in the malaria surveillance (smaller villages were excluded as they had contributed few cases in 2007). **Table 2** describes the characteristics of the children placed under surveillance for malaria. The proportion of children with a positive malaria rapid test during surveillance (only first event per child counted) fell from 7.3% (105/1445) in 2007 to 4% (49/1220) in 2008. In the first year of the study, 101 (96%) of the children with a positive malaria rapid test were randomised to CQ-SP or ACT treatment, and 65 (64%) subsequently randomised at Day 3 to weekly chloroquine or placebo, with all children completing follow up until Day 30 and 33/34 completing follow-up until Day 90 in the weekly CQ and 28/31 in the weekly placebo group. In the second year of the study 31 of the 49 (63%) cases with a first positive malaria rapid test were subsequently randomised to weekly CQ or placebo after treatment with ACT, all of whom completed follow up until Day 90 (16 CQ & 15 placebo).. Thus 96 children were included in the analysis of the primary and secondary outcomes, except for the analysis of effect of initial malaria treatment within the placebo arms which included 31 children.

**Table 3** describes the characteristics of participants randomised to weekly chloroquine and weekly placebo for both years combined. Demographic and anthropometric characteristics were similar between the groups as was baseline Hb at Day 3. The prevalence of iron deficiency measured at baseline was 43.1% (28/65) in 2007 and 58.1% (18/31) in 2008 with a similar prevalence between the CQ/placebo groups within each year (data not shown) and in both years combined. However parasite density was lower in the placebo group (**Table 3**). No adverse events were reported in either treatment group.

### Effect of weekly CQ on haemoglobin change during follow-up

1  
2  
3 To assess the effect of weekly chloroquine on Hb recovery after clearance of peripheral  
4 parasitaemia, we compared change in Hb from Day 3 to Day 90 and Day 3 to Day 30 in the two arms.  
5  
6 No significant differences in Hb change between the two groups were observed, either for the data  
7  
8 for both study years or for each study year separately (both years combined: change in Hb at Day 90,  
9  
10 CQ: +10.04 g/L [95% CI:6.66, 13.42] vs. placebo: +7.61 g/L [95% CI:2.88, 12.35]) (**Figure 2**). Thus the  
11  
12 effect size of the CQ treatment was 2.43 g/L [95% CI -3.38, 8.24] compared to the 7.5g/L we included  
13  
14 in the sample size calculation. However, at Day 15, children receiving weekly CQ had an increase of  
15  
16 3.5 g/L (95% CI: 0.5, 6.4) compared to 0.8g/L (95% CI: -2.3, 3.9) in children in the placebo arm, but  
17  
18 this difference did not reach statistical significance (p=0.2). The lack of effect of weekly CQ remained  
19  
20 when adjusting for factors determined 'a priori' (Hb at recruitment (Day 0), Hb at baseline (Day 3),  
21  
22 age (in months), year of study, initial treatment received (CQ-SP vs ACT), and village group) using a  
23  
24 random effects repeated measures model including Hb measured at day 30 and day 90 (coefficient  
25  
26 =1.43 [95% CI: -1.70, 4.57]). Furthermore, adding parasite density at recruitment, presence of sub-  
27  
28 microscopic parasitaemia at any time point during follow-up, and presence of iron deficiency had no  
29  
30 effect on the estimates of effect for CQ vs. placebo treatment during follow-up (data not shown).  
31  
32  
33  
34  
35

### 36 **Predictors of haemoglobin at Day 90**

37  
38 In the absence of an effect of weekly CQ on Hb change after successful malaria treatment,  
39  
40 we assessed what other factors might determine final Hb. Using simple linear regression significant  
41  
42 positive associations were observed for parasite density at Day 0, better nutritional status, age, Hb  
43  
44 at Day 0 at malaria diagnosis and Day 3 of successful treatment. Presence of iron deficiency at  
45  
46 baseline was associated with significantly lower final Hb. There was no apparent effect of initial  
47  
48 malaria treatment (CQ-SP vs. ACT) (**Table 4a**). In a final multiple regression model, Hb at Day 0 was  
49  
50 the strongest predictor of final Hb and other independent predictors of final haemoglobin were  
51  
52 presence of iron deficiency at Day 3, degree of stunting (height-for-age Z score), and age (in  
53  
54 months). Children with higher Hb at diagnosis and older children had greater final Hb. Children with  
55  
56 iron deficiency at Day 3 had significantly lower final Hb with a mean difference of 12.1g/L (**Table 4b**).  
57  
58  
59  
60

### Effect of initial anti-malaria treatment (CQ-SP vs ACT) on haemoglobin change

A secondary outcome of this study was Hb change from Day 3 to Day 30 and Day 90 in the placebo arm to determine whether initial anti-malaria treatment (CQ-SP or ACT) treatment affected macrophage iron loading in acute clinical malaria and its subsequent release. As indicated in the analysis of Hb at Day 90 there was no significant effect of initial anti-malarial treatment. Please see Supplementary **Figure 2** depicting Hb change during follow up from Day 0 to Day 90 in the placebo arm by initial antimalarial treatment received and the accompanying text.

### Sub-microscopic parasitaemia, inflammation, bone marrow response, haemoglobin change and treatment groups

Sub-microscopic parasitaemia was commonest in the first seven days of acute phase follow up (days 3-15). By Day 30, most were negative (77%). The prevalence of sub-microscopic parasitaemia at days 30 and 90 combined was 15.1% and there was no evidence of an effect of post-malaria treatment group or of initial anti-malarial treatment (**Figure 3 & Supplementary Figure 2**). Most of the sub-microscopic parasitaemia at these time points was of a very low level (one to two parasites per microliter). However, higher parasite density at diagnosis was associated with an increased likelihood of subsequent sub-microscopic parasitaemia at day 30 or 90 with a one log increase in parasite count increasing the odds of having sub-microscopic parasitaemia by 1.6 ( $P=0.005$ ). Although the presence/absence of sub-microscopic parasitaemia during follow up (days 30 & 90) was not associated with final Hb (**Table 4**), in children with high qPCR (quantitative PCR parasite count) parasite count ( $> 500/\mu\text{L}$ ,  $N=3$ ) at Day 30, Hb at Day 30 was significantly lower compared to children with one to two parasites/ $\mu\text{L}$  or none at Day 30 (82.3g/L vs 102.8g/L;  $p = 0.01$ ). Similarly, the mean Hb change was also reduced in those with persistent high parasitaemia at Day 30 (-5.0g/L vs. 8.5g/L; mean Hb difference (95%CI): 13.5g/L (-0.3, 27.3);  $p = 0.06$ ). Bone marrow response as assessed by percentage of reticulocytes peaked at Day 15 (4.5% in both treatment groups combined), compared to similar levels of around 2% at all other measured time points (Days 3, 7, 15 & 90). There was no evidence of an effect of either post-malaria treatment group (**Figure 4**)

1  
2  
3 or of initial anti-malarial therapy (data not shown) on bone marrow response. Urinary neopterin, a  
4 product of activated macrophages and therefore a marker of a pro-inflammatory immune status,  
5  
6  
7 was strongly associated with qPCR parasite count at Day 30 (regression coefficient: 0.2 (95%CI: 0.08,  
8 0.33),  $p = 0.003$ ; adjusted  $R^2 = 0.4091$ ) and was also associated with Hb at Day 30. There was no  
9  
10  
11 evidence of an effect of post-malaria treatment group (**Figure 5**) or of initial anti-malarial treatment  
12  
13  
14 on neopterin concentrations (**Figure S3**).  
15  
16  
17  
18  
19  
20  
21  
22  
23  
24  
25  
26  
27  
28  
29  
30  
31  
32  
33  
34  
35  
36  
37  
38  
39  
40  
41  
42  
43  
44  
45  
46  
47  
48  
49  
50  
51  
52  
53  
54  
55  
56  
57  
58  
59  
60

## Discussion

Chloroquine is used in the treatment of several diseases in addition to its antimalarial use<sup>28</sup>  
<sup>29</sup>. However, we believe this to be the first study to assess its potential role in the management of  
post-malaria anaemia. We hypothesised that since malarial anaemia is essentially a systemic  
inflammatory response to infection<sup>12</sup>, chloroquine, by suppressing plasmodium-induced  
inflammation, could enhance erythropoietic recovery. We tested this hypothesis by comparing two  
groups of children – one group receiving weekly chloroquine and the other group weekly placebo  
after complete clearance of peripheral parasitaemia as determined by microscopy. The primary  
outcome measure was the recovery in Hb at Days 30 and 90 compared to Day 3 Hb levels. Our  
results showed no significant difference in the Hb change between the two groups. The data was  
interrogated further by a random effects model modelling data at Day 30 and Day 90  
simultaneously whilst adjusting for Hb at Day 3 and taking into account random measurement errors  
and missing data. This confirmed that weekly chloroquine at 5mg/kg body weight did not improve  
Hb recovery after uncomplicated clinical malaria. There was a suggestion that weekly CQ may have  
increased the rate of recovery in Hb change at Day 15 accompanied by non-significantly increased  
reticulocyte percentage.

A limitation of the study was the need to recruit participants over 2 malaria transmission  
seasons. In 2008 there was a reduced malaria transmission rate and thus fewer cases available for  
recruitment and also an apparent effect on the severity of malaria in terms of parasite densities at  
first detection and effect on haemoglobin concentrations, with a significantly higher baseline Hb in  
2008. However, the change in design that was necessitated in 2008 did not change the primary  
outcome analysis. Furthermore, the confidence intervals of the observed effect size in the final  
multivariable analysis do not include the effect size included in the sample size calculation and thus  
our observation is unlikely to be due to a type II error as a result of lack of power to detect a true  
effect of this magnitude.

1  
2  
3  
4  
5  
6  
7  
8  
9  
10  
11  
12  
13  
14  
15  
16  
17  
18  
19  
20  
21  
22  
23  
24  
25  
26  
27  
28  
29  
30  
31  
32  
33  
34  
35  
36  
37  
38  
39  
40  
41  
42  
43  
44  
45  
46  
47  
48  
49  
50  
51  
52  
53  
54  
55  
56  
57  
58  
59  
60

The change in design in 2008 to all children receiving ACT anti-malarial treatment did not affect the analysis of the primary outcome. The change did, however, limit our ability to determine the effect of initial anti-malaria therapy on haemoglobin response in the placebo group. An effect of anti-malarial treatment CQ on Hb, when in the context of adequate parasite clearance as was observed, might have been expected to occur in the early period of recovery.

The recommended anti-inflammatory dose of CQ is 3-4mg/kg/day. However, due to lack of safety data for this condition and considering potential adverse effects, particularly retinal damage, we used the lower prophylactic dose of 5mg/kg/week. Using this low dose might have contributed to our inability to detect an effect of CQ. Drenou et al<sup>30</sup> reported the successful control of sideroblastic anaemia (a condition of reduced incorporation of iron into haem in the presence of sufficient or high iron) was for six years on 100mg daily chloroquine without need for blood transfusion.

We had hypothesized that chloroquine will impede macrophageal iron sequestration during the acute clinical episode and improve iron availability for the process of erythropoiesis. Urinary excretion of neopterin is markedly increased in individuals infected with malaria, and corresponds to concurrent activation of T cells and macrophages<sup>31-33</sup>. We measured the urinary neopterin at Days 3, 15 and 30 and expected to see a more rapid decline in neopterin level in the weekly chloroquine group than in the weekly placebo group; but no difference between the treatment groups was observed. It is possible that a difference may have occurred at an intermediate time point between Day 3 and Day 15, when levels had already almost normalised. Indeed, Brown et al<sup>33</sup> showed that in a group of volunteers experimentally infected with *plasmodium* parasites, the timing of maximum neopterin excretion coincided with the treatment and elimination of parasitaemia. In our study, this would coincide with study Days 0 to 3. In future, it might be more informative to carry out more measurements during the first week of malaria diagnosis.

The participants were followed up for 90 days because reports had suggested that Hb continues to fall even after successful malaria treatment primarily due to continuing inflammation<sup>34</sup>

1  
2  
3  
4  
5  
6  
7  
8  
9  
10  
11  
12  
13  
14  
15  
16  
17  
18  
19  
20  
21  
22  
23  
24  
25  
26  
27  
28  
29  
30  
31  
32  
33  
34  
35  
36  
37  
38  
39  
40  
41  
42  
43  
44  
45  
46  
47  
48  
49  
50  
51  
52  
53  
54  
55  
56  
57  
58  
59  
60

<sup>35</sup>. In this study we found no evidence of persistent inflammation, except in the few cases with remaining parasitaemia at Day 30, who also had decreased absolute Hb and Hb change at Day 30 compared with children with no parasitaemia or parasite counts of 1-2/microlitre.

Our observation that children with higher Hb at diagnosis had greater Hb recovery is potentially paradoxical as one would have expected the reverse through statistical regression to the mean and greater 'catch up' in children with lower starting Hb at Day 3. However, as the majority of iron used for Hb recovery is recycled<sup>24</sup>, those with higher Hb at Day 0 have more iron available for recovery. Our non-provision of exogenous iron during the study may have restricted the ability of the more anaemic children to respond appropriately as suggested by our observation of reduced Hb recovery in children with apparent iron deficiency at Day 0. An earlier study in Gambian children showed improved haematological recovery in children treated for malaria and co-supplemented with iron compared to placebo<sup>36</sup>. However, we have also shown in Gambian children reduced iron absorption from supplementation in post-malarial anaemia, whilst also experiencing greater Hb recovery compared to supplemented children with iron-deficiency anaemia. Thus causing us to question the efficacy of iron supplementation given within 2 weeks of anti-malarial treatment<sup>24</sup>. Without the inclusion of a further randomised treatment arm of post-malarial treatment iron supplementation it is not possible to make further recommendations concerning the recent argument for the provision of iron supplementation to children in malaria endemic areas with regular malaria surveillance and treatment facilities<sup>37</sup>.

Our finding that stunted children recovered Hb poorly is consistent with an earlier report of stunting being a determinant of the severity of malaria-associated anaemia<sup>38</sup>. In our population this effect was independent of iron status.

Age has been shown to be strongly associated with risk of severe anaemia in children with acute malaria; the risk decreasing with increasing age<sup>39</sup>. In addition, we have shown in this study that older children recover better from anaemia after an acute malaria episode than younger children.



1  
2  
3 Paying special attention to younger children with malaria anaemia could reduce malaria related  
4 mortality in children.  
5  
6

7  
8 In conclusion, weekly chloroquine administered for three months to children with mild  
9 malaria anaemia at a dose of 5mg/kg/week resulted in no improvement in erythropoietic recovery  
10 compared to placebo. Older children, children with higher initial Hb, less stunting at diagnosis, and  
11 without iron deficiency had better Hb recovery post-malaria. Similar to other reports in the  
12 literature, urinary neopterin was elevated during acute malaria. The role of iron deficiency in  
13 erythropoietic recovery post malaria noted in this study suggests areas for further detailed  
14 investigation of the clinical value in administering both antimalarial and iron supplementation to  
15 children with malaria anaemia residing in areas of high iron deficiency and malaria burden.  
16  
17  
18  
19  
20  
21  
22  
23  
24  
25  
26  
27  
28  
29  
30  
31  
32  
33  
34  
35  
36  
37  
38  
39  
40  
41  
42  
43  
44  
45  
46  
47  
48  
49  
50  
51  
52  
53  
54  
55  
56  
57  
58  
59  
60

### Acknowledgements

The authors wish to acknowledge the contribution of all the members of the field team – Kabiru Ceesay, Edrisa Sinjanka, Lamin Ceesay, Lamin Sowe, Kalilu Sanneh, Bakary Sarr, Muhammed Sidibeh, Yahya Sanyang, the data staff especially Jahid Hassan and Musa Jarjou, the laboratory staff especially Musa Colley, Karamo Camara, Mustapha Bittaye, and Ebrimah Danso, all the drivers of the MRC Keneba, Ms Cheryl Eniyou O, Mrs Fatou Noho, Ms Jankey Jagne, all the village assistants, and the study subjects and their parents.

### Authorship contributions

CVN, CPD and AMP conceived the study with input from SEC. CVN led all practical aspects of the work with logistic and funding support from SEM and AMP. CVN, SEC and AJF were responsible for the statistical analysis and interpretation. CVN and SEC drafted the paper with input and approval from all authors.

### Disclosure of Conflicts of Interest

The authors have no conflict of interest.

### Data sharing

The original dataset is available on request to the corresponding author and permission is dependent on the nature and purpose of intended use.

### Funding

UK Medical Research Council

## References

1. Severe falciparum malaria. World Health Organization, Communicable Diseases Cluster. *Trans R Soc Trop Med Hyg* 2000;94 Suppl 1:S1-90.
2. Murphy SC, Breman JG. Gaps in the childhood malaria burden in Africa: cerebral malaria, neurological sequelae, anemia, respiratory distress, hypoglycemia, and complications of pregnancy. *Am J Trop Med Hyg* 2001;64(1-2 Suppl):57-67.
3. Brabin BJ, Premji Z, Verhoeff F. An analysis of anemia and child mortality. *J Nutr* 2001;131(2S-2):636S-45S; discussion 46S-48S.
4. Bojang KA, Palmer A, Boele van Hensbroek M, et al. Management of severe malarial anaemia in Gambian children. *Trans R Soc Trop Med Hyg* 1997;91(5):557-61.
5. Mulenga M, Malunga F, Bennett S, et al. A randomised, double-blind, placebo-controlled trial of atovaquone-proguanil vs. sulphadoxine-pyrimethamine in the treatment of malarial anaemia in Zambian children. *Trop Med Int Health* 2006;11(11):1643-52.
6. Phiri KS, Calis JC, Faragher B, et al. Long term outcome of severe anaemia in Malawian children. *PLoS ONE* 2008;3(8):e2903.
7. Lackritz EM. Prevention of HIV transmission by blood transfusion in the developing world: achievements and continuing challenges. *Aids* 1998;12 Suppl A:S81-6.
8. NaNA. Nationwide survey on the prevalence of Vitamin A and Iron deficiency in women and children in The Gambia. National Nutrition Survey. Banjul: National Nutrition Agency/Medical Research Council, 2001.
9. Abdalla SH. Iron and folate status in Gambian children with malaria. *Ann Trop Paediatr* 1990;10(3):265-72.
10. Bojang KA, Van Hensbroek MB, Palmer A, et al. Predictors of mortality in Gambian children with severe malaria anaemia. *Ann Trop Paediatr* 1997;17(4):355-9.
11. Brewster DR, Greenwood BM. Seasonal variation of paediatric diseases in The Gambia, west Africa. *Ann Trop Paediatr* 1993;13(2):133-46.
12. Nweneka CV, Doherty CP, Cox S, et al. Iron delocalisation in the pathogenesis of malarial anaemia. *Trans R Soc Trop Med Hyg* 2010;104(3):175-84.
13. Evans KJ, Hansen DS, van Rooijen N, et al. Severe malarial anemia of low parasite burden in rodent models results from accelerated clearance of uninfected erythrocytes. *Blood* 2006;107(3):1192-9.
14. Price RN, Simpson JA, Nosten F, et al. Factors contributing to anemia after uncomplicated falciparum malaria. *Am J Trop Med Hyg* 2001;65(5):614-22.
15. Ganz T. Molecular pathogenesis of anemia of chronic disease. *Pediatr Blood Cancer* 2006;46(5):554-7.
16. Ganz T. Heparin and its role in regulating systemic iron metabolism. *Hematology Am Soc Hematol Educ Program* 2006:29-35, 507.
17. Prentice AM, Doherty CP, Abrams SA, et al. Heparin is the major predictor of erythrocyte iron incorporation in anemic African children. *Blood* 2012;119(8):1922-8.
18. Nemeth E, Rivera S, Gabayan V, et al. IL-6 mediates hypoferrremia of inflammation by inducing the synthesis of the iron regulatory hormone hepcidin. *J Clin Invest* 2004;113(9):1271-6.
19. Lee P, Peng H, Gelbart T, et al. Regulation of hepcidin transcription by interleukin-1 and interleukin-6. *Proc Natl Acad Sci U S A* 2005;102(6):1906-10.
20. Atkinson SH, Rockett KA, Morgan G, et al. Tumor necrosis factor SNP haplotypes are associated with iron deficiency anemia in West African children. *Blood* 2008;112(10):4276-83.
21. Legssyer R, Ward RJ, Crichton RR, et al. Effect of chronic chloroquine administration on iron loading in the liver and reticuloendothelial system and on oxidative responses by the alveolar macrophages. *Biochem Pharmacol* 1999;57(8):907-11.
22. Ghigo D, Aldieri E, Todde R, et al. Chloroquine stimulates nitric oxide synthesis in murine, porcine, and human endothelial cells. *J Clin Invest* 1998;102(3):595-605.

23. Atkinson SH, Rockett K, Sirugo G, et al. Seasonal childhood anaemia in West Africa is associated with the haptoglobin 2-2 genotype. *PLoS Med* 2006;3(5):e172.
24. Doherty CP, Cox SE, Fulford AJ, et al. Iron incorporation and post-malaria anaemia. *PLoS One* 2008;3(5):e2133.
25. Worwood M. The laboratory assessment of iron status--an update. *Clin Chim Acta* 1997;259(1-2):3-23.
26. Hershko C, Bar-Or D, Gaziel Y, et al. Diagnosis of iron deficiency anemia in a rural population of children. Relative usefulness of serum ferritin, red cell protoporphyrin, red cell indices, and transferrin saturation determinations. *Am J Clin Nutr* 1981;34(8):1600-10.
27. Nwakanma DC, Gomez-Escobar N, Walther M, et al. Quantitative detection of Plasmodium falciparum DNA in saliva, blood, and urine. *J Infect Dis* 2009;199(11):1567-74.
28. Cooper RG, Magwere T. Chloroquine: novel uses & manifestations. *Indian J Med Res* 2008;127(4):305-16.
29. Wallace DJ. The use of chloroquine and hydroxychloroquine for non-infectious conditions other than rheumatoid arthritis or lupus: a critical review. *Lupus* 1996;5 Suppl 1:S59-64.
30. Drenou B, Guyader D, Turlin B, et al. Treatment of sideroblastic anemia with chloroquine. *N Engl J Med* 1995;332(9):614.
31. Reibnegger G, Boonpucknavig V, Fuchs D, et al. Urinary neopterin is elevated in patients with malaria. *Trans R Soc Trop Med Hyg* 1984;78(4):545-6.
32. Fuchs D, Hausen A, Reibnegger G, et al. Neopterin as a marker for activated cell-mediated immunity: application in HIV infection. *Immunol Today* 1988;9(5):150-5.
33. Brown AE, Herrington DA, Webster HK, et al. Urinary neopterin in volunteers experimentally infected with Plasmodium falciparum. *Trans R Soc Trop Med Hyg* 1992;86(2):134-6.
34. Dondorp AM, Nyanoti M, Kager PA, et al. The role of reduced red cell deformability in the pathogenesis of severe falciparum malaria and its restoration by blood transfusion. *Trans R Soc Trop Med Hyg* 2002;96(3):282-6.
35. Biemba G, Gordeuk VR, Thuma PE, et al. Prolonged macrophage activation and persistent anaemia in children with complicated malaria. *Trop Med Int Health* 1998;3(1):60-5.
36. van Hensbroek MB, Morris-Jones S, Meisner S, et al. Iron, but not folic acid, combined with effective antimalarial therapy promotes haematological recovery in African children after acute falciparum malaria. *Trans R Soc Trop Med Hyg* 1995;89(6):672-6.
37. Ojukwu JU, Okebe JU, Yahav D, et al. Oral iron supplementation for preventing or treating anaemia among children in malaria-endemic areas. *Cochrane Database Syst Rev* 2009(3):CD006589.
38. Verhoef H, West CE, Veenemans J, et al. Stunting may determine the severity of malaria-associated anemia in African children. *Pediatrics* 2002;110(4):e48.
39. Reyburn H, Mbatia R, Drakeley C, et al. Association of transmission intensity and age with clinical manifestations and case fatality of severe Plasmodium falciparum malaria. *Jama* 2005;293(12):1461-70.

1  
2  
3  
4  
5  
6  
7  
8  
9  
10  
11  
12  
13  
14  
15  
16  
17  
18  
19  
20  
21  
22  
23  
24  
25  
26  
27  
28  
29  
30  
31  
32  
33  
34  
35  
36  
37  
38  
39  
40  
41  
42  
43  
44  
45  
46  
47  
48  
49  
50  
51  
52  
53  
54  
55  
56  
57  
58  
59  
60

For peer review only

## TABLES

Table 1: Laboratory investigations conducted

| Investigations                                     | Specimen | Days collected <sup>†</sup>      | Purpose                                                                    |
|----------------------------------------------------|----------|----------------------------------|----------------------------------------------------------------------------|
| Microscopy for malaria parasite                    | Blood    | Days 0, 3, 7, 15, 30, 45, 70, 90 | To assess parasitaemia                                                     |
| Erythrocyte zinc protoporphyrin                    | Blood    | Days 0 & 3                       | To assess iron status                                                      |
| Full blood count                                   | Blood    | Days 0, 3, 7, 15, 30, 45, 70, 90 | To assess Hb change over time                                              |
| Automated reticulocyte percentage                  | Blood    | Days 3, 7, 15, 30, 45, 70, 90    | To monitor bone marrow response                                            |
| Quantitative PCR for <i>P.falciparum</i> parasites | Blood    | Days 0, 3, 7, 15, 30, 45, 70, 90 | To assess sub-microscopic parasitaemia                                     |
| Urinary neopterin concentration                    | Urine    | Days 3, 15, 30                   | To assess macrophage activation as measure of immune mediated inflammation |

<sup>†</sup> No blood was collected on days 7 and 70 in 2008

**Table 2: Baseline characteristics of all participants under surveillance**

|                                                                         | 2007         | 2008         | Combined     |
|-------------------------------------------------------------------------|--------------|--------------|--------------|
|                                                                         | N=1445       | N=1220       | N=2665       |
| Mean Age in months (SD)                                                 | 42.2 (17.2)  | 40.7 (17.7)  | 41.5 (17.5)  |
| Mean Weight-for-Height Z-scores (SD)                                    | -1.06 (0.84) | -1.02 (0.85) | -1.04 (0.84) |
| Mean Weight-for-Age Z-scores (SD)                                       | -1.48 (0.97) | -1.50 (0.94) | -1.49 (0.95) |
| Mean Height-for-Age Z-scores (SD)                                       | -1.06 (1.21) | -1.17 (1.13) | -1.11 (1.17) |
| Mean Body Mass Index (kg/m <sup>2</sup> ) (SD)                          | 14.6 (1.3)   | 14.7 (1.4)   | 14.6 (1.4)   |
| Prevalence of a malaria rapid test positive result during surveillance* | 105 (7.3)    | 49 (4.0)     | 154 (5.8)    |

\*only the first positive result is counted.

**Table 3: Baseline characteristics of children randomised to weekly chloroquine and weekly placebo in 2007 and 2008, pooled**

| Parameter                                                            | Chloroquine group<br>N=50  | Placebo group<br>N=46        |
|----------------------------------------------------------------------|----------------------------|------------------------------|
| Male sex (%)                                                         | 28 (56.0)                  | 24 (52.2)                    |
| Age in months, mean (SD)                                             | 41.9 (18.1)                | 38.7 (17.8)                  |
| Height-for-Age Z-scores, mean (SD)                                   | -1.19 (0.91)               | -0.94 (1.20)                 |
| Weight-for-Age Z-scores, mean (SD)                                   | -1.44 (0.95)               | -1.35 (0.87)                 |
| Weight-for-Height z scores, mean (SD)                                | -0.94 (0.90)               | -0.96 (0.79)                 |
| BMI (kg/m <sup>2</sup> ), mean (SD)                                  | 14.7 (1.4)                 | 14.7 (1.3)                   |
| Parasite density at recruitment (day 0),<br>geometric mean, (95% CI) | 47,783<br>(31,617 - 71120) | 32,496<br>(21,910, - 47,507) |
| Hb [g/L] at recruitment (Day 0), mean (SD)                           | 103.9 (14.2)               | 101.5 (14.8)                 |
| Hb [g/L] at baseline (Day 3), mean (SD)                              | 93.4 (9.6)                 | 93.7 (10.2)                  |
| Iron deficient <sup>1</sup> at baseline (Day 3) (%)                  | 23 (46)                    | 23 (50)                      |

<sup>1</sup> Iron deficiency was defined as  $Z_{\text{np}} \geq 61 \mu\text{mol/mol}$  of Hb &  $\text{MCV} \leq 73 \text{fl}$  &  $\text{MCH} \leq 25 \text{pg}$



**Table 4a: Predictors of final haemoglobin at day 90 using univariable linear regression**

| Parameter                                                                   | Regression coefficient (95%CI) | P-value |
|-----------------------------------------------------------------------------|--------------------------------|---------|
| Parasite count at recruitment (day 0)                                       | 3.5 (1.1, 5.8)                 | 0.004   |
| Sex                                                                         | -0.4 (-3.3, 2.5)               | 0.8     |
| Iron deficiency at baseline (day 3)                                         | -12.1 (-14.7, -9.5)            | <0.001  |
| Height-for-Age Z-scores (HAZ) <-2                                           | 3.2 (1.8, 4.6)                 | <0.001  |
| Weight-for-Age Z-scores (WAZ) <-2                                           | 2.6 (1.0, 4.2)                 | 0.001   |
| Weight-for-Height (WHZ) z scores <-2                                        | 0.1 (-1.6, 1.8)                | 0.9     |
| Age in months                                                               | 0.4 (0.3, 0.4)                 | <0.001  |
| Initial anti-malaria treatment arm                                          | 1.2 (-2.1, 4.4)                | 0.5     |
| CQ vs. placebo randomisation group                                          | -0.5 (-3.4, 2.5)               | 0.8     |
| Hb [g/L] at recruitment (day 0)                                             | 0.6 (0.5, 0.6)                 | <0.001  |
| Hb [g/L] at baseline (day 3)                                                | 0.7 (0.6, 0.8)                 | <0.001  |
| Village                                                                     | 1.9 (0.9, 3.0)                 | <0.001  |
| Presence of sub-microscopic parasitaemia at any time point during follow-up | 0.6 (-7.1, 8.2)                | 0.9     |
| Year of study                                                               | -1.3 (-4.4, 1.8)               | 0.4     |

**Table 4b: Independent predictors of final haemoglobin (day 90) using multivariable linear regression**

| <b>Parameter</b>            | <b>Regression coefficient<br/>(95% CI)</b> | <b>P value</b> |
|-----------------------------|--------------------------------------------|----------------|
| Day 0 Hb                    | 0.44 (0.36-0.52)                           | <0.001         |
| Presence of iron deficiency | -3.0 (-5.57, -0.43)                        | 0.022          |
| Height-for-age Z score <-2  | 1.48 (0.41, 2.56)                          | 0.007          |
| Age in months               | 0.21 (0.14, 0.28)                          | <0.001         |

*Model: Adjusted  $r^2=0.46$ ,  $F=76.6$ ,  $Prob>F <0.001$*

## Figure Legends

Figure 1: CONSORT Flow Diagram describing participants' movements in 2007 & 2008

Figure 2 Mean change in haemoglobin concentration at day 30 and day 90 from baseline at day 3 by treatment group for each year of study and for both years combined.

*Error bars represent the 95% confidence intervals*

*Change in Hemoglobin at day 3 is compared to haemoglobin concentration at presentation with malaria and initiation of anti-malaria treatment. Thereafter the comparison is with baseline levels at day 3 after completion of anti-malarial treatment. Error bars represent the 95% confidence intervals*

Figure 3. Percentage of participants with sub-microscopic malaria (qPCR) over time by post-malaria treatment group

Figure 4. Reticulocyte percentage as an indicator of bone marrow response by treatment group for both years combined.

Figure 5. Urinary neopterin by post-malaria treatment group

1  
2  
3  
4  
5  
6  
7  
8  
9  
10  
11  
12  
13  
14  
15  
16  
17  
18  
19  
20  
21  
22  
23  
24  
25  
26  
27  
28  
29  
30  
31  
32  
33  
34  
35  
36  
37  
38  
39  
40  
41  
42  
43  
44  
45  
46  
47  
48  
49  
50  
51  
52  
53  
54  
55  
56  
57  
58  
59  
60

For peer review only

**Randomised controlled trial of weekly chloroquine to re-establish normal erythron iron flux and haemoglobin recovery in post-malarial anaemia**

Chidi V Nweneke<sup>1\*</sup>, Sharon E Cox<sup>1,3\*</sup>, Conor P Doherty<sup>2</sup>, Anthony J Fulford<sup>1</sup>, Sophie E Moore<sup>1</sup>, Andrew M. Prentice<sup>1</sup>

**Affiliations**

Medical Research Council (MRC) International Nutrition Group, London School of Hygiene & Tropical Medicine, London, UK & MRC Keneba, The Gambia (CVN, SEC, SEM, AMP)  
Department of Paediatrics, Royal Hospital for Sick Children, Glasgow, UK (CPD)  
Muhimbili Wellcome Programme, Muhimbili University of Health & Allied Sciences, Dar es Salaam, Tanzania. (SEC)

\* Chidi V Nweneke & Sharon E Cox contributed equally to this manuscript.

**Correspondence and reprint request to:**

Andrew M. Prentice, MRC International Nutrition Group, LSHTM, Keppel Street, London WC1E 7HT, UK.  
E-mail: [Andrew.Prentice@lshtm.ac.uk](mailto:Andrew.Prentice@lshtm.ac.uk) Tel: +44-20-7958-8140 Fax: +44-20-7958-8111

**Sources of support:** This study was supported by the UK Medical Research Council (MC-A760-5QX00).

The funder had no role in the design, analysis or reporting of this trial.

**Running head:** Chloroquine in post-malarial anaemia

**Abbreviations used:** ACT, co-artemether; CQ-SP, chloroquine plus sulphadoxine-pyrimethamine; Hb, haemoglobin; MCH, mean cell haemoglobin; MCV, mean cell volume; RCT, randomised controlled trial; SMA, severe malarial anaemia; ZnPP, zinc protoporphyrin.

1  
2  
3  
4  
5  
6  
7  
8  
9  
10  
11  
12  
13  
14  
15  
16  
17  
18  
19  
20  
21  
22  
23  
24  
25  
26  
27  
28  
29  
30  
31  
32  
33  
34  
35  
36  
37  
38  
39  
40  
41  
42  
43  
44  
45  
46  
47  
48  
49  
50  
51  
52  
53  
54  
55  
56  
57  
58  
59  
60

2

**Trial registration:** The clinical trial registration number is NCT00473837 (ClinicalTrials.gov).

For peer review only

3

## Abstract

**Objective:** To determine if low-dose weekly chloroquine (CQ) therapy improves recovery from malaria-associated anaemia.

**Design:** Proof of concept randomised clinical trial.

**Setting:** West Kiang District, Lower River Region, The Gambia

**Participants:** Children resident in participating communities, aged 12-72 months with uncomplicated malaria identified using active case detection over two consecutive malaria transmission seasons.

**Interventions:** In 2007 eligible children were randomised to chloroquine-sulphadoxine/pyrimethamine (CQ-SP) or co-artemether (ACT) anti-malarial therapy, and after parasite clearance on Day 3 subsequently re-randomised (double-blind) to weekly low-dose CQ (5mg/kg) or placebo. In 2008 all eligible children were treated with ACT and subsequently randomised to CQ or placebo.

**Outcome measures:** The primary outcome was change in haemoglobin from baseline (Day 3 of anti-malarial treatment) to Day 90 in the CQ and placebo treatment arms. Secondary outcomes were changes in urinary neopterin as a marker of macrophage activation, markers of erythropoietic response and prevalence of sub-microscopic parasitaemia. Change in haemoglobin in the placebo arm by initial anti-malarial treatment was also assessed.

**Results:** In 2007 101 children with uncomplicated malaria were randomised to anti-malarial treatment with CQ-SP or ACT and 65 subsequently randomised to weekly CQ or placebo. In 2008 all children received ACT anti-malarial treatment and 31 subsequently randomised to weekly CQ or placebo. Follow up to Day 90 was 96%. There was no effect of weekly CQ vs. placebo on change in haemoglobin at Day 90, (CQ: +10.04 g/L [95% CI:6.66/13.42] vs. placebo: +7.61 g/L [95% CI:2.88/12.35]). There was no effect on the secondary outcomes assessed, or effect of initial anti-malarial therapy on haemoglobin recovery. Higher Day 90 haemoglobin independently correlated with older age, not being stunted, higher haemoglobin at Day 0 and adequate iron status at Day 3.

3

1  
2  
3  
4  
5  
6  
7  
8  
9  
10  
11  
12  
13  
14  
15  
16  
17  
18  
19  
20  
21  
22  
23  
24  
25  
26  
27  
28  
29  
30  
31  
32  
33  
34  
35  
36  
37  
38  
39  
40  
41  
42  
43  
44  
45  
46  
47  
48  
49  
50  
51  
52  
53  
54  
55  
56  
57  
58  
59  
60

**Conclusions:** Weekly low-dose CQ after effective anti-malarial treatment is not effective in improving recovery from post-malaria anaemia.

4

For peer review only

4



5

## Article Focus

- To determine if 3 months of low-dose weekly chloroquine (CQ) (5mg/kg) therapy after effective treatment of uncomplicated malaria can improve haemoglobin recovery after malaria-associated anaemia in rural African children.
- To test the hypothesis that chloroquine may enhance haematologic recovery after a malaria episode through its anti-inflammatory and immuno-modulatory actions, anti-macrophageal iron loading effect, and anti-malarial effect (despite widespread resistance).

## Key Messages

- Weekly low-dose CQ after effective anti-malarial treatment was not effective in improving recovery from mild to moderate post-malaria anaemia.
- Weekly low dose CQ at 5mg/kg had no clear effects on erythropoietic responses as determined by reticulocyte percentage, or immune-mediated inflammation as assessed by urinary neopterin, a marker of macrophage activation.

## Strengths and limitations

- The strengths of this study are its randomised design and double blinding of the allocation to weekly CQ or placebo and that few subjects were lost to follow-up. The continuous follow-up and active case detection for all children ensured that malaria infections were detected early and within similar time-frames, plus resurgent or new clinical infections were excluded from the analysis of haemoglobin change. A strict malaria case definition was adhered to and the measurement of sub-microscopic parasitaemia over time allowed the effects of incomplete treatment to be modelled.
- A limitation of the study was the need to recruit participants over 2 malaria transmission seasons and the significantly reduced malaria transmission rate in 2008 and thus reduced

5

recruitment-which also appeared to affect the severity of malaria in terms of parasite densities at first detection and haemoglobin concentrations. However, the confidence intervals of the effect size in the final multivariable analysis do not include the clinically significant effect size included in the sample size calculation and thus our observation is unlikely to be due to a type II error as a result of lack of power to detect a true effect.

- It is possible that the relatively low dose of CQ we used was insufficient to mediate the effects that we were testing for and we were unable to conduct pilot studies of CQ drug dosage and duration to determine the potential best treatment regime to test or of the timings of evaluation of possible mechanisms of effect.
- The change in design in 2008 to all children receiving ACT anti-malarial treatment did not affect the analysis of the primary outcome. The change did, however, limit our ability to determine the effect of initial anti-malaria therapy on haemoglobin response in the placebo group. An effect of anti-malarial treatment CQ on Hb, when in the context of adequate parasite clearance as was observed, might have been expected to occur in the early period of recovery.

7

## Introduction

The precise contribution of malaria to anaemia is difficult to calculate mainly because many anaemia-causing conditions co-exist in children living in malaria-endemic countries.<sup>1</sup> Murphy and Breman<sup>2</sup> estimate the annual incidence of severe malaria anaemia (SMA) to be 1.42 to 5.66 million resulting in between 194,000 to 974,000 deaths in children younger than five years. SMA increases the risk of death in children with malaria<sup>3</sup>, many of whom die shortly after admission before blood transfusion can be commenced<sup>4,5</sup> and after discharge in the community<sup>6</sup>. In addition, blood transfusion, the standard treatment for severe malaria anaemia exposes the child to the risk of transfusion-related infections like Human Immunodeficiency Virus (HIV) and hepatitis<sup>7</sup>. Among a nationally representative sample of children aged one to five years in The Gambia in 1999, 76% had a haemoglobin (Hb) less than 11g/dl and 15% had Hb less than 7g/dl<sup>8</sup>. It is likely that most of the cases of moderate to severe anaemia were due in great part to malaria<sup>9-11</sup>. A better understanding of the pathogenesis of malaria anaemia is required to improve its prevention and management.

Multiple immune and non-immune-mediated mechanisms cause anaemia during and after a malaria episode<sup>12</sup> including the destruction of non-parasitized erythrocytes which may account for more than 90% of erythrocyte loss<sup>13,14</sup>. One important component is inflammation-induced iron delocalisation which is characterised by sequestration of iron by the monocyte-macrophage system and hepatocytes, resulting in a state of pseudo-iron deficiency; a state that reverses after the inflammation has subsided<sup>12</sup>. The trans-membrane protein ferroportin is the exclusive route for cellular iron efflux and is responsible for releasing absorbed iron from enterocytes and sequestered iron from macrophages<sup>12,15,16</sup>. Hepcidin, the master-regulator of iron metabolism which responds both to iron status and inflammation<sup>15</sup>, blocks ferroportin. Clinically, malaria-induced inflammation has been shown to be associated with a hepcidin-mediated reduction in intestinal absorption of iron.

<sup>17</sup> Inflammatory cytokines, particularly IL-6 and IL-1 stimulate hepcidin release<sup>18,19</sup> resulting both in

7

8

1  
2  
3  
4  
5  
6  
7 reduced iron absorption of dietary iron and impaired macrophageal release of iron; the latter effect  
8 being quantitatively much more significant as macrophageal iron recycling and transport to the  
9 erythron is 25-30 fold greater than the influx of dietary iron. In this way hepcidin is the mediator of  
10 the anaemia of chronic disease<sup>15</sup>. TNF- $\alpha$  could also play a role in ferroportin-mediated iron transfer  
11 independent of hepcidin<sup>20</sup>. Rapid resolution of malaria-induced inflammation could therefore limit  
12 the degree and duration of malaria anaemia by reducing the duration of iron delocalisation.  
13  
14  
15  
16  
17

18 Chloroquine is a cheap and safe antimalarial with proven anti-inflammatory properties; and  
19 has been shown to reduce iron delocalisation *in vitro*<sup>21,22</sup>. We hypothesised that chloroquine may  
20 enhance haematologic recovery after a malaria episode through its anti-inflammatory and immuno-  
21 modulatory actions, anti-macrophageal iron loading effect, and anti-malarial effect (despite  
22 widespread resistance). We designed a proof of concept study to investigate the potential use of  
23 chloroquine in the management of mild post malaria anaemia.  
24  
25  
26  
27  
28  
29  
30  
31  
32  
33  
34  
35  
36  
37  
38  
39  
40  
41  
42  
43  
44  
45  
46  
47  
48  
49  
50  
51  
52  
53  
54  
55  
56  
57  
58  
59  
60

8

## Materials and Methods

### Study Design and population

This study was a population-based randomised, controlled trial (RCT) in children aged 12 to 72 months conducted over two malaria seasons in 2007 and 2008 in West Kiang District, Lower River Region, The Gambia. The study was initially designed and conducted as a 2x2 randomised placebo-controlled trial in 2007 but had to be changed, due to changes in national malaria treatment guidelines, to a two-arm RCT during the 2<sup>nd</sup> malaria transmission season in 2008. In the 2x2 phase of the study, children with malaria were initially openly randomised to receive a therapeutic dose regime of chloroquine plus sulphadoxine-pyrimethamine (CQ-SP) or co-artemether (ACT) (Day 0). After treatment, on Day 3, children were subsequently randomised (double blind) to weekly chloroquine or placebo until Day 90 (Figure 1). In the two-arm phase, all enrolled children with malaria were treated with ACT and then randomised and followed up as before (Figure 1). A combination of active and passive case detection was used to identify children in participating communities with malaria using a standard case definition of clinical malaria (see below).

The climate of this district is typical of sub-Saharan Africa with a long dry season lasting from November to June and a relatively short rainy season lasting from July to October. Malaria transmission is seasonal, hyperendemic and follows the rainy season, occurring between July and December. The prevalence of children experiencing one or more malaria episodes among a cohort of 1002 children aged between 1-6 years under active malaria surveillance during a population-based study in 2003 was 34% (Doherty et al. Unpublished data). During the study period standard malaria control activities in the district consisted of insecticide treated bednet distribution and case finding and treatment. In 2008 the standard first-line antimalarial treatment regimen for uncomplicated malaria in The Gambia was changed from CQ-SP to co-artemether.

### Inclusion & exclusion criteria

9

9

Eligibility for malaria surveillance and subsequent possible enrolment into the RCT included all children in the participating communities, aged between 12 and 72 months at the start of the surveillance period and who were not severely wasted, defined as weight-for-height Z scores less than -3SD.

Inclusion criteria for enrolment included: 1) uncomplicated malaria at Day 0, defined as a history of fever 48 hours prior to presentation or a measured temperature of 37.5°C or more with peripheral parasitaemia (asexual forms of *P. falciparum*  $\geq 500/\mu\text{L}$  by microscopy) on Day 0 of the study; and 2) for randomisation to the post-malaria intervention, children had to have a Hb between 69g/L - 110g/L on Day 3 with no peripheral parasitaemia.

Children were excluded from the RCT if they were: 1) unable to take oral medications; 2) had features of severe malaria;<sup>1</sup> 3) had a known haemoglobinopathy; 4) were enrolled in another project; 5) had already received antimalarial drugs from other sources outside the project team; or 6) were prescribed other drugs with potential antimalarial or anti-anaemic effects such as cotrimoxazole and haematinics.

Following randomisation to weekly CQ or placebo children were withdrawn from the study if: 1) they developed a second malaria episode or had life-threatening symptoms, more severe disease or serious adverse reactions; 2) left the study area for more than 14 days; 3) received antimalarials from other sources; or 4) Hb fell below 70g/L.

#### **Field and clinical procedures**

To effect the surveillance protocol, the study villages were divided into geographically adjacent clusters supervised by a resident study nurse who visited each village morning and evening and provided 24-hour clinical coverage to all enrolled children in their cluster. The active surveillance consisted of twice weekly temperature monitoring of enrolled children by village assistants; while the passive surveillance consisted of mothers referring sick children to the visiting study nurse. Children with fever – reported or measured – were screened for malaria using a rapid diagnostic test (MRDT) (Cortez diagnostics, INC, USA) after clinical evaluation. Children testing negative to the

MRDT were treated based on the likely diagnosis from the symptoms and signs. Children testing positive to the MRDT were commenced on antimalarials immediately (either CQ-SP or ACT in 2007, and ACT in 2008 for three days) and directly observed by the study nurse and managed as appropriate. Finger prick blood samples (days 7, 15, 30 & 70) were collected in an EDTA microtainer while venous blood (2mls – days 0 & 90; and 5mls – days 3 & 45) samples were collected in an EDTA vacutainer and sent to the study laboratory on the same day. Co-morbidities were treated as appropriate, avoiding co-trimoxazole and haematinics. For the subsequent visits after initial malaria diagnosis at Day 0, children were seen by the study nurse and blood samples and clinical data collected as per protocol. Only children who fulfilled the inclusion criteria for advancement to the weekly chloroquine/weekly placebo phase of the study were sampled after Day 3. These children were also followed up on days 15, 30, 45, 70 (except in 2008) and 90.

#### ***Randomisation and blinding***

The randomisation to malaria treatment group in 2007 (CQ-SP or ACT) was open (non-blinded to trial staff, investigators or participants) and was done by sequential assignment as children were identified. The block randomisation to the post-malaria treatment of weekly CQ or placebo in both 2007 and 2008 was double blinded and was carried out in blocks of eight. The randomisation codes were generated by a staff member independent of the study team and held by the external trial monitor. Treatment codes were labelled A to H and placed in sequentially numbered, opaque sealed envelopes held by the study nurses. Allocation to the treatment was by matching the code in the envelope to a bottle of the intervention labelled with the same code and then labelled with the subject ID.

#### ***Interventions***

For children openly randomised to malaria treatment at Day 0 with CQ-SP, children received chloroquine syrup (Chlormal®, Medreich Sterilab Ltd, Avalahalli, Bangalore, India) consisting of 50mg chloroquine base per 5mls as chloroquine phosphate at a dose of 10mg/kg for 3 days (days 0-2). SP (Micro Laboratories, India) was co-administered as a 525 mg tablet (500mg sulfadoxine and 25mg

12

pyrimethamine) on Day 0 only at a dose of ½ tablet/10kg. Children who were randomised to ACT treatment in 2007 and all children in 2008 received co-artemether (Coartem®) tablets (Beijing Novartis Pharma Ltd, Beijing China for Novartis Pharma AG, Basle, Switzerland) as blister packets of 6 tablets per card with each tablet containing 20mg artemether and 120mg lumefantrine. The treatment dose comprised a stat dose on Day 0 and then 8 hours later, followed by twice daily doses for the next two days with doses depending on body weight (5 - <15 kg – one tablet/dose; 15 - <25kg – 2 tablets/dose; 25 - <35kg – 3 tablets per dose).

During the second blinded phase of the trial children received either weekly CQ syrup (as above) but at a dose of 5mg/kg or matching placebo syrup (prepared by Royal Victoria Teaching Hospital pharmaceutical laboratory in collaboration with Atlantic Pharmaceuticals Limited, Latrikunda Sabiji, The Gambia) The syrups were in similar amber coloured bottles with matching caps and labels. Doses were administered in the child's home under direct observation by the study nurses who waited for at least 10 minutes after administering the drugs to ensure that they were not vomited.

#### **Primary and secondary outcomes**

The primary outcome measure was Hb change from Day 3 post treatment of malaria episode to Day 90 in the weekly CQ and placebo arms.

The secondary outcomes were to compare between the weekly CQ and placebo arms: (1-i) changes in erythropoietic response between Day 3 and Day 30; and (1-ii) between day 3 and day 90; (2) changes in urinary neopterin from Day 3 to Day 30 as a marker of macrophage activation; (3) prevalence of sub-microscopic malaria parasitaemia using PCR at each time point, and; (4) Hb change from Day 3 to Day 90 in the two placebo arms to investigate the effects of initial malaria treatment therapy.

#### **Sample size**

**Comment [tony1]:** Is this necessary ... at least it is not a post hoc estimate!

12



13

1  
2  
3  
4  
5  
6  
7 During initial study design we used a working assumption of a standard deviation (SD) for  
8 change in Hb of 15 g/l<sup>23</sup>. With power 80% and significance level set at 5% we estimated the sample  
9 sizes required to detect varying effect sizes for the primary outcome. A sample size of 65 per arm  
10 was estimated to be able to detect an effect size of 7.5g/l. This sample size was thought to be  
11 achievable and the effect size of likely public health significance.  
12  
13  
14  
15

#### 16 **Laboratory procedures:**

17  
18 Table 1 describes the different laboratory analysis conducted. Zinc protoporphyrin (ZnPP) as  
19 a marker of iron status was measured on fresh whole blood using a fluorometer (AVIV Biomedicals,  
20 Lakewood, NJ, USA). Full blood count (FBC), haemoglobin and automated reticulocyte count were  
21 performed using a Cell Dyne 3700 (Abbott Laboratories, Abbott Park, Illinois, USA). Iron deficiency  
22 was defined using 3 parameters; mean cell volume (MCV), mean cell haemoglobin (MCH) and ZnPP.  
23 The cut off values for the different parameters employed were:  $\geq 61 \mu\text{mol/mol}$  of Hb for ZnPP<sup>24</sup>,  $\leq 73 \text{fl}$   
24 for MCV<sup>25</sup> and  $\leq 25 \text{pg}$  for MCH<sup>25</sup>. Combining these parameters has been shown to increase their  
25 sensitivity and specificity to identify iron deficiency<sup>26</sup>. Malaria parasites were identified in a thick  
26 peripheral blood smear stained with Giemsa overnight and read by light microscope with x100  
27 magnification in oil immersion. Parasite DNA extraction and subsequent quantitative PCR  
28 amplification were carried out using established protocols<sup>27</sup>. In brief, DNA extraction was done using  
29 the Qlamp DNA Mini Kit (Qiagen<sup>TM</sup> Ltd. UK) according to the manufacturer's instructions with minor  
30 modifications. Extracted DNA samples were stored at -20°C. Quantification of parasite density was  
31 done with a TaqMan assay employing a fluorogenic probe to detect specific parasite products and  
32 using an Opticon<sup>®</sup> 2 Real Time PCR machine and Opticon<sup>TM</sup> version 3.1 software (Bio-Rad  
33 Laboratories, Inc., USA). Primers and probes were synthesized by Applied Biosystems, UK. Urinary  
34 neopterin levels were measured using an ELISA technique (BRAHMS Neopterin EIA, B.R.A.H.M.S,  
35 Germany). The stored urine was allowed to thaw at room temperature and then diluted 1:100 and  
36 the rest of the procedure was according to the manufacturer's instructions.  
37  
38  
39  
40  
41  
42  
43  
44  
45  
46  
47  
48  
49  
50  
51  
52  
53

#### 54 **Statistical analysis:**

13

Delta haemoglobin s Summary statistics are presented as means and standard deviations (SD) for normally distributed continuous variables, and counts and percentages for discrete variables. Neopterin and parasite count were not normally distributed and were log transformed ( $\log_e$  for neopterin and  $\log_{10}$  for parasite count). The geometric means and 95% confidence intervals are presented for log-transformed variables. Two-sided student's t tests were used to compare results between two treatment arms.

Visual inspection of Hb change between baseline at Day 3 and later time points by treatment arm suggested that by Day 30, Hb change in both treatment arms had reached a plateau. ~~Therefore Hb data from Day 30 to Day 90 were pooled for subsequent analysis. This pooled Hb is referred to as 'final Hb'.~~ To fully determine the effect of treatment group on Hb change we used random effects models using the repeat measures at day 30 and day 90. Initial malaria treatment group (CQ-SP vs ACT), Hb at recruitment (Day 0 Hb), baseline Hb (Day 3), age in months, year of study, and the child's village were included in models "a priori" and hence adjusted for.

Linear regression was used to investigate further potential predictors of Hb change in the study population. First, simple linear regression was used to assess the association of each predictor variable with Hb. Thereafter, all variables with a P-value of 0.1 or less were included in a multiple linear regression to assess confounding. The final regression model consisted of only the variables that maintained a significant association with Hb in the multiple regression models. All analyses were carried out using STATA version 8 (StataCorp, College Station, TX, USA).

#### **Ethical clearance**

The Scientific Coordinating Committee of the Medical Research Council (UK), The Gambia, and the MRC/Gambia Government Joint Ethical Committee approved the study (SCC 1076). Written informed consent was obtained from parents/guardians of the children prior to enrolment. The clinical trial registration number is NCT00473837 (ClinicalTrials.gov).

15

## Results

### Characteristics of the study population under malaria surveillance

**Figure 1** describes the flow of participants and reasons for exclusions in the study. In 2007, 1445 of 1817 (80%) potentially eligible children identified through the Keneba MRC DSS database from 14 villages were included in the malaria surveillance. In 2008, 1220 of the 1413 (86%) identified children from 5 of the original villages were included in the malaria surveillance (smaller villages were excluded as they had contributed few cases in 2007). **Table 2** describes the characteristics of the children placed under surveillance for malaria. The proportion of children with a positive malaria rapid test during surveillance (only first event per child counted) fell from 7.3% (105/1445) in 2007 to 4% (49/1220) in 2008. In the first year of the study, 101 (96%) of the children with a positive malaria rapid test were randomised to CQ-SP or ACT treatment, and 65 (64%) subsequently randomised at Day 3 to weekly chloroquine or placebo, with all children completing follow up until Day 30 and 33/34 completing follow-up until Day 90 in the weekly CQ and 28/31 in the weekly placebo group. In the second year of the study 31 of the 49 (63%) cases with a first positive malaria rapid test were subsequently randomised to weekly CQ or placebo after treatment with ACT, all of whom completed follow up until Day 90 (16 CQ & 15 placebo). ~~After determining a lack of change between Day 30 and Day 90 Hb measurements across all treatment groups it was decided to include the 4 children who were excluded after Day 30 of follow up due to development of a second malarial episode, in the analysis of "final Hb" by use of Hb at Day 30.~~ Thus 96 children were included in the analysis of the primary and secondary outcomes, except for the analysis of effect of initial malaria treatment within the placebo arms which included 31 children.

**Table 3** describes the characteristics of participants randomised to weekly chloroquine and weekly placebo for both years combined. Demographic and anthropometric characteristics were similar between the groups as was baseline Hb at Day 3. The prevalence of iron deficiency measured at baseline was 43.1% (28/65) in 2007 and 58.1% (18/31) in 2008 with a similar prevalence between

15

1  
2  
3  
4  
5  
6  
7 the CQ/placebo groups within each year (data not shown) and in both years combined. However  
8 parasite density was lower in the placebo group (Table 3). No adverse events were reported in  
9 either treatment group.  
10

### 11 12 **Effect of weekly CQ on haemoglobin change during follow-up**

13  
14 To assess the effect of weekly chloroquine on Hb recovery after clearance of peripheral  
15 parasitaemia, we compared change in Hb from Day 3 to Day 90 and Day 3 to Day 30 in the two arms.  
16  
17 No significant differences in Hb change between the two groups were observed, either for the data  
18  
19 ~~pooled~~ for both study years or for each study year separately (both years combined: change in Hb at  
20  
21 Day 90, CQ: +10.04 g/L [95% CI: 6.66, 13.42] vs. placebo: +7.61 g/L [95% CI: 2.88, 12.35]) (Figure 2).  
22  
23

24 Thus the effect size of the CQ treatment was 2.43 g/L [95% CI -3.38, 8.24] compared to the 7.5g/L we  
25  
26 included in the sample size calculation. However, at Day 15, children receiving weekly CQ had an  
27  
28 increase of 3.5 g/L (95% CI: 0.5, 6.4) compared to 0.8g/L (95% CI: -2.3, 3.9) in children in the placebo  
29  
30 arm, but this difference did not reach statistical significance (p=0.2). The lack of effect of The-weekly  
31  
32 CQ remained overall result was unchanged when adjusting for factors determined 'a priori' (Hb at  
33  
34 recruitment (Day 0), Hb at baseline (Day 3), age (in months), year of study, initial treatment received  
35  
36 (CQ-SP vs ACT), and village group) using a random effects repeated measures model including Hb  
37  
38 measured at day 30 and day 90 (coefficient =1.43 [95% CI: -1.70, 4.57]). Furthermore, adding parasite  
39  
40 density at recruitment, presence of sub-microscopic parasitaemia at any time point during follow-  
41  
42 up, and presence of iron deficiency had no effect on the estimates of effect for CQ vs. placebo  
43  
44 treatment during follow-up (data not shown).

### 45 46 **Predictors of haemoglobin at Day 90**

47  
48 In the absence of an effect of weekly CQ on Hb change after successful malaria treatment,  
49  
50 we assessed what other factors might determine final Hb. Using simple linear regression significant  
51  
52 positive associations were observed for parasite density at Day 0, better nutritional status, age, Hb  
53  
54 at Day 0 at malaria diagnosis and Day 3 of successful treatment. Presence of iron deficiency at  
55  
56 baseline was associated with significantly lower final Hb. There was no apparent effect of initial  
57  
58  
59  
60

17

1  
2  
3  
4  
5  
6  
7 malaria treatment (CQ-SP vs. ACT) (**Table 4a**). In a final multiple regression model, Hb at Day 0 was  
8 the strongest predictor of final Hb and other independent predictors of final haemoglobin were  
9 presence of iron deficiency at Day 3, degree of stunting (height-for-age Z score), and age (in  
10 months). Children with higher Hb at diagnosis and older children had greater final Hb. Children with  
11 iron deficiency at Day 3 had significantly lower final Hb with a mean difference of 12.1g/L (**Table 4b**).  
12  
13

#### 14 **Effect of initial anti-malaria treatment (CQ-SP vs ACT) on haemoglobin change**

15  
16  
17  
18 A secondary outcome of this study was Hb change from Day 3 to Day 30 and Day 90 in the  
19 placebo arm to determine whether initial anti-malaria treatment (CQ-SP or ACT) treatment affected  
20 macrophage iron loading in acute clinical malaria and its subsequent release. [As indicated in the](#)  
21 [analysis of Hb at Day 90 there was no significant effect of initial anti-malarial treatment. Please see](#)  
22 [Supplementary Figure 2](#) depicting Hb change during follow up from Day 0 to Day 90 in the placebo  
23 arm by initial antimalarial treatment received [and the accompanying text](#).  
24  
25  
26  
27  
28

#### 29 **Sub-microscopic parasitaemia, inflammation, bone marrow response, haemoglobin change and** 30 **treatment groups**

31  
32  
33 Sub-microscopic parasitaemia was commonest in the first seven days of acute phase follow  
34 up (days 3-15). By Day 30, most were negative (77%). The prevalence of sub-microscopic  
35 parasitaemia at days 30 and 90 combined was 15.1% and there was no evidence of an effect of post-  
36 malaria treatment group or of initial anti-malarial treatment (**Figure 3 & Supplementary Figure 24b**).  
37 Most of the sub-microscopic parasitaemia at these time points was of a very low level (one to two  
38 parasites per microliter). However, higher parasite density at diagnosis was associated with an  
39 increased likelihood of subsequent sub-microscopic parasitaemia at day 30 or 90 with a one log  
40 increase in parasite count increasing the odds of having sub-microscopic parasitaemia by 1.6  
41 (P=0.005). Although the presence/absence of sub-microscopic parasitaemia during follow up (days  
42 30 & 90) was not associated with final Hb (**Table 4**), in children with high qPCR (quantitative PCR  
43 parasite count) parasite count (> 500/ $\mu$ L, N=3) at Day 30, Hb at Day 30 was significantly lower  
44 compared to children with one to two parasites/ $\mu$ L or none at Day 30 (82.3g/L vs 102.8g/L; p = 0.01).  
45  
46  
47  
48  
49  
50  
51  
52  
53  
54

17

1  
2  
3  
4  
5  
6  
7 Similarly, the mean Hb change was also reduced in those with persistent high parasitaemia at Day 30  
8 (-5.0g/L vs. 8.5g/L; mean Hb difference (95%CI): 13.5g/L (-0.3, 27.3);  $p = 0.06$ ). Bone marrow  
9 response as assessed by percentage of reticulocytes peaked at Day 15 (4.5% in both treatment  
10 groups combined), compared to similar levels of around 2% at all other measured time points (Days  
11 3, 7, 15 & 90). There was no evidence of an effect of either post-malaria treatment group (**Figure 4**)  
12 or of initial anti-malarial therapy (~~data not shown~~)(**Figure 5**) on bone marrow response (~~data not~~  
13 ~~shown~~). Urinary neopterin, a product of activated macrophages and therefore a marker of a pro-  
14 inflammatory immune status, was strongly associated with qPCR parasite count at Day 30  
15 (regression coefficient: 0.2 (95%CI: 0.08, 0.33),  $p = 0.003$ ; adjusted  $R^2 = 0.4091$ ) and was also  
16 associated with Hb at Day 30. There was no evidence of an effect of post-malaria treatment group  
17 (**Figure 5**) or of initial anti-malarial treatment on neopterin concentrations (**Figure S3**).  
18  
19  
20  
21  
22  
23  
24  
25  
26  
27  
28  
29  
30  
31  
32  
33  
34  
35  
36  
37  
38  
39  
40  
41  
42  
43  
44  
45  
46  
47  
48  
49  
50  
51  
52  
53  
54  
55  
56  
57  
58  
59  
60

19

## Discussion

Chloroquine is used in the treatment of several diseases in addition to its antimalarial use<sup>28</sup>  
<sup>29</sup>. However, we believe this to be the first study to assess its potential role in the management of  
post-malaria anaemia. We hypothesised that since malarial anaemia is essentially a systemic  
inflammatory response to infection<sup>12</sup>, chloroquine, by suppressing plasmodium-induced  
inflammation, could enhance erythropoietic recovery. We tested this hypothesis by comparing two  
groups of children – one group receiving weekly chloroquine and the other group weekly placebo  
after complete clearance of peripheral parasitaemia as determined by microscopy. The primary  
outcome measure was the recovery in Hb at Days 30 and 90 compared to Day 3 Hb levels. Our  
results showed no significant difference in the Hb change between the two groups. The data was  
interrogated further by a random effects model [modelling data at Day 30 and Day 90](#)  
[simultaneously whilst adjusting for Hb at Day 3 and](#) taking into account random measurement errors  
and missing data. This confirmed that weekly chloroquine at 5mg/kg body weight did not improve  
Hb recovery after uncomplicated clinical malaria. There was a suggestion that weekly CQ may have  
increased the rate of recovery in Hb change at Day 15 accompanied by non-significantly increased  
reticulocyte percentage.

A limitation of the study was the need to recruit participants over 2 malaria transmission  
seasons. In 2008 there was a reduced malaria transmission rate and thus fewer cases available for  
recruitment and also an apparent effect on the severity of malaria in terms of parasite densities at  
first detection and effect on haemoglobin concentrations, with a significantly higher baseline Hb in  
2008. However, the change in design that was necessitated in 2008 did not change the primary  
outcome analysis. [Furthermore, the confidence intervals of the observed effect size in the final](#)  
[multivariable analysis do not include the effect size included in the sample size calculation and thus](#)  
[our observation is unlikely to be due to a type II error as a result of lack of power to detect a true](#)  
[effect of this magnitude.-](#)

19

20

1  
2  
3  
4  
5  
6  
7 The change in design in 2008 to all children receiving ACT anti-malarial treatment did not  
8 affect the analysis of the primary outcome. The change did, however, limit our ability to determine  
9 the effect of initial anti-malaria therapy on haemoglobin response in the placebo group. An effect of  
10 anti-malarial treatment CQ on Hb, when in the context of adequate parasite clearance as was  
11 observed, might have been expected to occur in the early period of recovery.  
12  
13  
14  
15

16 The recommended anti-inflammatory dose of CQ is 3-4mg/kg/day. However, due to lack of  
17 safety data for this condition and considering potential adverse effects, particularly retinal damage,  
18 we used the lower prophylactic dose of 5mg/kg/week. Using this low dose might have contributed  
19 to our inability to detect an effect of CQ. Drenou et al<sup>30</sup> reported the successful control of  
20 sideroblastic anaemia (a condition of reduced incorporation of iron into haem in the presence of  
21 sufficient or high iron) was for six years on 100mg daily chloroquine without need for blood  
22 transfusion.  
23  
24  
25  
26  
27  
28

29 We had hypothesized that chloroquine will impede macrophageal iron sequestration during  
30 the acute clinical episode and improve iron availability for the process of erythropoiesis. Urinary  
31 excretion of neopterin is markedly increased in individuals infected with malaria, and corresponds to  
32 concurrent activation of T cells and macrophages<sup>31-33</sup>. We measured the urinary neopterin at Days 3,  
33 15 and 30 and expected to see a more rapid decline in neopterin level in the weekly chloroquine  
34 group than in the weekly placebo group; but no difference between the treatment groups was  
35 observed. It is possible that a difference may have occurred at an intermediate time point between  
36 Day 3 and Day 15, when levels had already almost normalised. Indeed, Brown et al<sup>33</sup> showed that in  
37 a group of volunteers experimentally infected with *plasmodium* parasites, the timing of maximum  
38 neopterin excretion coincided with the treatment and elimination of parasitaemia. In our study, this  
39 would coincide with study Days 0 to 3. In future, it might be more informative to carry out more  
40 measurements during the first week of malaria diagnosis.  
41  
42  
43  
44  
45  
46  
47  
48  
49  
50  
51

52 The participants were followed up for 90 days because reports had suggested that Hb  
53 continues to fall even after successful malaria treatment primarily due to continuing inflammation<sup>34</sup>  
54  
55

20



21

<sup>35</sup>. In this study we found no evidence of persistent inflammation, except in the few cases with remaining parasitaemia at Day 30, who also had decreased absolute Hb and Hb change at Day 30 compared with children with no parasitaemia or parasite counts of 1-2/microlitre.

Our observation that children with higher Hb at diagnosis had greater Hb recovery is potentially paradoxical as one would have expected the reverse through statistical regression to the mean and greater 'catch up' in children with lower starting Hb at Day 3. However, as the majority of iron used for Hb recovery is recycled<sup>24</sup>, those with higher Hb at Day 0 have more iron available for recovery. Our non-provision of exogenous iron during the study may have restricted the ability of the more anaemic children to respond appropriately as suggested by our observation of reduced Hb recovery in children with apparent iron deficiency at Day 0. An earlier study in Gambian children showed improved haematological recovery in children treated for malaria and co-supplemented with iron compared to placebo<sup>36</sup>. However, we have also shown in Gambian children reduced iron absorption from supplementation in post-malarial anaemia, whilst also experiencing greater Hb recovery compared to supplemented children with iron-deficiency anaemia. Thus causing us to question the efficacy of iron supplementation given within 2 weeks of anti-malarial treatment<sup>24</sup>. Without the inclusion of a further randomised treatment arm of post-malarial treatment iron supplementation it is not possible to make further recommendations concerning the recent argument for the provision of iron supplementation to children in malaria endemic areas with regular malaria surveillance and treatment facilities<sup>37</sup>.

Our finding that stunted children recovered Hb poorly is consistent with an earlier report of stunting being a determinant of the severity of malaria-associated anaemia<sup>38</sup>. In our population this effect was independent of iron status.

Age has been shown to be strongly associated with risk of severe anaemia in children with acute malaria; the risk decreasing with increasing age<sup>39</sup>. In addition, we have shown in this study that older children recover better from anaemia after an acute malaria episode than younger children.

21

Paying special attention to younger children with malaria anaemia could reduce malaria related mortality in children.

In conclusion, weekly chloroquine administered for three months to children with mild malaria anaemia at a dose of 5mg/kg/week resulted in no improvement in erythropoietic recovery compared to placebo. Older children, children with higher initial Hb, less stunting at diagnosis, and without iron deficiency had better Hb recovery post-malaria. Similar to other reports in the literature, urinary neopterin was elevated during acute malaria. The role of iron deficiency in erythropoietic recovery post malaria noted in this study suggests areas for further detailed investigation of the clinical value in administering both antimalarial and iron supplementation to children with malaria anaemia residing in areas of high iron deficiency and malaria burden.

**Acknowledgements**

The authors wish to acknowledge the contribution of all the members of the field team – Kabiru Ceesay, Edrisa Sinjanka, Lamin Ceesay, Lamin Sowe, Kalilu Sanneh, Bakary Sarr, Muhammed Sidibeh, Yahya Sanyang, the data staff especially Jahid Hassan and Musa Jarjou, the laboratory staff especially Musa Colley, Karamo Camara, Mustapha Bittaye, and Ebrimah Danso, all the drivers of the MRC Keneba, Ms Cheryl Eniyou O, Mrs Fatou Noho, Ms Jankey Jagne, all the village assistants, and the study subjects and their parents.

**Authorship contributions**

CVN, CPD and AMP conceived the study with input from SEC. CVN led all practical aspects of the work with logistic and funding support from SEM and AMP. CVN, SEC and AJF were responsible for the statistical analysis and interpretation. CVN and SEC drafted the paper with input and approval from all authors.

**Disclosure of Conflicts of Interest**

The authors have no conflict of interest.

## References

1. Severe falciparum malaria. World Health Organization, Communicable Diseases Cluster. *Trans R Soc Trop Med Hyg* 2000;94 Suppl 1:S1-90.
2. Murphy SC, Breman JG. Gaps in the childhood malaria burden in Africa: cerebral malaria, neurological sequelae, anemia, respiratory distress, hypoglycemia, and complications of pregnancy. *Am J Trop Med Hyg* 2001;64(1-2 Suppl):57-67.
3. Brabin BJ, Premji Z, Verhoeff F. An analysis of anemia and child mortality. *J Nutr* 2001;131(2S-2):636S-45S; discussion 46S-48S.
4. Bojang KA, Palmer A, Boele van Hensbroek M, Banya WA, Greenwood BM. Management of severe malarial anaemia in Gambian children. *Trans R Soc Trop Med Hyg* 1997;91(5):557-61.
5. Mulenga M, Malunga F, Bennett S, Thuma PE, Shulman C, Fielding K, et al. A randomised, double-blind, placebo-controlled trial of atovaquone-proguanil vs. sulphadoxine-pyrimethamine in the treatment of malarial anaemia in Zambian children. *Trop Med Int Health* 2006;11(11):1643-52.
6. Phiri KS, Calis JC, Faragher B, Nkhoma E, Ng'oma K, Mangochi B, et al. Long term outcome of severe anaemia in Malawian children. *PLoS ONE* 2008;3(8):e2903.
7. Lackritz EM. Prevention of HIV transmission by blood transfusion in the developing world: achievements and continuing challenges. *Aids* 1998;12 Suppl A:S81-6.
8. NaNA. Nationwide survey on the prevalence of Vitamin A and Iron deficiency in women and children in The Gambia. National Nutrition Survey. Banjul: National Nutrition Agency/Medical Research Council, 2001.
9. Abdalla SH. Iron and folate status in Gambian children with malaria. *Ann Trop Paediatr* 1990;10(3):265-72.
10. Bojang KA, Van Hensbroek MB, Palmer A, Banya WA, Jaffar S, Greenwood BM. Predictors of mortality in Gambian children with severe malaria anaemia. *Ann Trop Paediatr* 1997;17(4):355-9.
11. Brewster DR, Greenwood BM. Seasonal variation of paediatric diseases in The Gambia, west Africa. *Ann Trop Paediatr* 1993;13(2):133-46.
12. Nweneka CV, Doherty CP, Cox S, Prentice A. Iron delocalisation in the pathogenesis of malarial anaemia. *Trans R Soc Trop Med Hyg* 2010;104(3):175-84.
13. Evans KJ, Hansen DS, van Rooijen N, Buckingham LA, Schofield L. Severe malarial anemia of low parasite burden in rodent models results from accelerated clearance of uninfected erythrocytes. *Blood* 2006;107(3):1192-9.
14. Price RN, Simpson JA, Nosten F, Luxemburger C, Hkirjaroen L, ter Kuile F, et al. Factors contributing to anemia after uncomplicated falciparum malaria. *Am J Trop Med Hyg* 2001;65(5):614-22.
15. Ganz T. Molecular pathogenesis of anemia of chronic disease. *Pediatr Blood Cancer* 2006;46(5):554-7.
16. Ganz T. Hepcidin and its role in regulating systemic iron metabolism. *Hematology Am Soc Hematol Educ Program* 2006:29-35, 507.
17. Prentice AM, Doherty CP, Abrams SA, Cox SE, Atkinson SH, Verhoef H, et al. Hepcidin is the major predictor of erythrocyte iron incorporation in anemic African children. *Blood* 2012;119(8):1922-8.
18. Nemeth E, Rivera S, Gabayan V, Keller C, Taudorf S, Pedersen BK, et al. IL-6 mediates hypoferremia of inflammation by inducing the synthesis of the iron regulatory hormone hepcidin. *J Clin Invest* 2004;113(9):1271-6.
19. Lee P, Peng H, Gelbart T, Wang L, Beutler E. Regulation of hepcidin transcription by interleukin-1 and interleukin-6. *Proc Natl Acad Sci U S A* 2005;102(6):1906-10.

25

20. Atkinson SH, Rockett KA, Morgan G, Bejon PA, Sirugo G, O'Connell MA, et al. Tumor necrosis factor SNP haplotypes are associated with iron deficiency anemia in West African children. *Blood* 2008;112(10):4276-83.
21. Legssyer R, Ward RJ, Crichton RR, Boelaert JR. Effect of chronic chloroquine administration on iron loading in the liver and reticuloendothelial system and on oxidative responses by the alveolar macrophages. *Biochem Pharmacol* 1999;57(8):907-11.
22. Ghigo D, Aldieri E, Todde R, Costamagna C, Garbarino G, Pescarmona G, et al. Chloroquine stimulates nitric oxide synthesis in murine, porcine, and human endothelial cells. *J Clin Invest* 1998;102(3):595-605.
23. Atkinson SH, Rockett K, Sirugo G, Bejon PA, Fulford A, O'Connell MA, et al. Seasonal childhood anaemia in West Africa is associated with the haptoglobin 2-2 genotype. *PLoS Med* 2006;3(5):e172.
24. Doherty CP, Cox SE, Fulford AJ, Austin S, Hilmers DC, Abrams SA, et al. Iron incorporation and post-malaria anaemia. *PLoS One* 2008;3(5):e2133.
25. Worwood M. The laboratory assessment of iron status--an update. *Clin Chim Acta* 1997;259(1-2):3-23.
26. Hershko C, Bar-Or D, Gaziel Y, Naparstek E, Konijn AM, Grossowicz N, et al. Diagnosis of iron deficiency anemia in a rural population of children. Relative usefulness of serum ferritin, red cell protoporphyrin, red cell indices, and transferrin saturation determinations. *Am J Clin Nutr* 1981;34(8):1600-10.
27. Nwakanma DC, Gomez-Escobar N, Walther M, Crozier S, Dubovsky F, Malkin E, et al. Quantitative detection of Plasmodium falciparum DNA in saliva, blood, and urine. *J Infect Dis* 2009;199(11):1567-74.
28. Cooper RG, Magwere T. Chloroquine: novel uses & manifestations. *Indian J Med Res* 2008;127(4):305-16.
29. Wallace DJ. The use of chloroquine and hydroxychloroquine for non-infectious conditions other than rheumatoid arthritis or lupus: a critical review. *Lupus* 1996;5 Suppl 1:S59-64.
30. Drenou B, Guyader D, Turlin B, Fauchet R. Treatment of sideroblastic anemia with chloroquine. *N Engl J Med* 1995;332(9):614.
31. Reibnegger G, Boonpucknavig V, Fuchs D, Hausen A, Schmutzhard E, Wachter H. Urinary neopterin is elevated in patients with malaria. *Trans R Soc Trop Med Hyg* 1984;78(4):545-6.
32. Fuchs D, Hausen A, Reibnegger G, Werner ER, Dierich MP, Wachter H. Neopterin as a marker for activated cell-mediated immunity: application in HIV infection. *Immunol Today* 1988;9(5):150-5.
33. Brown AE, Herrington DA, Webster HK, Clyde DF, Szein MB, Davis JR, et al. Urinary neopterin in volunteers experimentally infected with Plasmodium falciparum. *Trans R Soc Trop Med Hyg* 1992;86(2):134-6.
34. Dondorp AM, Nyanoti M, Kager PA, Mithwani S, Vreeken J, Marsh K. The role of reduced red cell deformability in the pathogenesis of severe falciparum malaria and its restoration by blood transfusion. *Trans R Soc Trop Med Hyg* 2002;96(3):282-6.
35. Biemba G, Gordeuk VR, Thuma PE, Mabeza GF, Weiss G. Prolonged macrophage activation and persistent anaemia in children with complicated malaria. *Trop Med Int Health* 1998;3(1):60-5.
36. van Hensbroek MB, Morris-Jones S, Meisner S, Jaffar S, Bayo L, Dackour R, et al. Iron, but not folic acid, combined with effective antimalarial therapy promotes haematological recovery in African children after acute falciparum malaria. *Trans R Soc Trop Med Hyg* 1995;89(6):672-6.
37. Ojukwu JU, Okebe JU, Yahav D, Paul M. Oral iron supplementation for preventing or treating anaemia among children in malaria-endemic areas. *Cochrane Database Syst Rev* 2009(3):CD006589.

25

1  
2  
3  
4  
5  
6  
7  
8  
9  
10  
11  
12  
13  
14  
15  
16  
17  
18  
19  
20  
21  
22  
23  
24  
25  
26  
27  
28  
29  
30  
31  
32  
33  
34  
35  
36  
37  
38  
39  
40  
41  
42  
43  
44  
45  
46  
47  
48  
49  
50  
51  
52  
53  
54  
55  
56  
57  
58  
59  
60

26

38. Verhoef H, West CE, Veenemans J, Beguin Y, Kok FJ. Stunting may determine the severity of malaria-associated anemia in African children. *Pediatrics* 2002;110(4):e48.

39. Reyburn H, Mbatia R, Drakeley C, Bruce J, Carneiro I, Olomi R, et al. Association of transmission intensity and age with clinical manifestations and case fatality of severe Plasmodium falciparum malaria. *Jama* 2005;293(12):1461-70.

For peer review only

26

27

## TABLES

**Table 1: Laboratory investigations conducted**

| Investigations                                     | Specimen | Days collected <sup>†</sup>      | Purpose                                                                    |
|----------------------------------------------------|----------|----------------------------------|----------------------------------------------------------------------------|
| Microscopy for malaria parasite                    | Blood    | Days 0, 3, 7, 15, 30, 45, 70, 90 | To assess parasitaemia                                                     |
| Erythrocyte zinc protoporphyrin                    | Blood    | Days 0 & 3                       | To assess iron status                                                      |
| Full blood count                                   | Blood    | Days 0, 3, 7, 15, 30, 45, 70, 90 | To assess Hb change over time                                              |
| Automated reticulocyte percentage                  | Blood    | Days 3, 7, 15, 30, 45, 70, 90    | To monitor bone marrow response                                            |
| Quantitative PCR for <i>P.falciparum</i> parasites | Blood    | Days 0, 3, 7, 15, 30, 45, 70, 90 | To assess sub-microscopic parasitaemia                                     |
| Urinary neopterin concentration                    | Urine    | Days 3, 15, 30                   | To assess macrophage activation as measure of immune mediated inflammation |

<sup>†</sup>No blood was collected on days 7 and 70 in 2008

27

**Table 2: Baseline characteristics of all participants under surveillance**

|                                                                         | 2007         | 2008         | Combined     |
|-------------------------------------------------------------------------|--------------|--------------|--------------|
|                                                                         | N=1445       | N=1220       | N=2665       |
| Mean Age in months (SD)                                                 | 42.2 (17.2)  | 40.7 (17.7)  | 41.5 (17.5)  |
| Mean Weight-for-Height Z-scores (SD)                                    | -1.06 (0.84) | -1.02 (0.85) | -1.04 (0.84) |
| Mean Weight-for-Age Z-scores (SD)                                       | -1.48 (0.97) | -1.50 (0.94) | -1.49 (0.95) |
| Mean Height-for-Age Z-scores (SD)                                       | -1.06 (1.21) | -1.17 (1.13) | -1.11 (1.17) |
| Mean Body Mass Index (kg/m <sup>2</sup> ) (SD)                          | 14.6 (1.3)   | 14.7 (1.4)   | 14.6 (1.4)   |
| Prevalence of a malaria rapid test positive result during surveillance* | 105 (7.3)    | 49 (4.0)     | 154 (5.8)    |

\*only the first positive result is counted.



29

**Table 3: Baseline characteristics of children randomised to weekly chloroquine and weekly placebo in 2007 and 2008, pooled**

| Parameter                                                            | Chloroquine group<br>N=50  | Placebo group<br>N=46        |
|----------------------------------------------------------------------|----------------------------|------------------------------|
| Male sex (%)                                                         | 28 (56.0)                  | 24 (52.2)                    |
| Age in months, mean (SD)                                             | 41.9 (18.1)                | 38.7 (17.8)                  |
| Height-for-Age Z-scores, mean (SD)                                   | -1.19 (0.91)               | -0.94 (1.20)                 |
| Weight-for-Age Z-scores, mean (SD)                                   | -1.44 (0.95)               | -1.35 (0.87)                 |
| Weight-for-Height z scores, mean (SD)                                | -0.94 (0.90)               | -0.96 (0.79)                 |
| BMI (kg/m <sup>2</sup> ), mean (SD)                                  | 14.7 (1.4)                 | 14.7 (1.3)                   |
| Parasite density at recruitment (day 0),<br>geometric mean, (95% CI) | 47,783<br>(31,617 - 71120) | 32,496<br>(21,910, - 47,507) |
| Hb [g/L] at recruitment (Day 0), mean (SD)                           | 103.9 (14.2)               | 101.5 (14.8)                 |
| Hb [g/L] at baseline (Day 3), mean (SD)                              | 93.4 (9.6)                 | 93.7 (10.2)                  |
| Iron deficient <sup>1</sup> at baseline (Day 3) (%)                  | 23 (46)                    | 23 (50)                      |

<sup>1</sup> Iron deficiency was defined as  $Z_{\text{np}} \geq 61 \mu\text{mol/mol}$  of Hb &  $\text{MCV} \leq 73 \text{fl}$  &  $\text{MCH} \leq 25 \text{pg}$

29

30

**Table 4a: Predictors of final haemoglobin at day 90 using univariable linear regression**

| Parameter                                                                   | Regression coefficient (95%CI) | P-value |
|-----------------------------------------------------------------------------|--------------------------------|---------|
| Parasite count at recruitment (day 0)                                       | 3.5 (1.1, 5.8)                 | 0.004   |
| Sex                                                                         | -0.4 (-3.3, 2.5)               | 0.8     |
| Iron deficiency at baseline (day 3)                                         | -12.1 (-14.7, -9.5)            | <0.001  |
| Height-for-Age Z-scores (HAZ) <-2                                           | 3.2 (1.8, 4.6)                 | <0.001  |
| Weight-for-Age Z-scores (WAZ) <-2                                           | 2.6 (1.0, 4.2)                 | 0.001   |
| Weight-for-Height (WHZ) z scores <-2                                        | 0.1 (-1.6, 1.8)                | 0.9     |
| Age in months                                                               | 0.4 (0.3, 0.4)                 | <0.001  |
| Initial anti-malaria treatment arm                                          | 1.2 (-2.1, 4.4)                | 0.5     |
| CQ vs. placebo randomisation group                                          | -0.5 (-3.4, 2.5)               | 0.8     |
| Hb [g/L] at recruitment (day 0)                                             | 0.6 (0.5, 0.6)                 | <0.001  |
| Hb [g/L] at baseline (day 3)                                                | 0.7 (0.6, 0.8)                 | <0.001  |
| Village                                                                     | 1.9 (0.9, 3.0)                 | <0.001  |
| Presence of sub-microscopic parasitaemia at any time point during follow-up | 0.6 (-7.1, 8.2)                | 0.9     |
| Year of study                                                               | -1.3 (-4.4, 1.8)               | 0.4     |

30

31

**Table 4b: Independent predictors of final haemoglobin (day 90) using multivariable linear regression**

| Parameter                   | Regression coefficient<br>(95% CI) | P value |
|-----------------------------|------------------------------------|---------|
| Day 0 Hb                    | 0.44 (0.36-0.52)                   | <0.001  |
| Presence of iron deficiency | -3.0 (-5.57, -0.43)                | 0.022   |
| Height-for-age Z score <-2  | 1.48 (0.41, 2.56)                  | 0.007   |
| Age in months               | 0.21 (0.14, 0.28)                  | <0.001  |

*Model: Adjusted  $r^2=0.46$ ,  $F=76.6$ ,  $Prob>F <0.001$*

31

### Figure Legends

Figure 1: CONSORT Flow Diagram describing participants' movements in 2007 & 2008

Figure 2 Mean change in haemoglobin concentration at day 30 and day 90 from baseline at day 3 by treatment group for each year of study and for both years combined.

*Error bars represent the 95% confidence intervals*

*Change in Hemoglobin at day 3 is compared to haemoglobin concentration at presentation with malaria and initiation of anti-malaria treatment. Thereafter the comparison is with baseline levels at day 3 after completion of anti-malarial treatment. Error bars represent the 95% confidence intervals*

Figure 3. Percentage of participants with sub-microscopic malaria (qPCR) over time by post-malaria treatment group

Figure 4. Reticulocyte percentage as an indicator of bone marrow response by treatment group for both years combined.

Figure 5. Urinary neopterin by post-malaria treatment group

Figure 1 CONSORT Flow Diagram describing participants' movements in 2007 & 2008

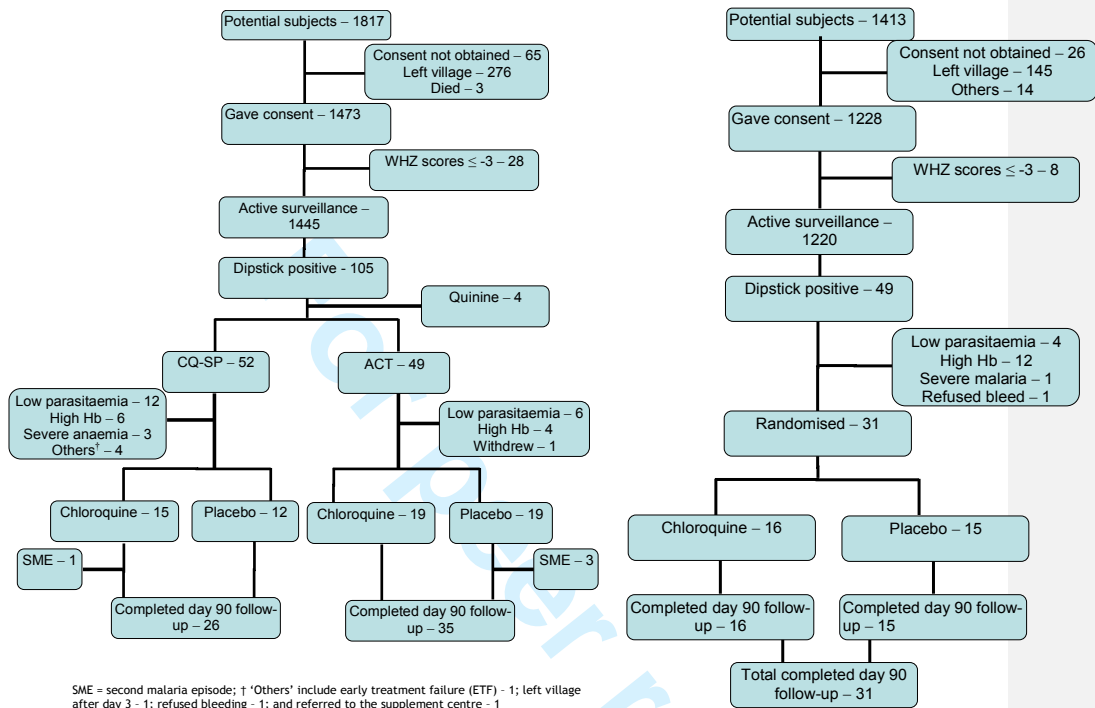

Figure 2 Mean change in haemoglobin concentration at day 30 and day 90 from baseline at day 3 by treatment group for each year of study and for both years combined.

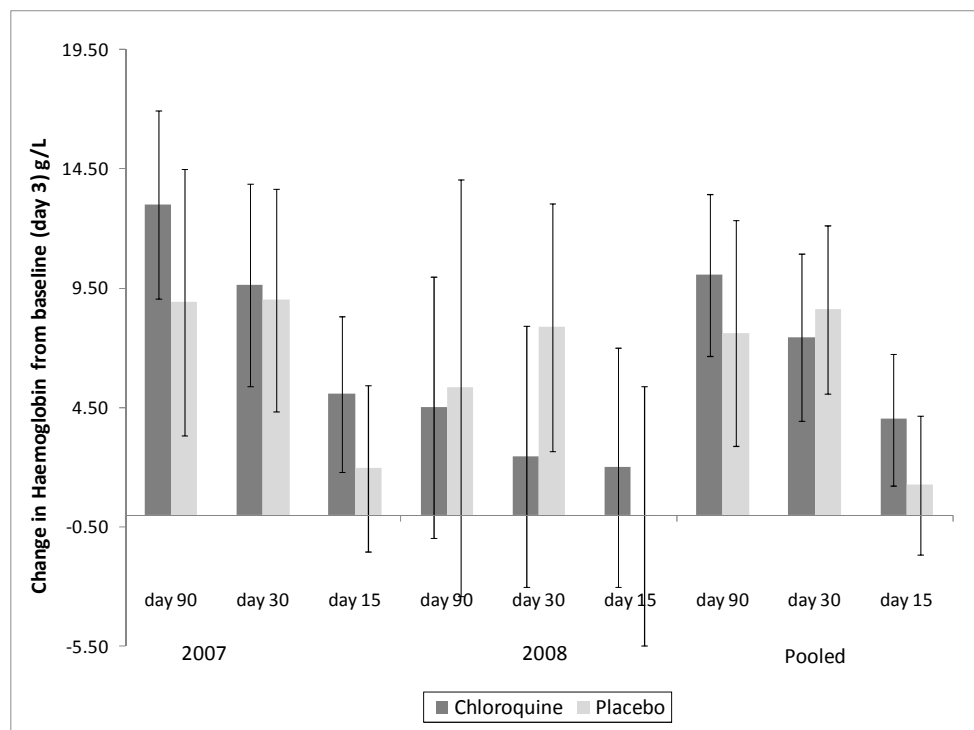

Error bars represent the 95% confidence intervals

35

Figure 3. Percentage of participants with sub-microscopic malaria (qPCR) over time by post-malaria treatment group

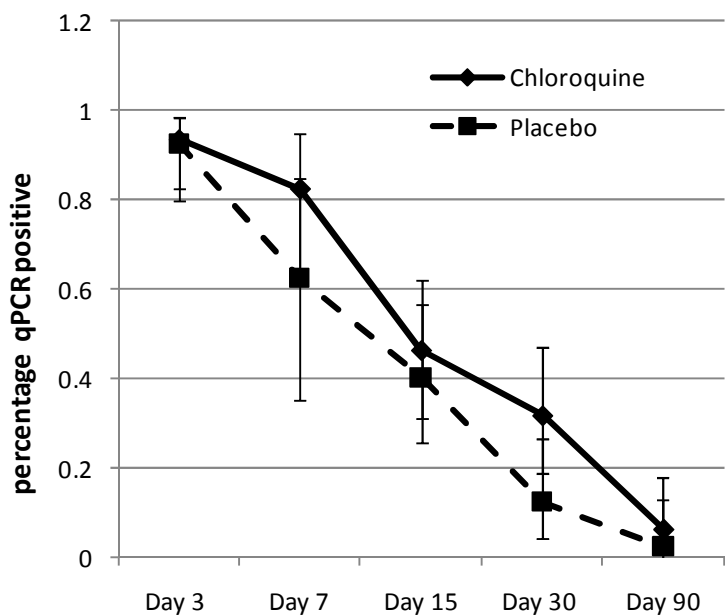

35

1  
2  
3  
4  
5  
6  
7  
8  
9  
10  
11  
12  
13  
14  
15  
16  
17  
18  
19  
20  
21  
22  
23  
24  
25  
26  
27  
28  
29  
30  
31  
32  
33  
34  
35  
36  
37  
38  
39  
40  
41  
42  
43  
44  
45  
46  
47  
48  
49  
50  
51  
52  
53  
54  
55  
56  
57  
58  
59  
60

36

Figure 4. Reticulocyte percentage as an indicator of bone marrow response by treatment group for both years combined.

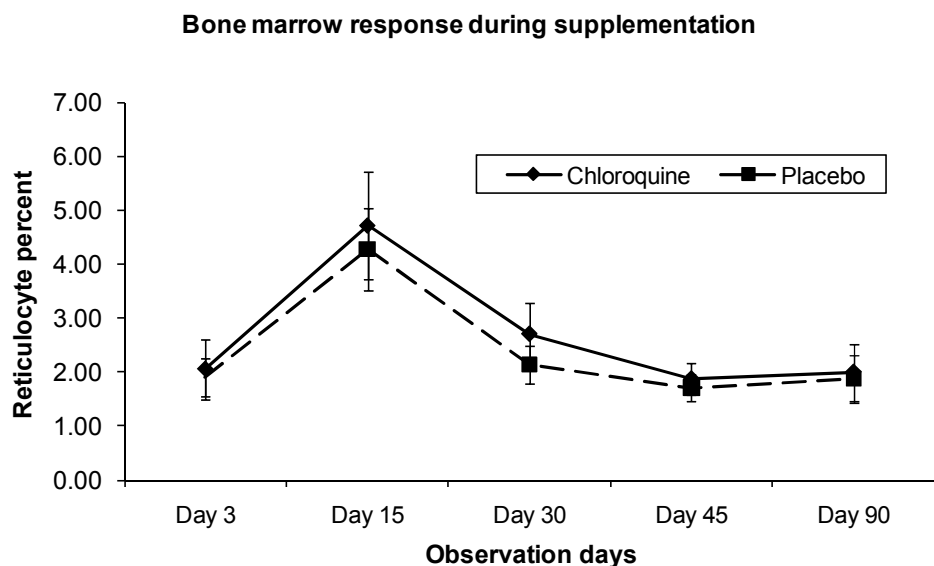

ew only

36



37

**Figure 5. Box and whisker plot of urinary neopterin by post-malaria treatment group**

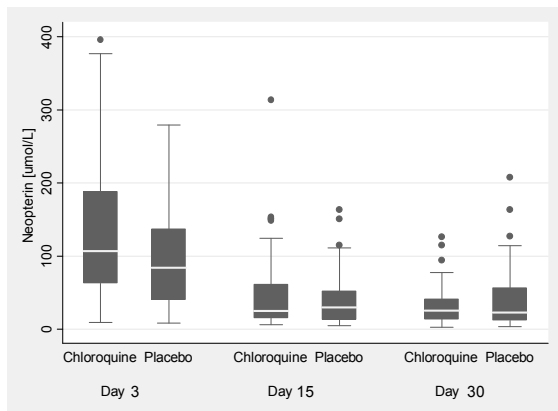

37

Figure S1 Mean change in hemoglobin in the placebo arm by initial anti-malarial treatment group in 2007 study.

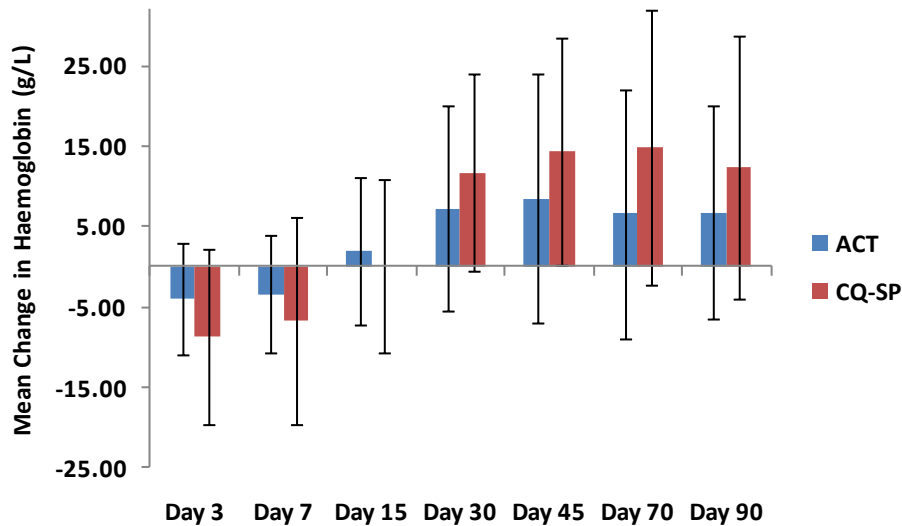

Change in Hemoglobin at day 3 is compared to haemoglobin concentration at presentation with malaria and initiation of anti-malaria treatment. Thereafter the comparison is with baseline levels at day 3 after completion of anti-malarial treatment. Error bars represent the 95% confidence intervals

From Day 30 onwards there was a larger Hb response in children who received anti-malaria therapy with CQ-SP compared to ACT. However, the drop in Hb from Day 0 to Day 3 and Day 7 in children who were initially treated with ACT was smaller than the drop in children initially treated with CQ-SP, although the difference was not significant resulting in similar levels of final Hb as indicated in the analysis to determine independent predictors of Day 90 Hb, in which Hb at Day 0 was the strongest predictor.

Figure S2. Percentage of participants with sub-microscopic malaria (qPCR) over time in the placebo group (2007 study) by initial anti-malaria treatment

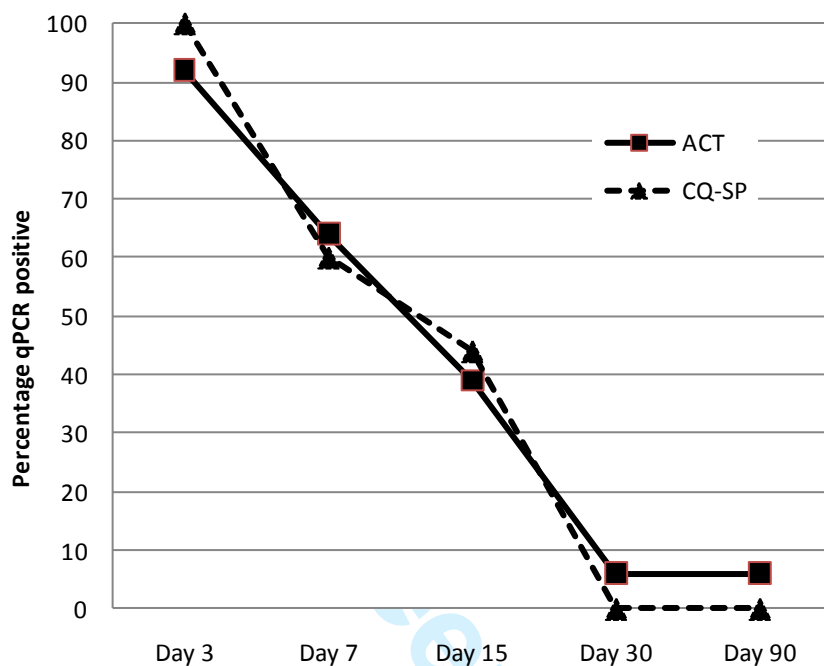

There was no effect of initial anti-malaria treatment on parasite clearance up until 3 months post-malarial episode.

1  
2  
3  
4  
5  
6  
7  
8  
9  
10  
11  
12  
13  
14  
15  
16  
17  
18  
19  
20  
21  
22  
23  
24  
25  
26  
27  
28  
29  
30  
31  
32  
33  
34  
35  
36  
37  
38  
39  
40  
41  
42  
43  
44  
45  
46  
47  
48  
49  
50  
51  
52  
53  
54  
55  
56  
57  
58  
59  
60

**Figure S3. Box and whisker plot of urinary neopterin in the placebo group (2007 study) by initial anti-malaria treatment**

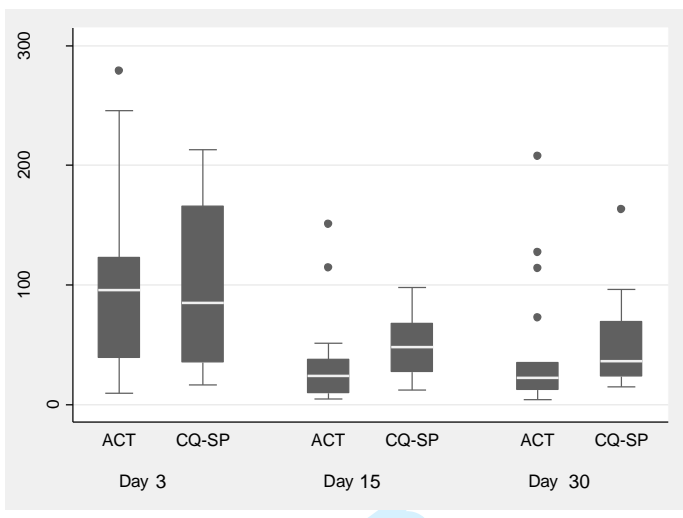

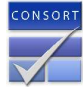

## CONSORT 2010 checklist of information to include when reporting a randomised trial\*

| Section/Topic                    | Item No | Checklist item                                                                                                                                                                              | Reported on page No |
|----------------------------------|---------|---------------------------------------------------------------------------------------------------------------------------------------------------------------------------------------------|---------------------|
| <b>Title and abstract</b>        |         |                                                                                                                                                                                             |                     |
|                                  | 1a      | Identification as a randomised trial in the title                                                                                                                                           | 1                   |
|                                  | 1b      | Structured summary of trial design, methods, results, and conclusions (for specific guidance see CONSORT for abstracts)                                                                     | 2-3                 |
| <b>Introduction</b>              |         |                                                                                                                                                                                             |                     |
| Background and objectives        | 2a      | Scientific background and explanation of rationale                                                                                                                                          | 6-7                 |
|                                  | 2b      | Specific objectives or hypotheses                                                                                                                                                           | 7                   |
| <b>Methods</b>                   |         |                                                                                                                                                                                             |                     |
| Trial design                     | 3a      | Description of trial design (such as parallel, factorial) including allocation ratio                                                                                                        | 8                   |
|                                  | 3b      | Important changes to methods after trial commencement (such as eligibility criteria), with reasons                                                                                          | 8                   |
| Participants                     | 4a      | Eligibility criteria for participants                                                                                                                                                       | 8-9                 |
|                                  | 4b      | Settings and locations where the data were collected                                                                                                                                        | 8                   |
| Interventions                    | 5       | The interventions for each group with sufficient details to allow replication, including how and when they were actually administered                                                       | 10-11 & 9-10        |
| Outcomes                         | 6a      | Completely defined pre-specified primary and secondary outcome measures, including how and when they were assessed                                                                          | 11, 9-10, & 12      |
|                                  | 6b      | Any changes to trial outcomes after the trial commenced, with reasons                                                                                                                       | N/A                 |
| Sample size                      | 7a      | How sample size was determined                                                                                                                                                              | 11-12               |
|                                  | 7b      | When applicable, explanation of any interim analyses and stopping guidelines                                                                                                                | N/A                 |
| Randomisation:                   |         |                                                                                                                                                                                             |                     |
| Sequence generation              | 8a      | Method used to generate the random allocation sequence                                                                                                                                      | 10                  |
|                                  | 8b      | Type of randomisation; details of any restriction (such as blocking and block size)                                                                                                         | 10                  |
| Allocation concealment mechanism | 9       | Mechanism used to implement the random allocation sequence (such as sequentially numbered containers), describing any steps taken to conceal the sequence until interventions were assigned | 10                  |
| Implementation                   | 10      | Who generated the random allocation sequence, who enrolled participants, and who assigned participants to interventions                                                                     | 10                  |
| Blinding                         | 11a     | If done, who was blinded after assignment to interventions (for example, participants, care providers, those                                                                                | 10                  |

|    |                          |                                                                                                                     |                    |
|----|--------------------------|---------------------------------------------------------------------------------------------------------------------|--------------------|
| 1  |                          |                                                                                                                     |                    |
| 2  |                          | assessing outcomes) and how                                                                                         |                    |
| 3  |                          |                                                                                                                     |                    |
| 4  |                          | 11b If relevant, description of the similarity of interventions                                                     | 10-11              |
| 5  | Statistical methods      | 12a Statistical methods used to compare groups for primary and secondary outcomes                                   | 12-13              |
| 6  |                          | 12b Methods for additional analyses, such as subgroup analyses and adjusted analyses                                | 12-13              |
| 7  |                          |                                                                                                                     |                    |
| 8  | <b>Results</b>           |                                                                                                                     |                    |
| 9  | Participant flow (a      | 13a For each group, the numbers of participants who were randomly assigned, received intended treatment, and        | 14 & Fig1          |
| 10 | diagram is strongly      | were analysed for the primary outcome                                                                               |                    |
| 11 | recommended)             | 13b For each group, losses and exclusions after randomisation, together with reasons                                | 14                 |
| 12 | Recruitment              | 14a Dates defining the periods of recruitment and follow-up                                                         | 8 & 4              |
| 13 |                          | 14b Why the trial ended or was stopped                                                                              | N/A                |
| 14 |                          |                                                                                                                     |                    |
| 15 | Baseline data            | 15 A table showing baseline demographic and clinical characteristics for each group                                 | 14-15 & Table<br>3 |
| 16 |                          |                                                                                                                     |                    |
| 17 | Numbers analysed         | 16 For each group, number of participants (denominator) included in each analysis and whether the analysis was      | 15-18              |
| 18 |                          | by original assigned groups                                                                                         |                    |
| 19 |                          |                                                                                                                     |                    |
| 20 | Outcomes and             | 17a For each primary and secondary outcome, results for each group, and the estimated effect size and its           | 15-18 Tables       |
| 21 | estimation               | precision (such as 95% confidence interval)                                                                         | 3,4a, 4b, Figs     |
| 22 |                          |                                                                                                                     | 2-6                |
| 23 |                          | 17b For binary outcomes, presentation of both absolute and relative effect sizes is recommended                     | N/A                |
| 24 | Ancillary analyses       | 18 Results of any other analyses performed, including subgroup analyses and adjusted analyses, distinguishing       | N/A                |
| 25 |                          | pre-specified from exploratory                                                                                      |                    |
| 26 |                          |                                                                                                                     |                    |
| 27 | Harms                    | 19 All important harms or unintended effects in each group (for specific guidance see CONSORT for harms)            | N/A                |
| 28 |                          |                                                                                                                     |                    |
| 29 | <b>Discussion</b>        |                                                                                                                     |                    |
| 30 | Limitations              | 20 Trial limitations, addressing sources of potential bias, imprecision, and, if relevant, multiplicity of analyses | 2, 19-21           |
| 31 | Generalisability         | 21 Generalisability (external validity, applicability) of the trial findings                                        | 19-21              |
| 32 | Interpretation           | 22 Interpretation consistent with results, balancing benefits and harms, and considering other relevant evidence    | 19-21              |
| 33 |                          |                                                                                                                     |                    |
| 34 | <b>Other information</b> |                                                                                                                     |                    |
| 35 | Registration             | 23 Registration number and name of trial registry                                                                   | 1                  |
| 36 | Protocol                 | 24 Where the full trial protocol can be accessed, if available                                                      | N/A                |
| 37 | Funding                  | 25 Sources of funding and other support (such as supply of drugs), role of funders                                  | 1                  |
| 38 |                          |                                                                                                                     |                    |
| 39 |                          |                                                                                                                     |                    |
| 40 |                          |                                                                                                                     |                    |
| 41 |                          |                                                                                                                     |                    |
| 42 |                          |                                                                                                                     |                    |
| 43 |                          |                                                                                                                     |                    |
| 44 | CONSORT 2010 checklist   |                                                                                                                     |                    |
| 45 |                          |                                                                                                                     |                    |
| 46 |                          |                                                                                                                     |                    |
| 47 |                          |                                                                                                                     |                    |
| 48 |                          |                                                                                                                     |                    |
| 49 |                          |                                                                                                                     |                    |

1  
2 \*We strongly recommend reading this statement in conjunction with the CONSORT 2010 Explanation and Elaboration for important clarifications on all the items. If relevant, we also  
3 recommend reading CONSORT extensions for cluster randomised trials, non-inferiority and equivalence trials, non-pharmacological treatments, herbal interventions, and pragmatic trials.  
4 Additional extensions are forthcoming: for those and for up to date references relevant to this checklist, see [www.consort-statement.org](http://www.consort-statement.org).  
5  
6  
7  
8  
9  
10  
11  
12  
13  
14  
15  
16  
17  
18  
19  
20  
21  
22  
23  
24  
25  
26  
27  
28  
29  
30  
31  
32  
33  
34  
35  
36  
37  
38  
39  
40  
41  
42  
43  
44  
45  
46  
47  
48  
49

For peer review only

Figure 1 CONSORT Flow Diagram describing participants' movements in 2007 & 2008

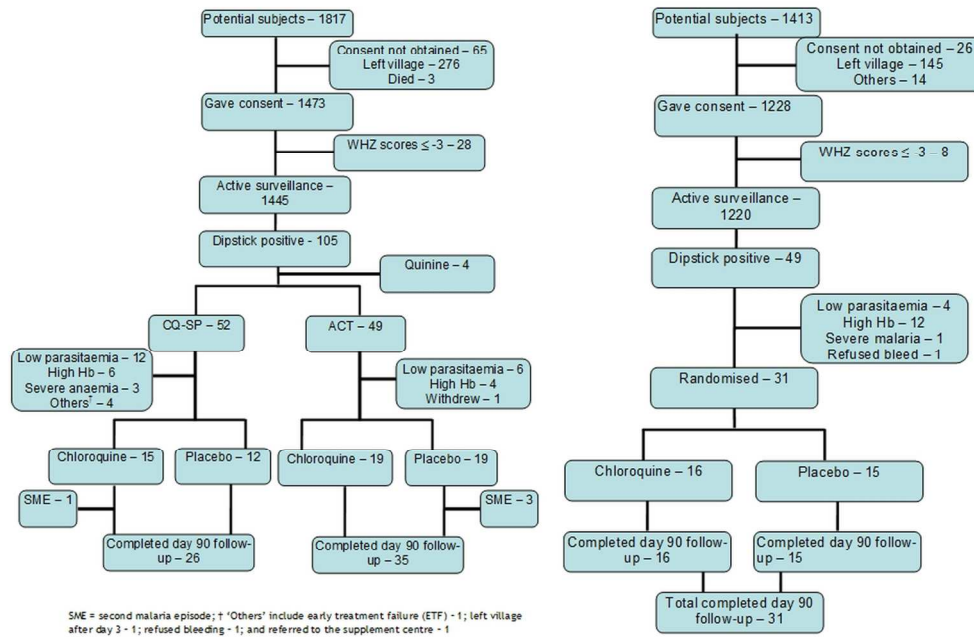

130x90mm (300 x 300 DPI)

view only



Figure 2 Mean change in haemoglobin concentration at day 30 and day 90 from baseline at day 3 by treatment group for each year of study and for both years combined.

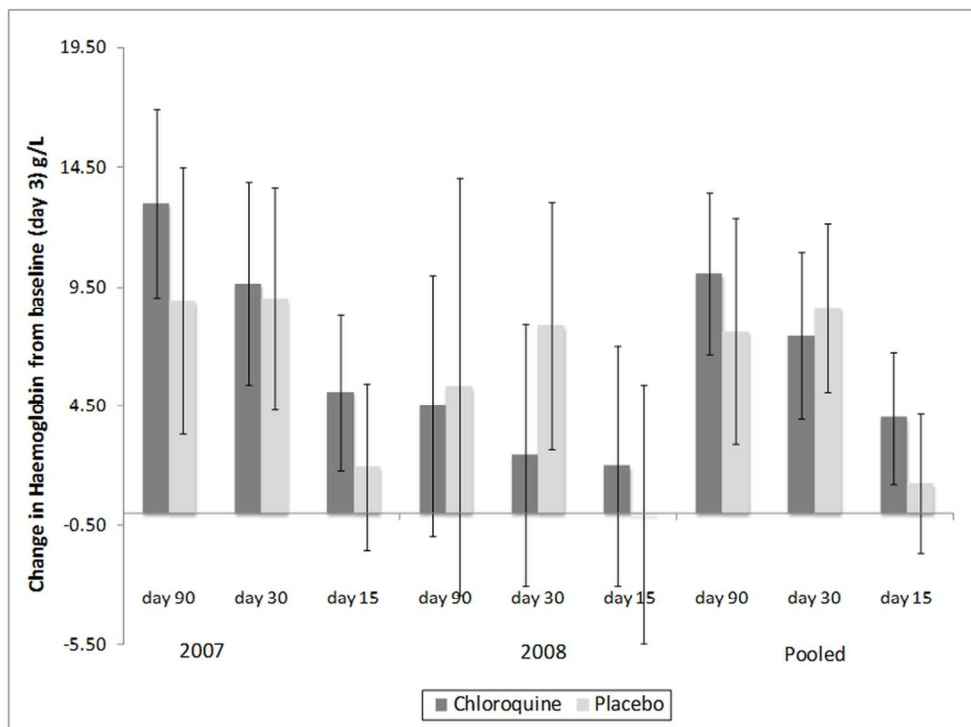

Error bars represent the 95% confidence intervals

103x90mm (300 x 300 DPI)

1  
2  
3  
4  
5  
6  
7  
8  
9  
10  
11  
12  
13  
14  
15  
16  
17  
18  
19  
20  
21  
22  
23  
24  
25  
26  
27  
28  
29  
30  
31  
32  
33  
34  
35  
36  
37  
38  
39  
40  
41  
42  
43  
44  
45  
46  
47  
48  
49  
50  
51  
52  
53  
54  
55  
56  
57  
58  
59  
60

Figure 3. Percentage of participants with sub-microscopic malaria (qPCR) over time by post-malaria treatment group

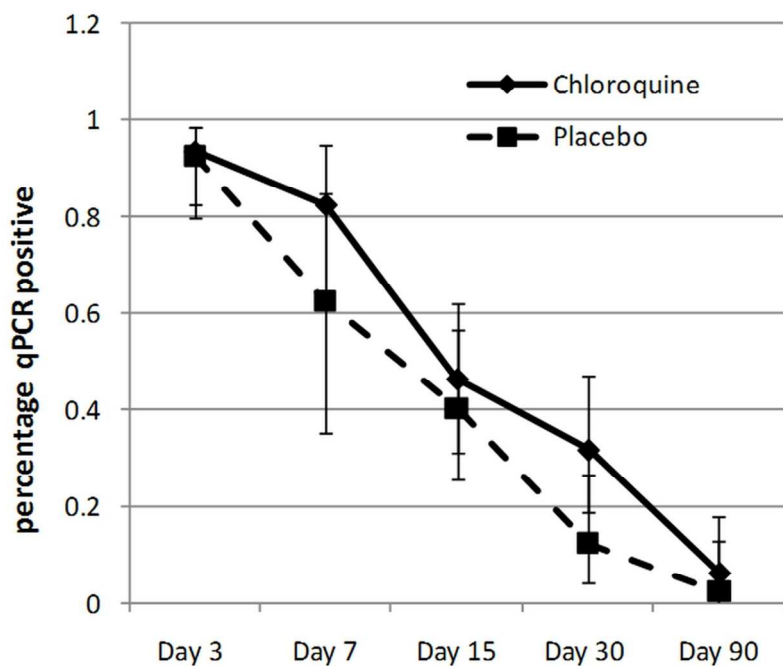

116x90mm (300 x 300 DPI)

Figure 4. Reticulocyte percentage as an indicator of bone marrow response by treatment group for both years combined.

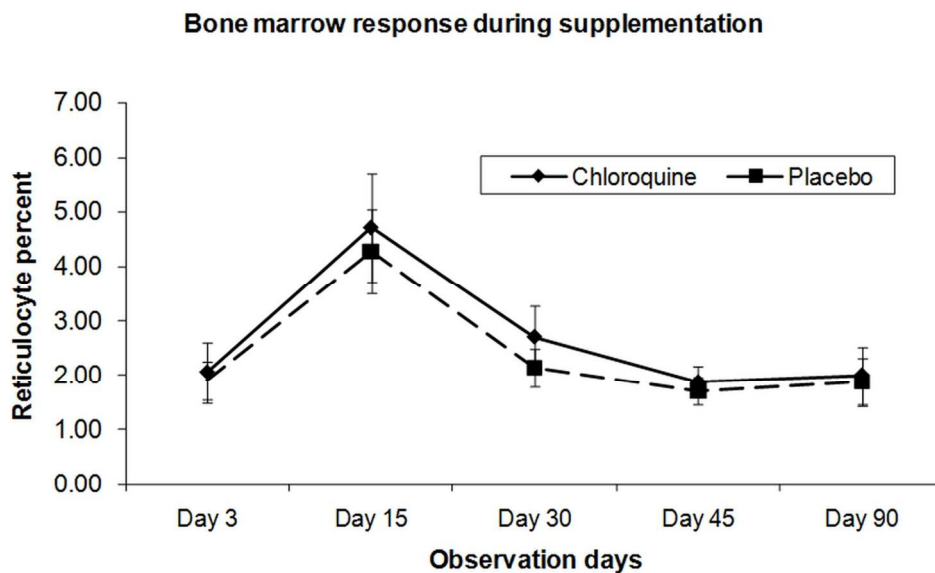

131x90mm (300 x 300 DPI)

view only

1  
2  
3  
4  
5  
6  
7  
8  
9  
10  
11  
12  
13  
14  
15  
16  
17  
18  
19  
20  
21  
22  
23  
24  
25  
26  
27  
28  
29  
30  
31  
32  
33  
34  
35  
36  
37  
38  
39  
40  
41  
42  
43  
44  
45  
46  
47  
48  
49  
50  
51  
52  
53  
54  
55  
56  
57  
58  
59  
60

Figure 5. Box and whisker plot of urinary neopterin by post-malaria treatment group

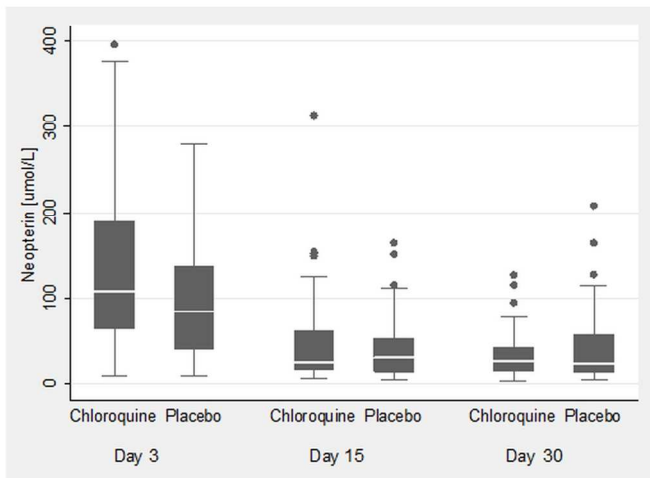

158x90mm (300 x 300 DPI)

review only
